# Supplementary material for: An Abundance of Ubiquitously Expressed Genes Revealed by Tissue Transcriptome Sequence Data
Source: PLoS Comput Biol. 2009 Dec 11;5(12):e1000598. doi: 10.1371/journal.pcbi.1000598 (PMC2781110; doi:10.1371/journal.pcbi.1000598)
Supplement: Dataset S1 — Ubiquitously expressed human genes (0.45 MB XLS) [file pcbi.1000598.s008.xls]

## Sheet: Sheet1
Dataset S1. Ubiquitously expressed human genes
Gene symbol (overlapping genes are separated by '|')
CCDC127
SDHA
AHRR|PDCD6
EXOC3
BRD9
SLC12A7
CLPTM1L
LPCAT1
MRPL36
NDUFS6
KIAA0947
MED10
NSUN2
POLS
MTRR
LOC134145
CCT5
CMBL
MARCH6
DAP
TRIO
FAM105B
ZNF622
FAM134B
MYO10
RNASEN
C5orf22
GOLPH3
MTMR12
ZFR
SUB1
TARS
AMACR
RAI14
RAD1
BXDC2
DNAJC21
LMBRD2
SKP2
C5orf33
NIPBL
NUP155
WDR70
TTC33
PRKAA1
RPL37
FBXO4
ZNF131
HMGCS1
C5orf28
PAIP1
NNT
MRPS30
ITGA1|PELO
MOCS2
NDUFS4
SNX18
DHX29
SKIV2L2
PPAP2A
SLC38A9
IL6ST
MIER3
GPBP1
PLK2
NDUFAF2
DKFZP686E2158
KIF2A
DIMT1L
IPO11
SFRS12IP1
SDCCAG10
PPWD1
TRIM23
FLJ13611
SGTB
ERBB2IP
SFRS12
PIK3R1
SLC30A5
CCNB1
CDK7
RAD17|TAF9
MRPS27
PTCD2
TNPO1
FCHO2
BTF3
ANKRA2
UTP15
ENC1
HEXB
GFM2
TINP1
HMGCR
COL4A3BP
POLK
C5orf37
AGGF1
WDR41
TBCA
AP3B1
SCAMP1
ARSB
JMY
PAPD4
ZFYVE16
DHFR|MSH3
ZCCHC9
SSBP2
ATG10
RPS23
LOC92270
TMEM167A
COX7C
RASA1
CCNH
TMEM161B
CETN3
LYSMD3
ARRDC3
C5orf21
KIAA0372
ARSK
RHOBTB3
GLRX
ELL2
CAST
ERAP1
RIOK2
RGMB
CHD1
TMEM157
PAM
NUDT12
FBXL17
PJA2
SLC25A46
WDR36
APC
SRP19
REEP5
MCC
YTHDC2
PGGT1B
FEM1C
TICAM2|TMED7
ATG12
AP3S1
COMMD10
DMXL1
HSD17B4
SNX2
SNX24
CCDC100
CSNK1G3
ALDH7A1
RNUXA
LMNB1
PRRC1
SLC12A2
ISOC1
HINT1
LYRM7
CDC42SE2
FNIP1
P4HA2
SLC22A5
IRF1
RAD50
SEPT8
SHROOM1
UQCRQ
AFF4
ZCCHC10
HSPA4
C5orf15
VDAC1
CDKN2AIPNL
SKP1
PPP2CA
UBE2B
PHF15
SAR1B
SEC24A
CAMLG
DDX46
C5orf24
TXNDC15
PCBD2
H2AFY
SMAD5
HNRNPA0
C5orf5
BRD8
CDC23
FAM53C
JMJD1B
EGR1
ETF1
HSPA9
CTNNA1
SIL1
MATR3
PAIP2
TMEM173
UBE2D2
CXXC5
PURA
LOC492311
C5orf32
PFDN1
ANKHD1|ANKHD1-EIF4EBP3
ANKHD1-EIF4EBP3|EIF4EBP3
SRA1
APBB3
SLC35A4
TMCO6
NDUFA2
IK
WDR55
HARS
HARS2
ZMAT2
TAF7
DIAPH1
HDAC3
PCDH1
KIAA0141
RNF14
GNPDA1
NDFIP1
ARHGAP26
NR3C1
YIPF5
LARS
RBM27
TCERG1
ABLIM3
GRPEL2
CSNK1A1
TCOF1
RPS14
NDST1
SYNPO
RBM22
DCTN4
TNIP1
ANXA6
GM2A
ATOX1
G3BP1
MFAP3
SAP30L
LARP1
C5orf4
CNOT8
GEMIN5
MRPL22
MED7
CYFIP2
THG1L
CLINT1
RNF145
UBLCP1
TTC1
PWWP2A
SLU7
CCNG1
NUDCD2
MAT2B
RARS
PANK3
NPM1
FBXW11
STK10
UBTD2
DUSP1
ERGIC1
LOC653147|RPL26L1
ATP6V0E1
C5orf41
BNIP1
FAM44B
CPEB4
SFXN1
THOC3
C5orf25
KIAA1191
HSPC111
HIGD2A
CLTB
UBXD8
RNF44
TSPAN17
UIMC1
ZNF346
NSD1
RAB24
PRELID1
LMAN2
GRK6
DBN1
PDLIM7
DDX41
FLJ10404
TMED9
B4GALT7
LOC653314
RMND5B
NOLA2
HNRNPAB
AGXT2L2
CLK4
ZNF354A
RUFY1
HNRNPH1
CANX
MAML1
MGAT4B
SQSTM1
LOC51149
TBC1D9B
RNF130
MAPK9
CNOT6
MGAT1
ZFP62
TRIM41
GNB2L1
TRIM52
TUBGCP5
CYFIP1
NIPA2
NIPA1
UBE3A
HERC2
NDNL2
TJP1
MTMR15
MTMR10
KLF13
AVEN
C15orf24
C15orf29
TMEM85
SLC12A6
NOLA3
AGPAT7
AQR
ZNF770
ATPBD4
MEIS2
SPRED1
FAM98B
THBS1
EIF2AK4
SRP14
C15orf52
C15orf23
IVD
BAHD1
C15orf57
RPUSD2
FAM82C
GCHFR
DNAJC17|ZFYVE19
VPS18
INOC1
CHP
NDUFAF1
RTF1
RPAP1
MGA
LOC100137047|LOC100137047-PLA2G4B
LOC100137047-PLA2G4B|PLA2G4B
EHD4
VPS39
TMEM87A
CAPN3|GANC
ZFP106
SNAP23
LRRC57
CEP27
CDAN1
UBR1
TMEM62
CCNDBP1
LCMT2
ADAL
ZSCAN29
TUBGCP4
TP53BP1
HISPPD2A
PDIA3
SERF2
SERINC4
HYPK
MFAP1
CASC4
CTDSPL2
EIF3J
SPG11
B2M
SORD
SHF
SPATA5L1
PLDN
SQRDL
DUT
EID1
KIAA0256
COPS2
GALK2
DTWD1
GABPB2
USP8
TRPM7
LYSMD2
LEO1
MAPK6
GNB5
ARPP-19
KIAA1370
C15orf15
PIGB
CCPG1
RFXDC2
ZNF280D
TCF12
GRINL1A|Gcom1
ADAM10
FAM63B
SLTM
RNF111
MYO1E
GTF2A2
BNIP2
ANXA2
NARG2
VPS13C
TPM1
LACTB
RPS27L
RAB8B
USP3
HERC1
FAM96A
SNX1
PPIB
TRIP4
ZNF609
OAZ2
PLEKHO2
SPG21
MTFMT
PDCD7
CLPX
PARP16
DPP8
PTPLAD1
C15orf44
DENND4A
RAB11A
DIS3L
TIPIN
MAP2K1
SNAPC5
RPL4
SMAD6
SMAD3
FLJ11506
MAP2K5
PIAS1
CALML4
CLN6
FEM1B
ANP32A
GLCE
RPLP1
TLE3
UACA
THSD4
PKM2
PARP6
HEXA
ARIH1
BBS4
ADPGK
NEO1
NPTN
CD276
STOML1
PML
UBL7
CLK3
EDC3
CSK
ULK3
SCAMP2
MPI
C15orf17
COX5A
PPCDC
COMMD4
NEIL1
MAN2C1
SIN3A
PTPN9
SNUPN
IMP3
SNX33
UBE2Q2
FBXO22
ETFA
SCAPER
RCN2
TSPAN3
SGK269
HMG20A
TBC1D2B
IDH3A
DNAJA4
WDR61
IREB2
PSMA4
MORF4L1
CTSH
TMED3
MTHFS
ST20
C15orf37
ZFAND6
FAH
FAM108C1
MESDC2
MESDC1
STARD5
EFTUD1
WHDC1
FAM103A1
C15orf40
BTBD1
HDGFRP3
ZSCAN2
WDR73
SEC11A
ZNF592
PDE8A
KLHL25
MRPL46
MRPS11
DET1
ISG20L1
ISG20
MFGE8
ABHD2
FANCI
POLG
PEX11A
AP3S2
C15orf38
ZNF710
IDH2
SEMA4B
CIB1
NGRN
IQGAP1
CRTC3
FURIN
MAN2A2
UNC45A
HDDC3
RCCD1
VPS33B
SLCO3A1
LOC400451
CHD2
NR2F2
ARRDC4
LRRC28
MEF2A
LYSMD4
LINS1
ASB7
ALDH1A3
CHSY1
SELS
SNRPA1
TM2D3
TARSL2
FAM20C
PRKAR1B
HEATR2
UNC84A
C7orf20
C7orf50
GPR146
ZFAND2A
INTS1
MAFK
PSMG3
MAD1L1
FTSJ2
NUDT1
SNX8
EIF3B
CHST12
C7orf27
TTYH3
GNA12
KIAA0415
RBAK
WIPI2
SLC29A4
TNRC18
ACTB
FSCN1
RNF216
C7orf28A
PMS2
JTV1
EIF2AK1
USP42
PSCD3
MGC12966
RAC1
DAGLB
KDELR2
ZDHHC4
C7orf26
ZNF12
FLJ20323
RPA3
NDUFA4
PHF14
TMEM106B
ANKMY2
BZW2
TSPAN13
SNX13
TWISTNB
CDCA7L
TOMM7
KLHL7
NUPL2
C7orf30
TRA2A
CYCS
HNRNPA2B1
CBX3
SKAP2
HIBADH
TAX1BP1
JAZF1
SCRN1
C7orf41
ZNRF2
C7orf24
GARS
LSM5
KIAA0241
KBTBD2
FKBP9
NT5C3
RP9
HERPUD2
SEPT7
EEPD1
STARD3NL
VPS41
C7orf36
RALA
CDC2L5
C7orf11
C7orf25
PSMA2
MRPL32
STK17A
C7orf44
BLVRA
MRPS24
URG4
UBE2D4
DBNL
PGAM2
POLM
POLD2
YKT6
NUDCD3
LOC644907
DDX56
TMED4
OGDH
ZMIZ2
PPIA
H2AFV
PURB
CCM2
TBRG4
TNS3
HUS1
UPP1
GRB10
SEC61G
LANCL2
ECOP
MRPS17
GBAS
PSPH
CCT6A
SUMF2
CHCHD2
VKORC1L1
GUSB
ASL
RCP9
TPST1
KCTD7
RABGEF1
C7orf42
SBDS
TYW1
STAG3L4
AUTS2
POM121
NSUN5C
NSUN5
BAZ1B
BCL7B
TBL2
VPS37D
WBSCR18
WBSCR22
ABHD11
LIMK1
EIF4H
RFC2
GTF2IRD1
GTF2I
WBSCR16
NSUN5B
POM121C
HIP1
RHBDD2
POR
TMEM120A
STYXL1
MDH2
HSPB1
YWHAG
DTX2
POMZP3
PTPN12
RSBN1L
TMEM60
DMTF1
C7orf23
CROT
DBF4|SLC25A40
SRI
GTPBP10
CLDN12
AKAP9
CYP51A1
KRIT1
ANKIB1
GATAD1
PEX1
DKFZP564O0523
CCDC132
BET1
CASD1
PON2
SLC25A13
SHFM1
ASNS
LMTK2
DKFZP434B0335
BRI3
TRRAP
SMURF1
ARPC1A
ARPC1B
PDAP1
BUD31
PTCD1
CPSF4
ATP5J2
ZNF394
ZKSCAN5
ZNF498
AZGP1
ZKSCAN1
ZSCAN21
ZNF3
COPS6
MCM7
AP4M1|MCM7
TAF6
CNPY4
LOC389541
C7orf43
STAG3
MGC57359
PILRB
PILRA
ZCWPW1
MEPCE
C7orf47
TSC22D4
HRBL
LRCH4
PCOLCE
MOSPD3
GNB2
GIGYF1
POP7
SLC12A9
TRIP6
ARS2
TRIM56
AP1S1
PLOD3|ZNHIT1
CLDN15
FIS1
RABL5
CUX1
PRKRIP1
ALKBH4
LRWD1
POLR2J
POLR2J3
POLR2J2
ARMC10
PMPCB
ZRF1
PSMC2
ORC5L
MLL5
SRPK2
PUS7
RINT1
ATXN7L1
SYPL1
NAMPT
HBP1
COG5|DUS4L
BCAP29
CBLL1
DLD
LAMB1
PNPLA8
THAP5
DNAJB9
IMMP2L
IFRD1
TMEM168
CAPZA2
ST7
LSM8
ING3
FAM3C
LOC392979
NDUFA5
WASL
POT1
GCC1
ARF5
SND1
RBM28
IMPDH1
HIG2
METTL2B
CALU
ATP6V1F
TNPO3
TSPAN33
AHCYL2
NRF1
UBE2H
ZC3HC1
KIAA0265
TMEM209
COPG2
MKLN1
CHCHD3
EXOC4
BPGM
TMEM140
C7orf49
WDR91
CNOT4
NUP205
MTPN
TRIM24
FLJ25778
C7orf55
LUC7L2
HIPK2
JHDM1D
SLC37A3
MKRN1
ADCK2
NDUFB2
BRAF
MRPS33
AGK
KIAA1147
SSBP1
GSTK1
CASP2
ZYX
FAM115A
CUL1
PDIA4
ZNF786
ZNF398
ZNF282
ZNF212
ZNF783
ZNF777
ZNF746
LOC643641
ATP6V0E2
REPIN1
ABCB8
CDK5
SLC4A2
FASTK
TMUB1
CENTG3
ABCF2
CSGlcA-T
SMARCD3
NUB1
RHEB
PRKAG2
GALNT11
MLL3
ACTR3B
PAXIP1
INSIG1
RBM33
LMBR1
NOM1
UBE3C
DNAJB6
NCAPG2
FAM62B
WDR60
NOC2L
KLHL17
ISG15
AGRN
SDF4
B3GALT6
UBE2J2
CENTB5
PUSL1
CPSF3L
GLTPD1
TAS1R3
DVL1
MXRA8
AURKAIP1
CCNL2
MRPL20
ATAD3B
ATAD3A
SSU72
MIB2
CDC2L1|CDC2L2
LOC728661
SLC35E2
NADK
GNB1
PRKCZ
C1orf86
SKI
RER1
PEX10
PANK4
C1orf93
TPRG1L
WDR8
LRRC47
KIAA0562
C1orf174
NPHP4
KCNAB2
RPL22
ICMT
ACOT7
NOL9
ZBTB48
KLHL21
THAP3
DNAJC11
CAMTA1
VAMP3
PER3
PARK7
ERRFI1
RERE
ENO1
H6PD
SLC25A33
CLSTN1
CTNNBIP1
LZIC
NMNAT1
UBE4B
KIF1B
PGD
APITD1
DFFA
PEX14
TARDBP
SRM
EXOSC10
FRAP1
UBIAD1
FBXO2|FBXO44
FBXO44
FBXO6
MAD2L2
AGTRAP
MTHFR
CLCN6
KIAA2013
PLOD1
MFN2
IIP45
VPS13D
DHRS3
PRDM2
TMEM51
EFHD2
CASP9
DNAJC16
DDI2
RSC1A1
PLEKHM2
LOC440567
SPEN
ZBTB17
EPHA2
C1orf89
FBXO42
C1orf144
NECAP2
NBPF1|NBPF10
CROCC
ATP13A2
SDHB
RCC2
ARHGEF10L
ALDH4A1
UBR4
KIAA0090
MRTO4
AKR7A2
PQLC2
CAPZB
C1orf151
NBL1
CAMK2N1
MUL1
PINK1
DDOST
HP1BP3
EIF4G3
ECE1
NBPF3
USP48
CDC42
ZBTB40
AOF2
LUZP1
HNRNPR
C1orf213|ZNF436
TCEA3
DDEFL1
ID3
RPL11
TCEB3
C1orf128
LYPLA2
HMGCL
FUCA1
NPAL3
SRRM1
CLIC4
SYF2
C1orf63
TMEM50A
TMEM57
LDLRAP1
SEPN1
FAM54B
PAQR7
STMN1
PAFAH2
ZNF593
CCDC21
SH3BGRL3
UBXD5
DHDDS
HMGN2
RPS6KA1
ARID1A
PIGV
ZDHHC18
GPN2
GPATCH3
NUDC
SLC9A1
WDTC1
C1orf160
MAP3K6
WASF2
AHDC1
IFI6
FAM76A
STX12
PPP1R8
RPA2
EYA3
DNAJC8
ATPIF1
SESN2
MED18
PHACTR4
RCC1|SNHG3-RCC1
TRSPAP1
TAF12
GMEB1
YTHDF2
EPB41
SFRS4
MECR
PTPRU
SDC3
PUM1
WDR57
ZCCHC17
PEF1
COL16A1
PTP4A2
KHDRBS1
TMEM39B
KPNA6
TXLNA
C1orf91
EIF3I
HDAC1
MARCKSL1
BSDC1
ZBTB8OS
RBBP4
KIAA1522
S100PBP|YARS
TMEM54
RNF19B
AK2
ZNF362
PHC2
C1orf212
ZMYM6
SFPQ
ZMYM4
KIAA0319L
NCDN
PSMB2
EIF2C4
EIF2C1
EIF2C3
ADPRHL2
TRAPPC3
MAP7D1
THRAP3
STK40
LSM10
MRPS15
C1orf149
SNIP1
GNL2
C1orf109
YRDC
C1orf122
MTF1
INPP5B
SF3A3
FHL3
UTP11L
RRAGC
C1orf108
NDUFS5
MACF1
KIAA0754
PABPC4
PPIE
TRIT1
CAP1
PPT1
RLF
ZMPSTE24
SMAP2
C1orf176
NFYC
CITED4
CTPS
SCMH1
FOXJ3
PPCS
PPIH
YBX1
LEPRE1
C1orf50
CCDC23|ERMAP
ERMAP
ZNF691
SLC2A1
EBNA1BP2
ELOVL1
MED8
C1orf84
KIAA0467
HYI
PTPRF
JMJD2A
ST3GAL3
IPO13
DPH2
ATP6V0B
B4GALT2
CCDC24
DMAP1
PRNPIP
C1orf164
TMEM53
RPS8
EIF2B3
HECTD3
UROD
MUTYH|TOE1
TESK2
MMACHC
PRDX1
AKR1A1
NASP
GPBP1L1
TMEM69
IPP
MAST2
PIK3R3
POMGNT1
C1orf190
LRRC41
UQCRH
NSUN4
MKNK1
MOBKL2C
ATPAF1
KIAA0494
CMPK1
FAF1
CDKN2C
RNF11
EPS15
OSBPL9
NRD1
TXNDC12
KTI12
BTF3L4
ZFYVE9
CC2D1B
PRPF38A
ZCCHC11
C1orf163
ZYG11B
ECHDC2
SCP2
CPT2
C1orf123
MAGOH
TMEM48
YIPF1
C1orf41
LRRC42
TMEM59
C1orf83
MRPL37
SSBP3
TTC4
DHCR24
USP24
PPAP2B
OMA1
MYSM1
JUN
FGGY
TM2D1
INADL
USP1
DOCK7
ATG4C
PGM1
JAK1
LEPR|LEPROT
MIER1
SERBP1
GADD45A
GPR177
LRRC40
SFRS11
ANKRD13C
HHLA3
ZRANB2
FPGT|TNNI3K
CRYZ
TYW3
ACADM
RABGGTB
PIGK
ZZZ3
USP33
FAM73A
FUBP1
DNAJB4
PRKACB
BXDC5
GNG5|SPATA1
CTBS
C1orf52
BCL10
DDAH1
CYR61
C1orf181
SH3GLB1
SEP15
HS2ST1
LMO4
PKN2
GTF2B
CCBL2
GBP2
LRRC8D
ZNF326
ZNF644
EVI5
RPL5
MTF2
CCDC18|TMED5
DR1
FNBP1L
BCAR3
DNTTIP2
GCLM
ARHGAP29
ABCD3
ALG14
RWDD3
PTBP2
AGL
HIAT1
CCDC76
DBT
RTCD1
EXTL2
DPH5
PRPF38B
STXBP3
CLCC1
WDR47
TAF13
SARS
SORT1
PSMA5
ATXN7L2
GNAI3
AMPD2
GSTM4
GSTM2
GSTM3
AHCYL1
FAM40A
RBM15
HBXIP
C1orf103
CEPT1|TMEM77
CEPT1
ATP5F1|WDR77
RAP1A
C1orf183|DDX20
CTTNBP2NL
ST7L
CAPZA1
MOV10
RHOC
SLC16A1
LRIG2
RSBN1
AP4B1
DCLRE1B
HIPK1
TRIM33
BCAS2
NRAS
CSDE1
SIKE
ATP1A1
PTGFRN
MAN1A2
WDR3
WARS2
PHGDH
NOTCH2
NBPF20
PDE4DIP
SEC22B
NOTCH2NL
TXNIP
POLR3GL
RBM8A
PEX11B
PIAS3
POLR3C
ZNF364
GPR89A
PRKAB2
CHD1L
ACP6
GPR89B|GPR89C
NBPF10
NBPF15|NBPF16
HIST2H2BE
BOLA1
SF3B4
OTUD7B
VPS45
PLEKHO1
ANP32E
APH1A
MRPS21
PRPF3
KIAA0460
TARS2
ECM1
MCL1
ENSA
GOLPH3L
CTSK
ARNT
SETDB1
LASS2
FAM63A
PRUNE
C1orf56
CDC42SE1
RP11-68I18.1
SEMA6C
LYSMD1
SCNM1
VPS72
PIP5K1A
PSMD4
ZNF687
PI4KB
RFX5
PSMB4
POGZ
TUFT1
SNX27
MRPL9
TDRKH
THEM4
S100A10
S100A6
S100A4
S100A16
S100A13
S100A1
C1orf77|S100A13
SNAPIN
ILF2
INTS3
SLC27A3
GATAD2B
DENND4B
CRTC2
SLC39A1
CREB3L4
JTB
RAB13
RPS27
TPM3
C1orf43
UBAP2L
HAX1
ATP8B2
UBE2Q1
ADAR
PMVK
PBXIP1
PYGO2
SHC1
FLAD1
ZBTB7B
ADAM15
EFNA1
RAG1AP1
DPM3
KRTCAP2
THBS3
MTX1
GBA
C1orf2
SCAMP3
CLK2
FDPS
C1orf104|RUSC1
RUSC1
ASH1L
MSTO1
YY1AP1
DAP3
GON4L
RIT1
KIAA0907
ARHGEF2
SSR2
UBQLN4
MAPBPIP
LMNA
SLC25A44
PMF1
BGLAP
SMG5
TMEM79
C1orf85
CCT3
MEF2D
APOA1BP
GPATCH4
ISG20L2
C1orf66
MRPL24
HDGF
PRCC
ARHGEF11
DUSP23
TAGLN2
PIGM
IGSF8
PEA15
WDR42A
PEX19
COPA|NCSTN
F11R
USF1
PFDN2
NIT1
DEDD
UFC1
USP21
PPOX
B4GALT3
NDUFS2
LOC642502|SDHC
C1orf192
DUSP12
ATF6
UAP1
MGST3
ALDH9A1
UCK2
POGK
TADA1L
POU2F1
CREG1
MPZL1
BRP44
IQWD1
TIPRL
ATP1B1
NME7
BLZF1
SLC19A2
C1orf156
SCYL3
KIFAP3
SCYL1BP1
BAT2D1
VAMP4
KIAA0859
PIGC
C1orf9
PRDX6
KLHL20
CENPL|DARS2
RC3H1
RABGAP1L
CACYBP
MRPS14
RFWD2
RASAL2
FAM20B
TOR3A
TOR1AIP2
IFRG15
TOR1AIP1
CEP350
QSOX1
ACBD6
XPR1
STX6
IER5
GLUL
DHX9
LAMC1
SMG7
ARPC5
C1orf19
C1orf21
EDEM3
RNF2
C1orf25
IVNS1ABP
TPR
C1orf27
UCHL5
TROVE2
GLRX2
CDC73
NEK7
ZNF281
DDX59
CAMSAP1L1
TMEM9
CSRP1
IPO9
SHISA4
TIMM17A
RNPEP
ARL8A
PPP1R12B
JARID1B
RABIF
KLHL12
ADIPOR1
CYB5R1
TMEM183A|TMEM183B
BTG2
ATP2B4
ZC3H11A
SNRPE
SOX13
PPP1R15B
PIK3C2B
MDM4
RBBP5
PCTK3
ELK4
NUCKS1
RAB7L1
SLC41A1
RASSF5
LGTN
MAPKAPK2
CD55
CD46
C1orf107
RCOR3
LPGAT1
INTS7
PPP2R5A
TMEM206
NENF
ATF3
NSL1
TATDN3
ANGEL2
RPS6KC1
SMYD2
KCTD3
GPATCH2
RRP15
LYPLAL1
EPRS
BPNT1
IARS2
RAB3GAP2
DUSP10
MIA3
C1orf58
CAPN2
TP53BP2
FBXO28
DEGS1
NVL
CNIH4
WDR26
LBR
ENAH
SRP9
EPHX1
TMEM63A
PYCR2
C1orf55
ACBD3
PARP1
ITPKB
PSEN2
CABC1
CDC42BPA
C1orf142|JMJD4
ARF1
C1orf35
MRPL55
GUK1
TRIM11
RAB4A
ACTA1
NUP133
ABCB10
TAF5L
KIAA0133
GALNT2
COG2
C1orf198
TTC13
ARV1
FAM89A
C1orf131|GNPAT
EXOC8
C1orf124
EGLN1
TSNAX
SIPA1L2
C1orf57
C1orf31
IRF2BP2
TOMM20
RBM34
ARID4B
GGPS1
TBCE
B3GALNT2
LYST
GPR137B
LGALS8
HEATR1
MTR
FH
CEP170
AKT3|SDCCAG8
ZNF238
ADSS
FAM152A
FAM36A
HNRNPU
EFCAB2
SMYD3
TFB2M
C1orf71
AHCTF1
ZNF496
SH3BP5L
ZNF672
ZNF692
PGBD2
FBXO25
ERICH1
CLN8
MCPH1
AGPAT5
MFHAS1
THEX1
TNKS
PINX1
MTMR9
NEIL2
FDFT1
CTSB
LONRF1
CNOT7
VPS37A
MTUS1
PCM1
ASAH1
INTS10
ATP6V1B2
XPO7
EPB49
FAM160B2
NUDT18
REEP4
BMP1
POLR3D
SLC39A14
PPP3CC
SORBS3
PDLIM2
C8orf58
KIAA1967
BIN3
CHMP7
ENTPD4
SLC25A37
DOCK5
KCTD9
PPP2R2A
BNIP3L
DPYSL2
TRIM35
PTK2B
CLU
CCDC25
ELP3
ZNF395
EXTL3
INTS9
KIF13B
TMEM66
LEPROTL1
DCTN6
RBPMS
GTF2E2
GSR
UBXD6
PPP2CB
MAK16
C8orf41
ERLIN2
PROSC
BRF2
EIF4EBP1
ASH2L
LSM1
BAG4
DDHD2
PPAPDC1B
WHSC1L1
TACC1
TM2D2
ADAM9
GOLGA7
AGPAT6
MYST3
AP3M2
IKBKB
POLB
VDAC3
SLC20A2
C8orf40
THAP1
RNF170
HOOK3
FNTA
HGSNAT
KIAA0146
CEBPD
PRKDC
MCM4
UBE2V2
PCMTD1
RB1CC1
ATP6V1H
TCEA1
LYPLA1
MRPL15
TGS1|TMEM68
RPS20
CHCHD7
IMPAD1
LOC137886
SDCBP
NSMAF
RAB2A
CHD7
ASPH
GGH
YTHDF3
ARMC1
MTFR1
RRS1
VCPIP1
COPS5
CSPP1
ARFGEF1
NCOA2
TRAM1
LACTB2
TERF1
STAU2
UBE2W
TCEB1
TMEM70
PXMP3
MRPS28
TPD52
ZBTB10
IMPA1
ZFAND1
SNX16
C8orf59
WWP1
FAM82B
CPNE3
OSGIN2
NBN
DECR1
TMEM64
OTUD6B
FAM92A1
RBM12B
KIAA1429
INTS8
C8orf38
UQCRB
MTERFD1
PTDSS1
SDC2
PGCP
MTDH
LAPTM4B
MATN2
RPL30
HRSP12
VPS13B
COX6C
POLR2K
RNF19A
ANKRD46
PABPC1
YWHAZ
ZNF706
UBR5
KLF10
AZIN1
ATP6V1C1
SLC25A32|WDSOF1
OXR1
EIF3E
TTC35
NUDCD1
ENY2
EBAG9
GOLSYN
EIF3H
C8orf53
RAD21
MED30
EXT1
TAF2
DEPDC6
MRPL13
ZHX2
DERL1
C8orf76
ZHX1
C8orf32
FBXO32
FAM91A1
TRMT12
RNF139
TATDN1
NDUFB9
KIAA0196
NSMCE2
TRIB1
MYC
FAM49B
DDEF1
EFR3A
PHF20L1
NDRG1
ST3GAL1
NIBP
CHRAC1
EIF2C2
PTK2
PTP4A3
C8orf55
LY6E
GLI4
TOP1MT
ZC3H3
NAPRT1
EEF1D
PYCRL
TSTA3
ZNF623
SCRIB
PUF60
NRBP2
[truncated: 5,899 more rows]
