# Supplementary material for: An Abundance of Ubiquitously Expressed Genes Revealed by Tissue Transcriptome Sequence Data
Source: PLoS Comput Biol. 2009 Dec 11;5(12):e1000598. doi: 10.1371/journal.pcbi.1000598 (PMC2781110; doi:10.1371/journal.pcbi.1000598)
Supplement: Dataset S3 — Enriched gene ontology categories among non-ubiquitous genes (0.14 MB XLS) [file pcbi.1000598.s010.xls]

## Sheet: Sheet1
Dataset S3. Enriched gene ontology categories among non-ubiquitous genes
Category	Term	Count	Total genes in category	Benjamini-Hochberg corrected p-values	Fraction non-ubiquitous
BIOCARTA	h_intrinsicPathway:Intrinsic Prothrombin Activation Pathway	16	16	0.0115927	1
SP_PIR_KEYWORDS	sodium channel	25	25	0.000125577	1
GOTERM_BP_ALL	GO:0007223~Wnt receptor signaling pathway, calcium modulating pathway	20	20	0.00453217	1
SP_PIR_KEYWORDS	intestine	24	24	0.00021164	1
GOTERM_MF_ALL	GO:0004970~ionotropic glutamate receptor activity	16	16	0.0296355	1
INTERPRO	IPR006028:Gamma-aminobutyric acid A receptor	18	18	0.0248593	1
GOTERM_BP_ALL	GO:0050909~sensory perception of taste	33	33	7.13036e-06	1
UP_SEQ_FEATURE	domain:C1q	21	21	0.0268991	1
GOTERM_MF_ALL	GO:0004984~olfactory receptor activity	356	356	1.5235e-87	1
PIR_SUPERFAMILY	PIRSF003152:olfactory receptor OR14	286	286	6.31523e-67	1
SP_PIR_KEYWORDS	taste	30	30	8.73998e-06	1
GOTERM_MF_ALL	GO:0005184~neuropeptide hormone activity	21	21	0.00248305	1
GOTERM_MF_ALL	GO:0016493~C-C chemokine receptor activity	15	15	0.0475162	1
SP_PIR_KEYWORDS	pancreas	15	15	0.0187476	1
SMART	SM00442:FGF	23	23	0.00226345	1
SP_PIR_KEYWORDS	ectodermal dysplasia	16	16	0.0117548	1
GOTERM_MF_ALL	GO:0005234~extracellular-glutamate-gated ion channel activity	17	17	0.0180611	1
GOTERM_MF_ALL	GO:0004890~GABA-A receptor activity	18	18	0.0113849	1
INTERPRO	IPR000827:Small chemokine, C-C	25	25	0.000958444	1
GOTERM_MF_ALL	GO:0004950~chemokine receptor activity	26	26	0.000205	1
INTERPRO	IPR005816:Secreted growth factor Wnt protein	19	19	0.0156396	1
INTERPRO	IPR012674:Calycin	32	32	2.96771e-05	1
INTERPRO	IPR002494:Keratin, high sulphur B2 protein	41	41	2.53599e-07	1
INTERPRO	IPR003968:Potassium channel, voltage dependent, Kv	27	27	0.000344864	1
INTERPRO	IPR013273:Peptidase M12B, ADAM-TS	22	22	0.00357443	1
INTERPRO	IPR000047:Helix-turn-helix motif, lambda-like repressor	64	64	9.48686e-13	1
INTERPRO	IPR000725:Olfactory receptor	339	339	4.10863e-82	1
UP_SEQ_FEATURE	short sequence motif:Antp-type hexapeptide	22	22	0.0188296	1
UP_SEQ_FEATURE	domain:Fibrinogen C-terminal	24	24	0.00748632	1
INTERPRO	IPR000233:Cadherin cytoplasmic region	19	19	0.0156396	1
PIR_SUPERFAMILY	PIRSF002406:vertebrate rhodopsin	79	79	3.30935e-15	1
SMART	SM00186:FBG	28	28	0.000267485	1
GOTERM_BP_ALL	GO:0042310~vasoconstriction	16	16	0.0282805	1
PIR_SUPERFAMILY	PIRSF002504:cadherin	22	22	0.03597	1
SP_PIR_KEYWORDS	neuropeptide	30	30	8.73998e-06	1
GOTERM_MF_ALL	GO:0005212~structural constituent of eye lens	18	18	0.0113849	1
GOTERM_MF_ALL	GO:0008066~glutamate receptor activity	37	37	6.64175e-07	1
GOTERM_BP_ALL	GO:0007589~fluid secretion	16	16	0.0282805	1
BIOCARTA	h_dcPathway:Dendritic cells in regulating TH1 and TH2 Development	21	21	0.001995	1
INTERPRO	IPR013099:Ion transport 2	24	24	0.00159705	1
GOTERM_CC_ALL	GO:0005891~voltage-gated calcium channel complex	21	21	0.00247501	1
SP_PIR_KEYWORDS	hormone	78	78	2.95632e-17	1
INTERPRO	IPR000566:Lipocalin-related protein and Bos/Can/Equ allergen	31	31	4.79597e-05	1
GOTERM_MF_ALL	GO:0008067~metabotropic glutamate, GABA-B-like receptor activity	21	21	0.00248305	1
INTERPRO	IPR005817:Wnt superfamily	19	19	0.0156396	1
INTERPRO	IPR002348:Interleukin 1/heparin-binding growth factor	23	23	0.00249587	1
SP_PIR_KEYWORDS	G protein-coupled receptor	112	112	1.01731e-25	1
INTERPRO	IPR003091:Voltage-dependent potassium channel	35	35	6.23846e-06	1
INTERPRO	IPR014716:Fibrinogen, alpha/beta/gamma chain, C-terminal globular, subdomain 1	21	21	0.0058287	1
SP_PIR_KEYWORDS	Eye lens protein	17	17	0.00721125	1
INTERPRO	IPR015492:Protocadherin gamma	21	21	0.0058287	1
INTERPRO	IPR001827:Homeobox protein, antennapedia type	24	24	0.00159705	1
SMART	SM00079:PBPe	16	16	0.0411967	1
SMART	SM00097:WNT1	19	19	0.0124143	1
INTERPRO	IPR001828:Extracellular ligand-binding receptor	31	31	4.79597e-05	1
SP_PIR_KEYWORDS	defensin	31	31	5.16532e-06	1
SP_PIR_KEYWORDS	amidation	36	36	3.41482e-07	1
SP_PIR_KEYWORDS	Thick filament	13	13	0.0480246	1
INTERPRO	IPR004020:Pyrin	18	18	0.0248593	1
SP_PIR_KEYWORDS	Potassium channel	73	73	4.91333e-16	1
INTERPRO	IPR007960:Mammalian taste receptor	23	23	0.00249587	1
SP_PIR_KEYWORDS	amidated carboxyl end	17	17	0.00721125	1
SP_PIR_KEYWORDS	antimicrobial	56	56	6.96188e-12	1
SMART	SM00076:IFabd	16	16	0.0411967	1
GOTERM_MF_ALL	GO:0019957~C-C chemokine binding	15	15	0.0475162	1
SP_PIR_KEYWORDS	antibiotic	55	55	1.16473e-11	1
PIR_SUPERFAMILY	PIRSF001135:trypsin	33	33	0.000216169	1
INTERPRO	IPR002181:Fibrinogen, alpha/beta/gamma chain, C-terminal globular	28	28	0.000215306	1
INTERPRO	IPR002209:Heparin-binding growth factor/Fibroblast growth factor	18	18	0.0248593	1
SP_PIR_KEYWORDS	antiviral	13	13	0.0480246	1
INTERPRO	IPR002353:Type II antifreeze protein	22	22	0.00357443	1
UP_SEQ_FEATURE	short sequence motif:Selectivity filter	52	52	3.90854e-09	1
PIR_SUPERFAMILY	PIRSF001950:small inducible chemokine, C/CC types	22	22	0.03597	1
UP_SEQ_FEATURE	region of interest:Segment H5 (pore-forming)	28	28	0.00117168	1
GOTERM_BP_ALL	GO:0048663~neuron fate commitment	17	17	0.0179317	1
GOTERM_MF_ALL	GO:0016917~GABA receptor activity	22	22	0.00156303	1
INTERPRO	IPR000337:GPCR, family 3	20	20	0.00961209	1
SP_PIR_KEYWORDS	olfaction	346	347	5.4023e-84	0.997118
GOTERM_BP_ALL	GO:0007606~sensory perception of chemical stimulus	401	404	4.46706e-93	0.992574
GOTERM_BP_ALL	GO:0007608~sensory perception of smell	366	369	3.49808e-84	0.99187
INTERPRO	IPR000276:Rhodopsin-like GPCR superfamily	619	625	6.94511e-145	0.9904
SP_PIR_KEYWORDS	g-protein coupled receptor	709	716	2.13249e-169	0.990223
UP_SEQ_FEATURE	domain:Cadherin 3	99	100	4.73738e-19	0.99
UP_SEQ_FEATURE	domain:Cadherin 4	99	100	4.73738e-19	0.99
UP_SEQ_FEATURE	domain:Cadherin 5	93	94	1.23321e-17	0.989362
GOTERM_BP_ALL	GO:0042742~defense response to bacterium	83	84	1.97041e-16	0.988095
UP_SEQ_FEATURE	domain:Peptidase S1	77	78	1.20015e-13	0.987179
UP_SEQ_FEATURE	domain:Cadherin 6	71	72	1.69365e-12	0.986111
GOTERM_MF_ALL	GO:0001584~rhodopsin-like receptor activity	675	686	1.6392e-153	0.983965
INTERPRO	IPR013164:Cadherin, N-terminal	61	62	5.84482e-11	0.983871
GOTERM_MF_ALL	GO:0001653~peptide receptor activity	111	113	3.37858e-22	0.982301
SP_PIR_KEYWORDS	neurotransmitter receptor	52	53	7.0342e-10	0.981132
INTERPRO	IPR001314:Peptidase S1A, chymotrypsin	92	94	3.72309e-17	0.978723
INTERPRO	IPR012351:Four-helical cytokine, core	43	44	8.00584e-07	0.977273
INTERPRO	IPR001811:Small chemokine, interleukin-8-like	41	42	2.28157e-06	0.97619
SMART	SM00199:SCY	41	42	3.64343e-06	0.97619
SP_PIR_KEYWORDS	blood coagulation	40	41	3.43832e-07	0.97561
GOTERM_MF_ALL	GO:0042923~neuropeptide binding	40	41	1.0579e-06	0.97561
GOTERM_MF_ALL	GO:0008188~neuropeptide receptor activity	39	40	1.63793e-06	0.975
SP_PIR_KEYWORDS	Keratin	116	119	4.97727e-23	0.97479
GOTERM_MF_ALL	GO:0004930~G-protein coupled receptor activity	758	778	2.88509e-163	0.974293
INTERPRO	IPR002126:Cadherin	107	110	1.94563e-19	0.972727
SMART	SM00112:CA	107	110	3.60295e-18	0.972727
UP_SEQ_FEATURE	domain:Cadherin 1	100	103	3.82477e-17	0.970874
UP_SEQ_FEATURE	domain:Cadherin 2	100	103	3.82477e-17	0.970874
GOTERM_MF_ALL	GO:0005179~hormone activity	99	102	2.45677e-18	0.970588
SMART	SM00020:Tryp_SPc	97	100	3.4923e-16	0.97
INTERPRO	IPR001254:Peptidase S1 and S6, chymotrypsin/Hap	97	100	2.77217e-17	0.97
SP_PIR_KEYWORDS	transducer	740	763	2.28083e-156	0.969856
UP_SEQ_FEATURE	domain:TSP type-1 2	31	32	0.00154666	0.96875
INTERPRO	IPR008085:Thrombospondin, subtype 1	31	32	0.000297322	0.96875
UP_SEQ_FEATURE	domain:TSP type-1 1	31	32	0.00154666	0.96875
KEGG_PATHWAY	hsa04080:Neuroactive ligand-receptor interaction	235	243	5.31172e-47	0.967078
GOTERM_MF_ALL	GO:0005272~sodium channel activity	29	30	0.000262702	0.966667
GOTERM_MF_ALL	GO:0016712~oxidoreductase activity, acting on paired donors, with incorporation or reduction of molecular oxygen, reduced flavin or flavoprotein as one donor, and incorporation of one atom of oxygen	28	29	0.000435835	0.965517
GOTERM_MF_ALL	GO:0019956~chemokine binding	27	28	0.000712583	0.964286
GOTERM_MF_ALL	GO:0001608~nucleotide receptor activity, G-protein coupled	27	28	0.000712583	0.964286
GOTERM_MF_ALL	GO:0016502~nucleotide receptor activity	27	28	0.000712583	0.964286
SMART	SM00008:HormR	26	27	0.00284105	0.962963
GOTERM_BP_ALL	GO:0000270~peptidoglycan metabolic process	26	27	0.00135768	0.962963
INTERPRO	IPR001879:Hormone receptor, extracellular	26	27	0.0027535	0.962963
UP_SEQ_FEATURE	region of interest:Connecting peptide	26	27	0.0140407	0.962963
INTERPRO	IPR001073:Complement C1q protein	26	27	0.0027535	0.962963
SMART	SM00110:C1Q	26	27	0.00284105	0.962963
INTERPRO	IPR008161:Collagen helix repeat	50	52	1.49811e-07	0.961538
UP_SEQ_FEATURE	domain:Ig-like C2-type 6	25	26	0.02076	0.961538
INTERPRO	IPR003054:Type II keratin	25	26	0.00418072	0.961538
SP_PIR_KEYWORDS	hormone receptor	24	25	0.0011336	0.96
KEGG_PATHWAY	hsa04950:Maturity onset diabetes of the young	24	25	0.00182536	0.96
GOTERM_MF_ALL	GO:0005245~voltage-gated calcium channel activity	24	25	0.00281666	0.96
GOTERM_MF_ALL	GO:0050381~unspecific monooxygenase activity	24	25	0.00281666	0.96
UP_SEQ_FEATURE	domain:Collagen-like	24	25	0.0304132	0.96
BBID	109.Chemokine_families	24	25	0.00134032	0.96
GOTERM_MF_ALL	GO:0042165~neurotransmitter binding	92	96	8.4863e-16	0.958333
GOTERM_MF_ALL	GO:0042379~chemokine receptor binding	46	48	3.42383e-07	0.958333
GOTERM_MF_ALL	GO:0008009~chemokine activity	46	48	3.42383e-07	0.958333
GOTERM_BP_ALL	GO:0044236~multicellular organismal metabolic process	23	24	0.00497343	0.958333
SP_PIR_KEYWORDS	voltage-gated channel	135	141	1.41134e-24	0.957447
SMART	SM00202:SR	22	23	0.0128813	0.956522
GOTERM_MF_ALL	GO:0030594~neurotransmitter receptor activity	88	92	1.15463e-14	0.956522
INTERPRO	IPR001190:Speract/scavenger receptor	22	23	0.0164196	0.956522
INTERPRO	IPR010294:ADAM-TS Spacer 1	21	22	0.025245	0.954545
INTERPRO	IPR002286:P2 purinoceptor	21	22	0.025245	0.954545
SP_PIR_KEYWORDS	plasma	82	86	4.61853e-14	0.953488
GOTERM_BP_ALL	GO:0007586~digestion	80	84	6.4404e-13	0.952381
GOTERM_MF_ALL	GO:0005326~neurotransmitter transporter activity	20	21	0.0183843	0.952381
GOTERM_MF_ALL	GO:0001633~secretin-like receptor activity	20	21	0.0183843	0.952381
GOTERM_BP_ALL	GO:0007218~neuropeptide signaling pathway	80	84	6.4404e-13	0.952381
GOTERM_BP_ALL	GO:0032963~collagen metabolic process	20	21	0.0179521	0.952381
GOTERM_BP_ALL	GO:0044243~multicellular organismal catabolic process	20	21	0.0179521	0.952381
BIOCARTA	h_eicosanoidPathway:Eicosanoid Metabolism	20	21	0.00746517	0.952381
GOTERM_BP_ALL	GO:0044268~multicellular organismal protein metabolic process	19	20	0.0277858	0.95
GOTERM_BP_ALL	GO:0044256~protein digestion	19	20	0.0277858	0.95
GOTERM_BP_ALL	GO:0030574~collagen catabolic process	19	20	0.0277858	0.95
GOTERM_MF_ALL	GO:0042166~acetylcholine binding	19	20	0.0288065	0.95
GOTERM_BP_ALL	GO:0044259~multicellular organismal macromolecule metabolic process	19	20	0.0277858	0.95
INTERPRO	IPR006029:Neurotransmitter-gated ion-channel transmembrane region	38	40	5.19113e-05	0.95
GOTERM_BP_ALL	GO:0044266~multicellular organismal macromolecule catabolic process	19	20	0.0277858	0.95
GOTERM_BP_ALL	GO:0007530~sex determination	19	20	0.0277858	0.95
GOTERM_BP_ALL	GO:0044254~multicellular organismal protein catabolic process	19	20	0.0277858	0.95
UP_SEQ_FEATURE	domain:Ig-like C2-type 5	38	40	0.000321374	0.95
GOTERM_MF_ALL	GO:0015464~acetylcholine receptor activity	18	19	0.0448604	0.947368
GOTERM_BP_ALL	GO:0007193~G-protein signaling, adenylate cyclase inhibiting pathway	18	19	0.0419044	0.947368
INTERPRO	IPR008160:Collagen triple helix repeat	72	76	7.90342e-11	0.947368
GOTERM_BP_ALL	GO:0006641~triacylglycerol metabolic process	18	19	0.0419044	0.947368
SP_PIR_KEYWORDS	cgmp	18	19	0.0174469	0.947368
SP_PIR_KEYWORDS	sensory transduction	481	508	2.24795e-87	0.94685
SP_PIR_KEYWORDS	sulfation	35	37	2.38518e-05	0.945946
GOTERM_MF_ALL	GO:0019825~oxygen binding	35	37	6.97961e-05	0.945946
GOTERM_MF_ALL	GO:0001664~G-protein-coupled receptor binding	69	73	1.04935e-10	0.945205
GOTERM_MF_ALL	GO:0022834~ligand-gated channel activity	85	90	1.94733e-13	0.944444
GOTERM_MF_ALL	GO:0015276~ligand-gated ion channel activity	85	90	1.94733e-13	0.944444
UP_SEQ_FEATURE	DNA-binding region:Homeobox	132	140	7.98351e-20	0.942857
INTERPRO	IPR012680:Laminin G, subdomain 2	33	35	0.000517379	0.942857
INTERPRO	IPR005821:Ion transport	99	105	3.27297e-15	0.942857
GOTERM_BP_ALL	GO:0031424~keratinization	33	35	0.000238334	0.942857
UP_SEQ_FEATURE	domain:Ig-like C2-type 4	48	51	1.42585e-05	0.941176
GOTERM_MF_ALL	GO:0043168~anion binding	48	51	6.56847e-07	0.941176
SP_PIR_KEYWORDS	collagen degradation	16	17	0.0427513	0.941176
GOTERM_MF_ALL	GO:0031404~chloride ion binding	48	51	6.56847e-07	0.941176
GOTERM_CC_ALL	GO:0045095~keratin filament	47	50	9.77893e-07	0.94
PIR_SUPERFAMILY	PIRSF002443:acetylcholine receptor	31	33	0.013462	0.939394
BIOCARTA	h_stemPathway:Regulation of hematopoiesis by cytokines	15	16	0.0485409	0.9375
KEGG_PATHWAY	hsa04610:Complement and coagulation cascades	60	64	5.90968e-09	0.9375
GOTERM_BP_ALL	GO:0007204~elevation of cytosolic calcium ion concentration	60	64	1.46999e-08	0.9375
GOTERM_BP_ALL	GO:0051480~cytosolic calcium ion homeostasis	60	64	1.46999e-08	0.9375
INTERPRO	IPR002401:Cytochrome P450, E-class, group I	44	47	1.42786e-05	0.93617
INTERPRO	IPR002957:Keratin, type I	44	47	1.42786e-05	0.93617
SP_PIR_KEYWORDS	gpi-anchor	102	109	3.35847e-16	0.93578
GOTERM_BP_ALL	GO:0007186~G-protein coupled receptor protein signaling pathway	900	962	1.72545e-156	0.935551
GOTERM_MF_ALL	GO:0005230~extracellular ligand-gated ion channel activity	58	62	2.53834e-08	0.935484
INTERPRO	IPR000863:Sulphotransferase	29	31	0.00276433	0.935484
GOTERM_MF_ALL	GO:0005044~scavenger receptor activity	29	31	0.0011411	0.935484
SP_PIR_KEYWORDS	potassium transport	100	107	8.73755e-16	0.934579
INTERPRO	IPR001304:C-type lectin	71	76	6.73922e-10	0.934211
SMART	SM00034:CLECT	71	76	3.10572e-09	0.934211
GOTERM_BP_ALL	GO:0002274~myeloid leukocyte activation	28	30	0.00213327	0.933333
SP_PIR_KEYWORDS	hydroxylysine	28	30	0.000705376	0.933333
GOTERM_MF_ALL	GO:0004888~transmembrane receptor activity	1074	1152	8.17029e-187	0.932292
UP_SEQ_FEATURE	domain:EGF-like 2	55	59	2.34016e-06	0.932203
GOTERM_BP_ALL	GO:0009584~detection of visible light	27	29	0.00313457	0.931034
GOTERM_BP_ALL	GO:0008217~regulation of blood pressure	53	57	3.85864e-07	0.929825
UP_SEQ_FEATURE	domain:Ig-like V-type	66	71	5.39327e-08	0.929577
GOTERM_BP_ALL	GO:0006817~phosphate transport	79	85	3.27641e-11	0.929412
INTERPRO	IPR008983:Tumour necrosis factor-like	39	42	0.000140065	0.928571
GOTERM_BP_ALL	GO:0007187~G-protein signaling, coupled to cyclic nucleotide second messenger	104	112	4.49243e-15	0.928571
SP_PIR_KEYWORDS	acute phase	26	28	0.00173018	0.928571
GOTERM_BP_ALL	GO:0050962~detection of light stimulus during sensory perception	26	28	0.00476005	0.928571
GOTERM_BP_ALL	GO:0050908~detection of light stimulus during visual perception	26	28	0.00476005	0.928571
INTERPRO	IPR000832:GPCR, family 2, secretin-like	51	55	2.38602e-06	0.927273
SP_PIR_KEYWORDS	cytokine	165	178	1.17e-25	0.926966
INTERPRO	IPR006201:Neurotransmitter-gated ion-channel	38	41	0.000218729	0.926829
GOTERM_MF_ALL	GO:0008227~amine receptor activity	38	41	7.05301e-05	0.926829
UP_SEQ_FEATURE	lipid moiety-binding region:GPI-anchor amidated serine	38	41	0.00120388	0.926829
GOTERM_BP_ALL	GO:0007156~homophilic cell adhesion	126	136	2.21321e-18	0.926471
GOTERM_BP_ALL	GO:0009617~response to bacterium	88	95	2.05125e-12	0.926316
INTERPRO	IPR006026:Peptidase, metallopeptidases	25	27	0.0158572	0.925926
SMART	SM00235:ZnMc	25	27	0.0133308	0.925926
INTERPRO	IPR006202:Neurotransmitter-gated ion-channel ligand-binding	37	40	0.000328203	0.925
SP_PIR_KEYWORDS	chemotaxis	60	65	1.43322e-08	0.923077
GOTERM_BP_ALL	GO:0007602~phototransduction	24	26	0.0114695	0.923077
SP_PIR_KEYWORDS	Ionic channel	263	285	1.12817e-40	0.922807
UP_SEQ_FEATURE	domain:Ig-like C2-type 2	118	128	1.68424e-15	0.921875
UP_SEQ_FEATURE	domain:Ig-like C2-type 1	118	128	1.68424e-15	0.921875
GOTERM_BP_ALL	GO:0016339~calcium-dependent cell-cell adhesion	23	25	0.0162922	0.92
KEGG_PATHWAY	hsa04742:Taste transduction	46	50	4.0581e-06	0.92
INTERPRO	IPR000372:Leucine-rich repeat, cysteine-rich flanking region, N-terminal	78	85	5.13079e-10	0.917647
SMART	SM00013:LRRNT	78	85	3.08814e-09	0.917647
INTERPRO	IPR001839:Transforming growth factor beta	33	36	0.00190074	0.916667
UP_SEQ_FEATURE	domain:C-type lectin	44	48	0.000331524	0.916667
SMART	SM00120:HX	22	24	0.0410265	0.916667
INTERPRO	IPR002870:Peptidase M12B, propeptide	33	36	0.00190074	0.916667
SMART	SM00204:TGFB	33	36	0.00224921	0.916667
GOTERM_CC_ALL	GO:0005581~collagen	33	36	0.000654655	0.916667
GOTERM_CC_ALL	GO:0005921~gap junction	22	24	0.0240686	0.916667
KEGG_PATHWAY	hsa04940:Type I diabetes mellitus	33	36	0.000423034	0.916667
UP_SEQ_FEATURE	region of interest:Head	33	36	0.00929515	0.916667
SP_PIR_KEYWORDS	collagen	76	83	1.29118e-10	0.915663
GOTERM_BP_ALL	GO:0019935~cyclic-nucleotide-mediated signaling	108	118	1.63203e-14	0.915254
SP_PIR_KEYWORDS	Serine protease inhibitor	54	59	2.22965e-07	0.915254
GOTERM_BP_ALL	GO:0006939~smooth muscle contraction	32	35	0.00131335	0.914286
GOTERM_BP_ALL	GO:0042446~hormone biosynthetic process	32	35	0.00131335	0.914286
UP_SEQ_FEATURE	region of interest:Rod	32	35	0.0141472	0.914286
UP_SEQ_FEATURE	domain:Fibronectin type-III	32	35	0.0141472	0.914286
SP_PIR_KEYWORDS	heparin binding	21	23	0.0146969	0.913043
SP_PIR_KEYWORDS	chloride	42	46	1.45944e-05	0.913043
GOTERM_BP_ALL	GO:0007188~G-protein signaling, coupled to cAMP nucleotide second messenger	73	80	2.62625e-09	0.9125
SMART	SM00209:TSP1	52	57	1.22921e-05	0.912281
UP_SEQ_FEATURE	region of interest:Linker 1	31	34	0.0199757	0.911765
GOTERM_BP_ALL	GO:0007189~G-protein signaling, adenylate cyclase activating pathway	31	34	0.00195031	0.911765
GOTERM_BP_ALL	GO:0008037~cell recognition	31	34	0.00195031	0.911765
GOTERM_MF_ALL	GO:0043176~amine binding	31	34	0.00163877	0.911765
UP_SEQ_FEATURE	region of interest:Coil 1B	31	34	0.0199757	0.911765
UP_SEQ_FEATURE	region of interest:Coil 1A	31	34	0.0199757	0.911765
INTERPRO	IPR001356:Homeobox	175	192	1.53878e-23	0.911458
SMART	SM00389:HOX	175	192	2.73197e-21	0.911458
SP_PIR_KEYWORDS	pyroglutamic acid	41	45	2.31837e-05	0.911111
UP_SEQ_FEATURE	domain:Ig-like C2-type 3	82	90	2.60717e-09	0.911111
INTERPRO	IPR000884:Thrombospondin, type I	51	56	9.29784e-06	0.910714
GOTERM_MF_ALL	GO:0048503~GPI anchor binding	102	112	1.45439e-13	0.910714
SP_PIR_KEYWORDS	inflammation	20	22	0.0220731	0.909091
GOTERM_MF_ALL	GO:0004907~interleukin receptor activity	30	33	0.0024959	0.909091
SP_PIR_KEYWORDS	Gap junction	20	22	0.0220731	0.909091
INTERPRO	IPR001818:Peptidase M10A and M12B, matrixin and adamalysin	40	44	0.000312073	0.909091
BIOCARTA	h_cytokinePathway:Cytokine Network	20	22	0.0148106	0.909091
GOTERM_MF_ALL	GO:0015370~solute:sodium symporter activity	40	44	0.000105405	0.909091
SP_PIR_KEYWORDS	hydroxyproline	30	33	0.000985901	0.909091
SP_PIR_KEYWORDS	Homeobox	178	196	4.83764e-25	0.908163
SP_PIR_KEYWORDS	Cleavage on pair of basic residues	215	237	3.46583e-30	0.907173
GOTERM_BP_ALL	GO:0003018~vascular process in circulatory system	39	43	0.000221034	0.906977
INTERPRO	IPR015615:Transforming growth factor-beta-related	29	32	0.00889376	0.90625
UP_SEQ_FEATURE	region of interest:Linker 12	29	32	0.041056	0.90625
GOTERM_BP_ALL	GO:0042472~inner ear morphogenesis	29	32	0.00425863	0.90625
INTERPRO	IPR013106:Immunoglobulin V-set	124	137	1.09273e-15	0.905109
SP_PIR_KEYWORDS	sodium transport	76	84	5.33297e-10	0.904762
GOTERM_BP_ALL	GO:0035150~regulation of tube size	38	42	0.000342159	0.904762
UP_SEQ_FEATURE	short sequence motif:Cysteine switch	38	42	0.00384185	0.904762
GOTERM_BP_ALL	GO:0050880~regulation of blood vessel size	38	42	0.000342159	0.904762
INTERPRO	IPR001664:Intermediate filament protein	66	73	1.49543e-07	0.90411
GOTERM_CC_ALL	GO:0005882~intermediate filament	141	156	9.60931e-19	0.903846
GOTERM_CC_ALL	GO:0045111~intermediate filament cytoskeleton	141	156	9.60931e-19	0.903846
BIOCARTA	h_nuclearRsPathway:Nuclear Receptors in Lipid Metabolism and Toxicity	28	31	0.00137832	0.903226
SP_PIR_KEYWORDS	intermediate filament	65	72	2.05065e-08	0.902778
INTERPRO	IPR013098:Immunoglobulin I-set	102	113	2.09721e-12	0.902655
INTERPRO	IPR003599:Immunoglobulin subtype	249	276	1.0199e-32	0.902174
SMART	SM00082:LRRCT	73	81	8.82322e-08	0.901235
GOTERM_BP_ALL	GO:0006805~xenobiotic metabolic process	27	30	0.00975258	0.9
SMART	SM00282:LamG	36	40	0.0022578	0.9
SP_PIR_KEYWORDS	triple helix	27	30	0.00330525	0.9
GOTERM_BP_ALL	GO:0009583~detection of light stimulus	27	30	0.00975258	0.9
GOTERM_CC_ALL	GO:0042611~MHC protein complex	27	30	0.00852072	0.9
INTERPRO	IPR001791:Laminin G	36	40	0.00169753	0.9
SMART	SM00408:IGc2	160	178	4.56851e-18	0.898876
GOTERM_BP_ALL	GO:0048732~gland development	44	49	8.32413e-05	0.897959
SMART	SM00050:DISIN	35	39	0.00263765	0.897436
GOTERM_MF_ALL	GO:0019965~interleukin binding	35	39	0.000917492	0.897436
GOTERM_BP_ALL	GO:0007588~excretion	35	39	0.00117612	0.897436
GOTERM_BP_ALL	GO:0009190~cyclic nucleotide biosynthetic process	26	29	0.0139103	0.896552
SMART	SM00409:IG	260	290	1.50616e-29	0.896552
INTERPRO	IPR000483:Cysteine-rich flanking region, C-terminal	69	77	1.44172e-07	0.896104
INTERPRO	IPR003598:Immunoglobulin subtype 2	154	172	1.28481e-18	0.895349
SP_PIR_KEYWORDS	chloride channel	34	38	0.000549801	0.894737
INTERPRO	IPR001590:Peptidase M12B, ADAM/reprolysin	34	38	0.00332552	0.894737
GOTERM_BP_ALL	GO:0007631~feeding behavior	34	38	0.00169307	0.894737
INTERPRO	IPR001762:Blood coagulation inhibitor, Disintegrin	34	38	0.00332552	0.894737
SP_PIR_KEYWORDS	chromoprotein	51	57	3.13815e-06	0.894737
SMART	SM00280:KAZAL	34	38	0.00379997	0.894737
INTERPRO	IPR008957:Fibronectin, type III-like fold	144	161	2.69634e-17	0.89441
GOTERM_BP_ALL	GO:0019933~cAMP-mediated signaling	75	84	1.47709e-08	0.892857
SP_PIR_KEYWORDS	inflammatory response	58	65	4.46734e-07	0.892308
UP_SEQ_FEATURE	domain:Disintegrin	33	37	0.0246554	0.891892
GOTERM_BP_ALL	GO:0046879~hormone secretion	33	37	0.00250822	0.891892
UP_SEQ_FEATURE	domain:Peptidase M12B	33	37	0.0246554	0.891892
INTERPRO	IPR002350:Proteinase inhibitor I1, Kazal	33	37	0.00488757	0.891892
UP_SEQ_FEATURE	region of interest:Tail	33	37	0.0246554	0.891892
SP_PIR_KEYWORDS	monooxygenase	66	74	4.58134e-08	0.891892
GOTERM_MF_ALL	GO:0031402~sodium ion binding	82	92	1.48217e-09	0.891304
GOTERM_MF_ALL	GO:0005254~chloride channel activity	41	46	0.00022221	0.891304
INTERPRO	IPR000436:Sushi/SCR/CCP	41	46	0.000634986	0.891304
SMART	SM00032:CCP	41	46	0.000967157	0.891304
GOTERM_BP_ALL	GO:0051606~detection of stimulus	65	73	3.36711e-07	0.890411
SP_PIR_KEYWORDS	Secreted	1177	1322	1.35884e-164	0.890318
SP_PIR_KEYWORDS	Calcium channel	48	54	1.15195e-05	0.888889
SP_PIR_KEYWORDS	sushi	40	45	0.000123487	0.888889
GOTERM_BP_ALL	GO:0051339~regulation of lyase activity	32	36	0.00362193	0.888889
GOTERM_CC_ALL	GO:0014704~intercalated disc	32	36	0.0031393	0.888889
GOTERM_BP_ALL	GO:0048730~epidermis morphogenesis	48	54	4.77546e-05	0.888889
UP_SEQ_FEATURE	domain:EGF-like	48	54	0.000646942	0.888889
GOTERM_BP_ALL	GO:0031279~regulation of cyclase activity	32	36	0.00362193	0.888889
SP_PIR_KEYWORDS	immunoglobulin domain	318	358	1.04692e-40	0.888268
INTERPRO	IPR013151:Immunoglobulin	159	179	1.59825e-18	0.888268
UP_SEQ_FEATURE	topological domain:Extracellular	1699	1913	3.18636e-244	0.888134
INTERPRO	IPR007110:Immunoglobulin-like	316	356	1.39338e-38	0.88764
GOTERM_CC_ALL	GO:0005615~extracellular space	436	492	2.9337e-55	0.886179
GOTERM_BP_ALL	GO:0045761~regulation of adenylate cyclase activity	31	35	0.00523554	0.885714
GOTERM_BP_ALL	GO:0042471~ear morphogenesis	31	35	0.00523554	0.885714
UP_SEQ_FEATURE	glycosylation site:O-linked (GalNAc...)	54	61	0.000182425	0.885246
UP_SEQ_FEATURE	propeptide:Activation peptide	54	61	0.000182425	0.885246
SP_PIR_KEYWORDS	sodium	69	78	4.09242e-08	0.884615
GOTERM_MF_ALL	GO:0022836~gated channel activity	245	277	1.26263e-29	0.884477
GOTERM_BP_ALL	GO:0050906~detection of stimulus during sensory perception	38	43	0.000988584	0.883721
SP_PIR_KEYWORDS	hydroxylation	53	60	4.1795e-06	0.883333
INTERPRO	IPR001128:Cytochrome P450	53	60	4.21486e-05	0.883333
GOTERM_MF_ALL	GO:0031420~alkali metal ion binding	174	197	1.7556e-20	0.883249
GOTERM_MF_ALL	GO:0005262~calcium channel activity	60	68	1.78553e-06	0.882353
GOTERM_CC_ALL	GO:0019861~flagellum	30	34	0.00706216	0.882353
GOTERM_BP_ALL	GO:0042330~taxis	120	136	1.85629e-13	0.882353
SP_PIR_KEYWORDS	extracellular matrix	180	204	6.7394e-22	0.882353
GOTERM_BP_ALL	GO:0009410~response to xenobiotic stimulus	30	34	0.00794298	0.882353
GOTERM_BP_ALL	GO:0006935~chemotaxis	120	136	1.85629e-13	0.882353
SP_PIR_KEYWORDS	neurotransmitter transport	30	34	0.00271539	0.882353
GOTERM_BP_ALL	GO:0015698~inorganic anion transport	126	143	5.86198e-14	0.881119
INTERPRO	IPR003962:Fibronectin, type III subdomain	37	42	0.00279959	0.880952
UP_SEQ_FEATURE	disulfide bond	1816	2062	2.44114e-253	0.880698
BIOCARTA	h_nktPathway:Selective expression of chemokine receptors during T-cell polarization	22	25	0.0130371	0.88
SP_PIR_KEYWORDS	potassium	102	116	7.80109e-12	0.87931
GOTERM_CC_ALL	GO:0044421~extracellular region part	662	753	4.28558e-82	0.87915
INTERPRO	IPR013162:CD80-like, immunoglobulin C2-set	29	33	0.0244657	0.878788
GOTERM_BP_ALL	GO:0006956~complement activation	29	33	0.0116772	0.878788
GOTERM_BP_ALL	GO:0035270~endocrine system development	29	33	0.0116772	0.878788
GOTERM_BP_ALL	GO:0002541~activation of plasma proteins during acute inflammatory response	29	33	0.0116772	0.878788
GOTERM_BP_ALL	GO:0009913~epidermal cell differentiation	43	49	0.000377524	0.877551
PIR_SUPERFAMILY	PIRSF002282:cytoskeletal keratin	50	57	0.00183014	0.877193
SP_PIR_KEYWORDS	protease inhibitor	71	81	5.27135e-08	0.876543
GOTERM_CC_ALL	GO:0005576~extracellular region	975	1113	6.30263e-122	0.876011
SMART	SM00303:GPS	28	32	0.0310336	0.875
GOTERM_BP_ALL	GO:0048839~inner ear development	35	40	0.00303718	0.875
INTERPRO	IPR000203:GPS	28	32	0.0350901	0.875
GOTERM_MF_ALL	GO:0030955~potassium ion binding	105	120	2.27237e-11	0.875
INTERPRO	IPR003961:Fibronectin, type III	144	165	3.17287e-15	0.872727
SMART	SM00060:FN3	144	165	1.44773e-13	0.872727
GOTERM_BP_ALL	GO:0009581~detection of external stimulus	41	47	0.000813341	0.87234
GOTERM_BP_ALL	GO:0055065~metal ion homeostasis	109	125	2.07212e-11	0.872
GOTERM_BP_ALL	GO:0006875~cellular metal ion homeostasis	109	125	2.07212e-11	0.872
KEGG_PATHWAY	hsa04060:Cytokine-cytokine receptor interaction	223	256	8.15666e-26	0.871094
GOTERM_BP_ALL	GO:0007600~sensory perception	647	743	1.4753e-75	0.870794
GOTERM_BP_ALL	GO:0006874~cellular calcium ion homeostasis	101	116	2.12438e-10	0.87069
GOTERM_BP_ALL	GO:0055074~calcium ion homeostasis	101	116	2.12438e-10	0.87069
KEGG_PATHWAY	hsa01430:Cell Communication	113	130	4.48541e-12	0.869231
GOTERM_MF_ALL	GO:0022838~substrate specific channel activity	304	350	1.17192e-33	0.868571
SP_PIR_KEYWORDS	pharmaceutical	33	38	0.00222232	0.868421
KEGG_PATHWAY	hsa00590:Arachidonic acid metabolism	46	53	0.000145439	0.867925
GOTERM_BP_ALL	GO:0003013~circulatory system process	138	159	1.58762e-14	0.867925
GOTERM_BP_ALL	GO:0008015~blood circulation	138	159	1.58762e-14	0.867925
INTERPRO	IPR013783:Immunoglobulin-like fold	333	384	4.49037e-36	0.867188
GOTERM_MF_ALL	GO:0005261~cation channel activity	215	248	3.28942e-23	0.866935
GOTERM_CC_ALL	GO:0009897~external side of plasma membrane	52	60	5.6587e-05	0.866667
SP_PIR_KEYWORDS	lectin	117	135	1.14997e-12	0.866667
GOTERM_MF_ALL	GO:0004629~phospholipase C activity	26	30	0.0347886	0.866667
BIOCARTA	h_inflamPathway:Cytokines and Inflammatory Response	26	30	0.0073291	0.866667
SP_PIR_KEYWORDS	receptor	1201	1386	1.4788e-146	0.866522
KEGG_PATHWAY	hsa04640:Hematopoietic cell lineage	71	82	2.74922e-07	0.865854
GOTERM_MF_ALL	GO:0005216~ion channel activity	295	341	6.09893e-32	0.865103
INTERPRO	IPR012287:Homeodomain-related	172	199	2.06708e-17	0.864322
GOTERM_BP_ALL	GO:0043583~ear development	38	44	0.00247749	0.863636
GOTERM_BP_ALL	GO:0006814~sodium ion transport	95	110	2.61198e-09	0.863636
GOTERM_MF_ALL	GO:0022843~voltage-gated cation channel activity	120	139	3.31468e-12	0.863309
SP_PIR_KEYWORDS	liver	44	51	0.000185246	0.862745
SP_PIR_KEYWORDS	growth factor	105	122	6.28732e-11	0.860656
GOTERM_MF_ALL	GO:0019955~cytokine binding	74	86	4.33382e-07	0.860465
GOTERM_MF_ALL	GO:0005267~potassium channel activity	110	128	7.29155e-11	0.859375
GOTERM_CC_ALL	GO:0045211~postsynaptic membrane	85	99	3.40718e-08	0.858586
SP_PIR_KEYWORDS	phosphatidylinositol linkage	24	28	0.0285744	0.857143
SP_PIR_KEYWORDS	Symport	72	84	2.84073e-07	0.857143
GOTERM_MF_ALL	GO:0004867~serine-type endopeptidase inhibitor activity	72	84	9.24552e-07	0.857143
COG_ONTOLOGY	Defense mechanisms	30	35	0.00075273	0.857143
GOTERM_BP_ALL	GO:0007565~female pregnancy	54	63	9.03874e-05	0.857143
GOTERM_BP_ALL	GO:0006959~humoral immune response	59	69	3.4847e-05	0.855072
INTERPRO	IPR006209:EGF-like	111	130	4.71234e-10	0.853846
KEGG_PATHWAY	hsa04514:Cell adhesion molecules (CAMs)	99	116	1.63355e-09	0.853448
GOTERM_CC_ALL	GO:0005578~proteinaceous extracellular matrix	262	307	1.67703e-26	0.85342
SP_PIR_KEYWORDS	Postsynaptic cell membrane	75	88	2.27901e-07	0.852273
UP_SEQ_FEATURE	glycosylation site:N-linked (GlcNAc...)	2403	2820	1.47518e-304	0.852128
SP_PIR_KEYWORDS	serine protease	92	108	5.05268e-09	0.851852
GOTERM_MF_ALL	GO:0005244~voltage-gated ion channel activity	155	182	5.56631e-15	0.851648
GOTERM_MF_ALL	GO:0022832~voltage-gated channel activity	155	182	5.56631e-15	0.851648
SP_PIR_KEYWORDS	serine proteinase	40	47	0.00092586	0.851064
GOTERM_MF_ALL	GO:0005201~extracellular matrix structural constituent	74	87	1.07376e-06	0.850575
GOTERM_MF_ALL	GO:0015267~channel activity	318	374	1.46448e-31	0.850267
GOTERM_MF_ALL	GO:0022803~passive transmembrane transporter activity	318	374	1.46448e-31	0.850267
GOTERM_BP_ALL	GO:0042445~hormone metabolic process	68	80	6.65037e-06	0.85
GOTERM_CC_ALL	GO:0031012~extracellular matrix	265	312	3.64768e-26	0.849359
GOTERM_MF_ALL	GO:0005529~sugar binding	152	179	2.15383e-14	0.849162
UP_SEQ_FEATURE	short sequence motif:PDZ-binding	45	53	0.0124447	0.849057
INTERPRO	IPR013111:EGF, extracellular	45	53	0.00234347	0.849057
UP_SEQ_FEATURE	domain:Fibronectin type-III 1	73	86	4.02686e-05	0.848837
UP_SEQ_FEATURE	domain:Fibronectin type-III 2	73	86	4.02686e-05	0.848837
GOTERM_MF_ALL	GO:0005125~cytokine activity	195	230	1.42245e-18	0.847826
GOTERM_BP_ALL	GO:0009187~cyclic nucleotide metabolic process	33	39	0.0143719	0.846154
GOTERM_BP_ALL	GO:0019882~antigen processing and presentation	44	52	0.00153941	0.846154
GOTERM_MF_ALL	GO:0004872~receptor activity	1426	1686	4.54954e-155	0.845789
GOTERM_MF_ALL	GO:0001871~pattern binding	93	110	2.79461e-08	0.845455
GOTERM_BP_ALL	GO:0050877~neurological system process	888	1051	2.09438e-90	0.84491
SP_PIR_KEYWORDS	innate immunity	38	45	0.00194208	0.844444
UP_SEQ_FEATURE	metal ion-binding site:Iron (heme axial ligand)	65	77	0.000316797	0.844156
INTERPRO	IPR003006:Immunoglobulin/major histocompatibility complex motif	43	51	0.00420023	0.843137
GOTERM_BP_ALL	GO:0019722~calcium-mediated signaling	32	38	0.0198628	0.842105
GOTERM_MF_ALL	GO:0004714~transmembrane receptor protein tyrosine kinase activity	53	63	0.000240837	0.84127
SP_PIR_KEYWORDS	Proteoglycan	37	44	0.00273779	0.840909
GOTERM_BP_ALL	GO:0006820~anion transport	142	169	2.25009e-12	0.840237
GOTERM_BP_ALL	GO:0003001~generation of a signal involved in cell-cell signaling	63	75	4.50427e-05	0.84
UP_SEQ_FEATURE	domain:EGF-like 3	42	50	0.0308104	0.84
SP_PIR_KEYWORDS	tyrosine-specific protein kinase	42	50	0.0010094	0.84
GOTERM_BP_ALL	GO:0003008~system process	1094	1303	8.87159e-110	0.839601
SP_PIR_KEYWORDS	extracellular protein	26	31	0.030145	0.83871
GOTERM_MF_ALL	GO:0030414~protease inhibitor activity	109	130	2.22018e-09	0.838462
GOTERM_CC_ALL	GO:0044456~synapse part	93	111	6.52883e-08	0.837838
UP_SEQ_FEATURE	signal peptide	1837	2194	4.12278e-197	0.837284
GOTERM_MF_ALL	GO:0004866~endopeptidase inhibitor activity	108	129	3.2524e-09	0.837209
GOTERM_BP_ALL	GO:0008016~regulation of heart contraction	36	43	0.0114965	0.837209
GOTERM_BP_ALL	GO:0030198~extracellular matrix organization and biogenesis	41	49	0.00426844	0.836735
GOTERM_BP_ALL	GO:0016337~cell-cell adhesion	225	269	9.89144e-20	0.836431
GOTERM_BP_ALL	GO:0007411~axon guidance	51	61	0.000674455	0.836066
GOTERM_BP_ALL	GO:0006968~cellular defense response	56	67	0.000253941	0.835821
GOTERM_BP_ALL	GO:0007626~locomotory behavior	152	182	7.49512e-13	0.835165
SP_PIR_KEYWORDS	egf-like domain	162	194	1.58762e-14	0.835052
GOTERM_MF_ALL	GO:0008083~growth factor activity	136	163	1.46563e-11	0.834356
SP_PIR_KEYWORDS	Nucleosome core	30	36	0.0155091	0.833333
SP_PIR_KEYWORDS	Palmitate	145	174	7.62834e-13	0.833333
SP_PIR_KEYWORDS	basement membrane	25	30	0.0432995	0.833333
UP_SEQ_FEATURE	domain:EGF-like 1	65	78	0.00069993	0.833333
INTERPRO	IPR000742:EGF-like, type 3	140	168	2.64744e-11	0.833333
UP_SEQ_FEATURE	domain:Fibronectin type-III 3	45	54	0.0252489	0.833333
UP_SEQ_FEATURE	domain:Ig-like C2-type	60	72	0.00172318	0.833333
GOTERM_BP_ALL	GO:0009582~detection of abiotic stimulus	35	42	0.0153082	0.833333
SP_PIR_KEYWORDS	glycoprotein	2870	3449	0	0.832125
UP_SEQ_FEATURE	lipid moiety-binding region:S-palmitoyl cysteine	114	137	5.62433e-08	0.832117
GOTERM_BP_ALL	GO:0050878~regulation of body fluid levels	94	113	1.80855e-07	0.831858
GOTERM_MF_ALL	GO:0005249~voltage-gated potassium channel activity	84	101	8.93425e-07	0.831683
SP_PIR_KEYWORDS	cell adhesion	300	361	5.66822e-27	0.831025
GOTERM_CC_ALL	GO:0016324~apical plasma membrane	59	71	0.000136596	0.830986
GOTERM_BP_ALL	GO:0051046~regulation of secretion	49	59	0.00133024	0.830508
GOTERM_BP_ALL	GO:0009566~fertilization	44	53	0.003279	0.830189
GOTERM_BP_ALL	GO:0045087~innate immune response	83	100	1.9085e-06	0.83
GOTERM_MF_ALL	GO:0030247~polysaccharide binding	83	100	1.23626e-06	0.83
SMART	SM00181:EGF	146	176	4.4711e-10	0.829545
INTERPRO	IPR006210:EGF	146	176	1.63184e-11	0.829545
GOTERM_BP_ALL	GO:0043062~extracellular structure organization and biogenesis	73	88	1.44732e-05	0.829545
GOTERM_BP_ALL	GO:0045165~cell fate commitment	68	82	3.92054e-05	0.829268
GOTERM_BP_ALL	GO:0048729~tissue morphogenesis	63	76	0.000102795	0.828947
SP_PIR_KEYWORDS	calcium transport	63	76	2.39687e-05	0.828947
GOTERM_BP_ALL	GO:0007610~behavior	251	303	5.63607e-21	0.828383
UP_SEQ_FEATURE	topological domain:Cytoplasmic	1936	2341	9.82108e-197	0.826997
GOTERM_MF_ALL	GO:0005253~anion channel activity	43	52	0.00396921	0.826923
SP_PIR_KEYWORDS	signal	2144	2594	3.43832e-221	0.826523
GOTERM_BP_ALL	GO:0042098~T cell proliferation	38	46	0.0120122	0.826087
GOTERM_MF_ALL	GO:0008146~sulfotransferase activity	38	46	0.0113069	0.826087
GOTERM_MF_ALL	GO:0004497~monooxygenase activity	76	92	6.93082e-06	0.826087
GOTERM_BP_ALL	GO:0006813~potassium ion transport	128	155	5.21807e-10	0.825806
GOTERM_BP_ALL	GO:0051240~positive regulation of multicellular organismal process	80	97	5.83094e-06	0.824742
UP_SEQ_FEATURE	short sequence motif:Cell attachment site	61	74	0.00265117	0.824324
GOTERM_BP_ALL	GO:0007338~single fertilization	42	51	0.00644149	0.823529
GOTERM_BP_ALL	GO:0002526~acute inflammatory response	56	68	0.000569586	0.823529
GOTERM_MF_ALL	GO:0005539~glycosaminoglycan binding	79	96	5.25044e-06	0.822917
GOTERM_BP_ALL	GO:0007596~blood coagulation	74	90	2.29663e-05	0.822222
GOTERM_MF_ALL	GO:0046873~metal ion transmembrane transporter activity	245	298	6.80634e-20	0.822148
GOTERM_BP_ALL	GO:0006952~defense response	438	533	4.55395e-36	0.821764
INTERPRO	IPR007114:Major facilitator superfamily	69	84	0.000138392	0.821429
GOTERM_BP_ALL	GO:0051216~cartilage development	32	39	0.0410095	0.820513
GOTERM_BP_ALL	GO:0007267~cell-cell signaling	511	623	4.36569e-42	0.820225
SMART	SM00406:IGv	45	55	0.0131777	0.818182
GOTERM_BP_ALL	GO:0006821~chloride transport	36	44	0.0221192	0.818182
SP_PIR_KEYWORDS	transmembrane protein	476	583	1.99086e-39	0.816467
GOTERM_BP_ALL	GO:0006836~neurotransmitter transport	40	49	0.0124348	0.816327
SP_PIR_KEYWORDS	immune response	111	136	1.01295e-08	0.816176
GOTERM_BP_ALL	GO:0007423~sensory organ development	71	87	6.49811e-05	0.816092
GOTERM_CC_ALL	GO:0008076~voltage-gated potassium channel complex	71	87	4.94495e-05	0.816092
SP_PIR_KEYWORDS	heme	84	103	1.41444e-06	0.815534
GOTERM_BP_ALL	GO:0050817~coagulation	75	92	3.54968e-05	0.815217
SP_PIR_KEYWORDS	Vision	96	118	2.02924e-07	0.813559
GOTERM_BP_ALL	GO:0006816~calcium ion transport	87	107	5.20335e-06	0.813084
GOTERM_BP_ALL	GO:0060047~heart contraction	39	48	0.0166515	0.8125
GOTERM_MF_ALL	GO:0015294~solute:cation symporter activity	52	64	0.00168104	0.8125
GOTERM_BP_ALL	GO:0003015~heart process	39	48	0.0166515	0.8125
GOTERM_BP_ALL	GO:0008544~epidermis development	112	138	8.30459e-08	0.811594
GOTERM_CC_ALL	GO:0031226~intrinsic to plasma membrane	942	1162	5.59878e-77	0.810671
GOTERM_BP_ALL	GO:0007599~hemostasis	77	95	3.75339e-05	0.810526
GOTERM_BP_ALL	GO:0006954~inflammatory response	231	285	6.51393e-17	0.810526
GOTERM_CC_ALL	GO:0005887~integral to plasma membrane	929	1147	1.82214e-75	0.809939
SP_PIR_KEYWORDS	Muscle protein	38	47	0.00851044	0.808511
GOTERM_BP_ALL	GO:0007166~cell surface receptor linked signal transduction	1298	1607	4.93725e-107	0.807716
GOTERM_BP_ALL	GO:0045055~regulated secretory pathway	42	52	0.0127964	0.807692
SP_PIR_KEYWORDS	heparin-binding	46	57	0.00236884	0.807018
GOTERM_MF_ALL	GO:0020037~heme binding	96	119	1.33384e-06	0.806723
GOTERM_MF_ALL	GO:0046906~tetrapyrrole binding	96	119	1.33384e-06	0.806723
UP_SEQ_FEATURE	active site:Charge relay system	100	124	2.08675e-05	0.806452
GOTERM_BP_ALL	GO:0007268~synaptic transmission	229	284	2.93242e-16	0.806338
GOTERM_MF_ALL	GO:0030246~carbohydrate binding	233	289	6.98223e-17	0.806228
INTERPRO	IPR011701:Major facilitator superfamily MFS-1	58	72	0.00242445	0.805556
SP_PIR_KEYWORDS	retinitis pigmentosa	29	36	0.0437728	0.805556
GOTERM_BP_ALL	GO:0009888~tissue development	261	324	1.48404e-18	0.805556
GOTERM_BP_ALL	GO:0002684~positive regulation of immune system process	62	77	0.000662557	0.805195
GOTERM_BP_ALL	GO:0050778~positive regulation of immune response	62	77	0.000662557	0.805195
UP_SEQ_FEATURE	repeat:LRR 7	62	77	0.00767651	0.805195
GOTERM_BP_ALL	GO:0019932~second-messenger-mediated signaling	194	241	2.17604e-13	0.804979
KEGG_PATHWAY	hsa05217:Basal cell carcinoma	41	51	0.00950957	0.803922
GOTERM_BP_ALL	GO:0007200~G-protein signaling, coupled to IP3 second messenger (phospholipase C activating)	61	76	0.000903528	0.802632
GOTERM_BP_ALL	GO:0006955~immune response	466	581	2.06266e-33	0.802065
SP_PIR_KEYWORDS	ion transport	376	469	9.15985e-28	0.801706
GOTERM_MF_ALL	GO:0004252~serine-type endopeptidase activity	121	151	4.39504e-08	0.801325
GOTERM_BP_ALL	GO:0009611~response to wounding	322	402	2.23734e-22	0.800995
GOTERM_BP_ALL	GO:0042060~wound healing	92	115	8.47296e-06	0.8
UP_SEQ_FEATURE	repeat:LRR 6	72	90	0.0025939	0.8
SP_PIR_KEYWORDS	pyrrolidone carboxylic acid	48	60	0.00238827	0.8
SP_PIR_KEYWORDS	synapse	124	155	1.03005e-08	0.8
GOTERM_MF_ALL	GO:0008509~anion transmembrane transporter activity	88	110	1.00948e-05	0.8
GOTERM_BP_ALL	GO:0009605~response to external stimulus	478	598	1.33853e-33	0.799331
INTERPRO	IPR013032:EGF-like region	203	254	3.72036e-13	0.799213
GOTERM_MF_ALL	GO:0042277~peptide binding	130	163	1.85785e-08	0.797546
GOTERM_MF_ALL	GO:0008081~phosphoric diester hydrolase activity	63	79	0.000691567	0.797468
KEGG_PATHWAY	hsa00980:Metabolism of xenobiotics by cytochrome P450	47	59	0.00519314	0.79661
GOTERM_BP_ALL	GO:0055066~di-, tri-valent inorganic cation homeostasis	117	147	2.82941e-07	0.795918
GOTERM_BP_ALL	GO:0030005~cellular di-, tri-valent inorganic cation homeostasis	117	147	2.82941e-07	0.795918
GOTERM_BP_ALL	GO:0030001~metal ion transport	319	401	3.07056e-21	0.795511
GOTERM_CC_ALL	GO:0044420~extracellular matrix part	81	102	5.72335e-05	0.794118
GOTERM_BP_ALL	GO:0006936~muscle contraction	123	155	1.56936e-07	0.793548
GOTERM_BP_ALL	GO:0003012~muscle system process	123	155	1.56936e-07	0.793548
GOTERM_BP_ALL	GO:0007398~ectoderm development	118	149	3.94886e-07	0.791946
INTERPRO	IPR006025:Peptidase M, neutral zinc metallopeptidases, zinc-binding site	72	91	0.000803047	0.791209
GOTERM_MF_ALL	GO:0008201~heparin binding	60	76	0.00183116	0.789474
KEGG_PATHWAY	hsa04020:Calcium signaling pathway	131	166	2.42218e-08	0.789157
GOTERM_MF_ALL	GO:0060089~molecular transducer activity	1642	2081	2.7501e-123	0.789044
GOTERM_MF_ALL	GO:0004871~signal transducer activity	1642	2081	2.7501e-123	0.789044
GOTERM_BP_ALL	GO:0051239~regulation of multicellular organismal process	213	270	4.69624e-13	0.788889
INTERPRO	IPR013320:Concanavalin A-like lectin/glucanase, subgroup	52	66	0.015341	0.787879
UP_SEQ_FEATURE	compositionally biased region:Cys-rich	78	99	0.00269478	0.787879
INTERPRO	IPR008266:Tyrosine protein kinase, active site	66	84	0.00253479	0.785714
GOTERM_BP_ALL	GO:0048771~tissue remodeling	87	111	8.42875e-05	0.783784
SP_PIR_KEYWORDS	Developmental protein	448	572	6.32099e-29	0.783217
SMART	SM00369:LRR_TYP	90	115	0.000538764	0.782609
INTERPRO	IPR003591:Leucine-rich repeat, typical subtype	90	115	0.000137467	0.782609
GOTERM_BP_ALL	GO:0001505~regulation of neurotransmitter levels	61	78	0.00302295	0.782051
KEGG_PATHWAY	hsa04340:Hedgehog signaling pathway	43	55	0.0174441	0.781818
GOTERM_BP_ALL	GO:0032943~mononuclear cell proliferation	50	64	0.0128852	0.78125
GOTERM_BP_ALL	GO:0046651~lymphocyte proliferation	50	64	0.0128852	0.78125
GOTERM_BP_ALL	GO:0051707~response to other organism	146	187	3.66094e-08	0.780749
GOTERM_CC_ALL	GO:0045177~apical part of cell	71	91	0.000707552	0.78022
GOTERM_CC_ALL	GO:0045202~synapse	159	204	4.44767e-09	0.779412
SP_PIR_KEYWORDS	spermatogenesis	53	68	0.00315999	0.779412
GOTERM_BP_ALL	GO:0030003~cellular cation homeostasis	130	167	4.28787e-07	0.778443
GOTERM_BP_ALL	GO:0055080~cation homeostasis	130	167	4.28787e-07	0.778443
GOTERM_BP_ALL	GO:0042035~regulation of cytokine biosynthetic process	49	63	0.0167944	0.777778
GOTERM_BP_ALL	GO:0007611~learning and/or memory	42	54	0.0408578	0.777778
UP_SEQ_FEATURE	repeat:LRR 5	77	99	0.00661897	0.777778
GOTERM_BP_ALL	GO:0019226~transmission of nerve impulse	252	324	3.0087e-14	0.777778
INTERPRO	IPR000152:Aspartic acid and asparagine hydroxylation site	70	90	0.00255799	0.777778
SP_PIR_KEYWORDS	Zymogen	143	184	1.60417e-08	0.777174
GOTERM_CC_ALL	GO:0005886~plasma membrane	2204	2839	3.54764e-158	0.77633
GOTERM_MF_ALL	GO:0005342~organic acid transmembrane transporter activity	52	67	0.0118074	0.776119
GOTERM_MF_ALL	GO:0046943~carboxylic acid transmembrane transporter activity	51	66	0.0161239	0.772727
GOTERM_BP_ALL	GO:0046849~bone remodeling	78	101	0.00070898	0.772277
GOTERM_CC_ALL	GO:0044459~plasma membrane part	1292	1673	2.97169e-81	0.772265
GOTERM_BP_ALL	GO:0051704~multi-organism process	225	292	7.0659e-12	0.770548
GOTERM_BP_ALL	GO:0002253~activation of immune response	47	61	0.0291036	0.770492
GOTERM_BP_ALL	GO:0006811~ion transport	560	727	1.80051e-31	0.770289
GOTERM_MF_ALL	GO:0004222~metalloendopeptidase activity	77	100	0.000698069	0.77
GOTERM_BP_ALL	GO:0001501~skeletal development	167	217	1.45854e-08	0.769585
GOTERM_CC_ALL	GO:0043235~receptor complex	60	78	0.00630061	0.769231
GOTERM_BP_ALL	GO:0002682~regulation of immune system process	70	91	0.00222831	0.769231
GOTERM_BP_ALL	GO:0007155~cell adhesion	535	696	1.5086e-29	0.768678
GOTERM_BP_ALL	GO:0022610~biological adhesion	535	696	1.5086e-29	0.768678
SP_PIR_KEYWORDS	calcium	515	670	1.07445e-29	0.768657
SP_PIR_KEYWORDS	tandem repeat	53	69	0.00577763	0.768116
GOTERM_BP_ALL	GO:0042107~cytokine metabolic process	56	73	0.0124436	0.767123
GOTERM_BP_ALL	GO:0050776~regulation of immune response	69	90	0.00289612	0.766667
GOTERM_MF_ALL	GO:0016298~lipase activity	69	90	0.002377	0.766667
GOTERM_MF_ALL	GO:0017171~serine hydrolase activity	130	170	1.60703e-06	0.764706
GOTERM_CC_ALL	GO:0009986~cell surface	120	157	6.59068e-06	0.764331
GOTERM_BP_ALL	GO:0015674~di-, tri-valent inorganic cation transport	107	140	4.46849e-05	0.764286
GOTERM_BP_ALL	GO:0042089~cytokine biosynthetic process	55	72	0.0158653	0.763889
GOTERM_BP_ALL	GO:0001503~ossification	71	93	0.00284301	0.763441
GOTERM_BP_ALL	GO:0031214~biomineral formation	71	93	0.00284301	0.763441
GOTERM_MF_ALL	GO:0008236~serine-type peptidase activity	129	169	2.1045e-06	0.763314
GOTERM_BP_ALL	GO:0001816~cytokine production	87	114	0.000513761	0.763158
SP_PIR_KEYWORDS	microsome	74	97	0.000628245	0.762887
GOTERM_MF_ALL	GO:0015293~symporter activity	112	147	1.9713e-05	0.761905
UP_SEQ_FEATURE	propeptide:Removed in mature form	115	151	0.000374851	0.761589
UP_SEQ_FEATURE	transmembrane region	2225	2925	3.94271e-142	0.760684
GOTERM_BP_ALL	GO:0009891~positive regulation of biosynthetic process	54	71	0.0204938	0.760563
GOTERM_BP_ALL	GO:0050801~ion homeostasis	165	217	8.83779e-08	0.760369
KEGG_PATHWAY	hsa04512:ECM-receptor interaction	63	83	0.00482003	0.759036
GOTERM_BP_ALL	GO:0031328~positive regulation of cellular biosynthetic process	47	62	0.0483623	0.758065
GOTERM_BP_ALL	GO:0006873~cellular ion homeostasis	150	198	7.06554e-07	0.757576
GOTERM_BP_ALL	GO:0055082~cellular chemical homeostasis	150	198	7.06554e-07	0.757576
GOTERM_BP_ALL	GO:0032501~multicellular organismal process	2572	3397	2.82972e-166	0.757139
GOTERM_MF_ALL	GO:0005102~receptor binding	520	688	5.35486e-26	0.755814
SMART	SM00179:EGF_CA	68	90	0.0212929	0.755556
SP_PIR_KEYWORDS	neurogenesis	68	90	0.00201593	0.755556
GOTERM_BP_ALL	GO:0048609~reproductive process in a multicellular organism	52	69	0.0347695	0.753623
GOTERM_BP_ALL	GO:0032504~multicellular organism reproduction	52	69	0.0347695	0.753623
GOTERM_MF_ALL	GO:0004620~phospholipase activity	55	73	0.0254115	0.753425
GOTERM_BP_ALL	GO:0048878~chemical homeostasis	191	254	2.05567e-08	0.751969
UP_SEQ_FEATURE	repeat:LRR 1	97	129	0.0058345	0.751938
UP_SEQ_FEATURE	repeat:LRR 2	97	129	0.0058345	0.751938
SMART	SM00219:TyrKc	87	116	0.00671659	0.75
INTERPRO	IPR001881:EGF-like calcium-binding	66	88	0.0214682	0.75
INTERPRO	IPR001245:Tyrosine protein kinase	87	116	0.00265324	0.75
UP_SEQ_FEATURE	metal ion-binding site:Zinc (catalytic)	75	100	0.0463206	0.75
GOTERM_BP_ALL	GO:0007409~axonogenesis	95	127	0.000735298	0.748031
GOTERM_BP_ALL	GO:0002252~immune effector process	80	107	0.00312642	0.747664
GOTERM_BP_ALL	GO:0007601~visual perception	153	205	2.65392e-06	0.746341
GOTERM_BP_ALL	GO:0050953~sensory perception of light stimulus	153	205	2.65392e-06	0.746341
GOTERM_BP_ALL	GO:0048598~embryonic morphogenesis	85	114	0.00228782	0.745614
SP_PIR_KEYWORDS	cell junction	205	275	2.56972e-09	0.745455
UP_SEQ_FEATURE	repeat:LRR 4	82	110	0.0322133	0.745455
UP_SEQ_FEATURE	repeat:LRR 3	90	121	0.0199606	0.743802
SP_PIR_KEYWORDS	leucine-rich repeat	168	226	1.59416e-07	0.743363
GOTERM_BP_ALL	GO:0002250~adaptive immune response	55	74	0.0407198	0.743243
GOTERM_BP_ALL	GO:0002460~adaptive immune response based on somatic recombination of immune receptors built from immunoglobulin superfamily domains	55	74	0.0407198	0.743243
GOTERM_BP_ALL	GO:0002376~immune system process	577	777	3.64562e-25	0.7426
INTERPRO	IPR001611:Leucine-rich repeat	164	222	6.08574e-06	0.738739
GOTERM_BP_ALL	GO:0007417~central nervous system development	175	237	1.01484e-06	0.738397
GOTERM_MF_ALL	GO:0015291~secondary active transmembrane transporter activity	146	198	1.03102e-05	0.737374
GOTERM_MF_ALL	GO:0005509~calcium ion binding	635	862	9.12841e-27	0.736659
GOTERM_BP_ALL	GO:0022414~reproductive process	204	277	9.99757e-08	0.736462
GOTERM_BP_ALL	GO:0015672~monovalent inorganic cation transport	223	303	1.88946e-08	0.735974
GOTERM_BP_ALL	GO:0007420~brain development	108	147	0.000707328	0.734694
GOTERM_BP_ALL	GO:0035295~tube development	104	142	0.00123118	0.732394
GOTERM_BP_ALL	GO:0006812~cation transport	354	484	3.76366e-13	0.731405
SP_PIR_KEYWORDS	differentiation	215	294	1.47503e-08	0.731293
GOTERM_BP_ALL	GO:0035239~tube morphogenesis	76	104	0.0129484	0.730769
SP_PIR_KEYWORDS	transmembrane	2721	3725	1.26281e-139	0.73047
GOTERM_MF_ALL	GO:0015075~ion transmembrane transporter activity	476	652	1.95108e-18	0.730061
GOTERM_BP_ALL	GO:0000904~cellular morphogenesis during differentiation	105	144	0.00142823	0.729167
GOTERM_BP_ALL	GO:0042110~T cell activation	78	107	0.012444	0.728972
GOTERM_BP_ALL	GO:0001775~cell activation	163	224	1.47825e-05	0.727679
GOTERM_BP_ALL	GO:0048812~neurite morphogenesis	98	135	0.00314327	0.725926
GOTERM_BP_ALL	GO:0048667~neuron morphogenesis during differentiation	98	135	0.00314327	0.725926
GOTERM_CC_ALL	GO:0030054~cell junction	262	361	3.31987e-09	0.725762
GOTERM_BP_ALL	GO:0045321~leukocyte activation	143	198	0.000145371	0.722222
GOTERM_BP_ALL	GO:0007283~spermatogenesis	145	201	0.000139211	0.721393
GOTERM_BP_ALL	GO:0048232~male gamete generation	145	201	0.000139211	0.721393
GOTERM_BP_ALL	GO:0048015~phosphoinositide-mediated signaling	75	104	0.0238338	0.721154
SP_PIR_KEYWORDS	metalloprotease	91	127	0.00318134	0.716535
GOTERM_BP_ALL	GO:0050896~response to stimulus	1749	2441	2.00887e-67	0.71651
SP_PIR_KEYWORDS	signal-anchor	250	349	1.56552e-08	0.716332
COG_ONTOLOGY	Signal transduction mechanisms / Cytoskeleton / Cell division and chromosome partitioning / General function prediction only	45	63	0.00527937	0.714286
GOTERM_BP_ALL	GO:0031175~neurite development	109	153	0.0041081	0.712418
GOTERM_MF_ALL	GO:0008324~cation transmembrane transporter activity	354	497	6.34313e-11	0.712274
SP_PIR_KEYWORDS	metalloprotein	84	118	0.00740222	0.711864
GOTERM_BP_ALL	GO:0016477~cell migration	175	246	5.63148e-05	0.711382
GOTERM_BP_ALL	GO:0046649~lymphocyte activation	122	172	0.00236292	0.709302
SP_PIR_KEYWORDS	structural protein	80	113	0.0127049	0.707965
GOTERM_BP_ALL	GO:0000003~reproduction	349	493	6.81369e-10	0.707911
SP_PIR_KEYWORDS	lipoprotein	393	556	4.6525e-12	0.706835
GOTERM_MF_ALL	GO:0022857~transmembrane transporter activity	595	842	5.26122e-18	0.706651
GOTERM_MF_ALL	GO:0016705~oxidoreductase activity, acting on paired donors, with incorporation or reduction of molecular oxygen	79	112	0.0432999	0.705357
GOTERM_BP_ALL	GO:0007389~pattern specification process	100	142	0.0132862	0.704225
SMART	SM00349:KRAB	202	287	0.00085724	0.703833
GOTERM_BP_ALL	GO:0048513~organ development	846	1202	7.68434e-25	0.703827
GOTERM_BP_ALL	GO:0048731~system development	1151	1638	1.3112e-34	0.702686
GOTERM_MF_ALL	GO:0022891~substrate-specific transmembrane transporter activity	529	754	1.11022e-14	0.701592
GOTERM_MF_ALL	GO:0043565~sequence-specific DNA binding	322	459	1.18865e-08	0.701525
GOTERM_CC_ALL	GO:0031224~intrinsic to membrane	3121	4449	2.00466e-122	0.701506
GOTERM_CC_ALL	GO:0016021~integral to membrane	3107	4430	1.12791e-121	0.701354
GOTERM_BP_ALL	GO:0007399~nervous system development	500	713	2.52354e-13	0.701262
INTERPRO	IPR001909:KRAB box	193	276	0.000192695	0.699275
GOTERM_BP_ALL	GO:0009887~organ morphogenesis	267	382	1.17682e-06	0.698953
GOTERM_BP_ALL	GO:0048666~neuron development	123	176	0.00528985	0.698864
GOTERM_BP_ALL	GO:0048646~anatomical structure formation	115	165	0.00994069	0.69697
SP_PIR_KEYWORDS	tyrosine-protein kinase	69	99	0.0465985	0.69697
GOTERM_BP_ALL	GO:0007275~multicellular organismal development	1501	2157	2.43844e-43	0.695874
GOTERM_BP_ALL	GO:0019953~sexual reproduction	208	299	6.8298e-05	0.695652
GOTERM_BP_ALL	GO:0048514~blood vessel morphogenesis	107	154	0.0169719	0.694805
GOTERM_CC_ALL	GO:0005911~intercellular junction	97	140	0.0325663	0.692857
GOTERM_BP_ALL	GO:0030182~neuron differentiation	160	231	0.00135349	0.692641
GOTERM_BP_ALL	GO:0001525~angiogenesis	92	133	0.0451957	0.691729
SP_PIR_KEYWORDS	duplication	142	206	0.00127389	0.68932
GOTERM_MF_ALL	GO:0035091~phosphoinositide binding	123	180	0.0165509	0.683333
GOTERM_BP_ALL	GO:0048699~generation of neurons	181	265	0.00142584	0.683019
INTERPRO	IPR007086:Zinc finger, C2H2-subtype	187	274	0.0022829	0.682482
GOTERM_BP_ALL	GO:0007154~cell communication	2452	3599	7.71416e-67	0.6813
SP_PIR_KEYWORDS	membrane	3171	4661	7.77186e-96	0.680326
KEGG_PATHWAY	hsa04630:Jak-STAT signaling pathway	101	149	0.0387006	0.677852
GOTERM_BP_ALL	GO:0048856~anatomical structure development	1351	1995	2.52637e-29	0.677193
GOTERM_MF_ALL	GO:0004175~endopeptidase activity	245	362	0.00012091	0.676796
GOTERM_MF_ALL	GO:0004857~enzyme inhibitor activity	159	235	0.0056651	0.676596
GOTERM_BP_ALL	GO:0007165~signal transduction	2200	3262	7.91771e-52	0.674433
GOTERM_BP_ALL	GO:0032990~cell part morphogenesis	145	215	0.0148736	0.674419
GOTERM_BP_ALL	GO:0048858~cell projection morphogenesis	145	215	0.0148736	0.674419
GOTERM_BP_ALL	GO:0030030~cell projection organization and biogenesis	145	215	0.0148736	0.674419
GOTERM_BP_ALL	GO:0001568~blood vessel development	118	175	0.0428998	0.674286
GOTERM_BP_ALL	GO:0001944~vasculature development	120	178	0.0409802	0.674157
GOTERM_BP_ALL	GO:0007276~gamete generation	170	253	0.00728003	0.671937
GOTERM_CC_ALL	GO:0044425~membrane part	3375	5035	4.14637e-90	0.670308
GOTERM_BP_ALL	GO:0022008~neurogenesis	193	288	0.00363888	0.670139
GOTERM_BP_ALL	GO:0009607~response to biotic stimulus	178	268	0.0119356	0.664179
GOTERM_BP_ALL	GO:0006928~cell motility	256	387	0.00132632	0.661499
GOTERM_BP_ALL	GO:0051674~localization of cell	256	387	0.00132632	0.661499
GOTERM_BP_ALL	GO:0009653~anatomical structure morphogenesis	693	1049	3.47569e-10	0.660629
GOTERM_BP_ALL	GO:0042592~homeostatic process	248	377	0.00272168	0.657825
GOTERM_MF_ALL	GO:0005215~transporter activity	782	1189	1.81909e-11	0.657696
GOTERM_MF_ALL	GO:0005543~phospholipid binding	151	230	0.0489814	0.656522
GOTERM_CC_ALL	GO:0042995~cell projection	206	314	0.00984001	0.656051
GOTERM_MF_ALL	GO:0022892~substrate-specific transporter activity	614	939	3.22441e-08	0.653887
GOTERM_BP_ALL	GO:0009790~embryonic development	177	272	0.0410008	0.650735
GOTERM_BP_ALL	GO:0042221~response to chemical stimulus	354	546	0.000653638	0.648352
GOTERM_MF_ALL	GO:0008289~lipid binding	262	408	0.0111628	0.642157
GOTERM_CC_ALL	GO:0005624~membrane fraction	442	689	0.000193587	0.641509
GOTERM_CC_ALL	GO:0016020~membrane	3831	5972	3.30333e-66	0.641494
GOTERM_CC_ALL	GO:0000267~cell fraction	574	905	6.38291e-05	0.634254
GOTERM_BP_ALL	GO:0032502~developmental process	1897	2992	2.14697e-19	0.634024
COG_ONTOLOGY	Inorganic ion transport and metabolism	57	90	0.0334823	0.633333
UP_SEQ_FEATURE	sequence variant	3028	4835	3.30025e-29	0.626267
GOTERM_MF_ALL	GO:0003700~transcription factor activity	523	844	0.00389397	0.619668
GOTERM_BP_ALL	GO:0065008~regulation of biological quality	491	804	0.0405217	0.610697
GOTERM_BP_ALL	GO:0048869~cellular developmental process	1032	1698	0.00050993	0.607774
GOTERM_BP_ALL	GO:0030154~cell differentiation	1032	1698	0.00050993	0.607774
SP_PIR_KEYWORDS	disease mutation	769	1274	0.00270834	0.603611
SP_PIR_KEYWORDS	dna-binding	893	1504	0.0125941	0.59375
COG_ONTOLOGY	General function prediction only	405	793	0.0431041	0.510719
