# Supplementary material for: An Abundance of Ubiquitously Expressed Genes Revealed by Tissue Transcriptome Sequence Data
Source: PLoS Comput Biol. 2009 Dec 11;5(12):e1000598. doi: 10.1371/journal.pcbi.1000598 (PMC2781110; doi:10.1371/journal.pcbi.1000598)
Supplement: Dataset S4 — Functional Relative Allocation of Transcripts (0.17 MB XLS) [file pcbi.1000598.s011.xls]

## Sheet: STableX
Dataset S4. Functional Relative Allocation of Transcripts. This supplemental table contains both the map between GeneOntology categories and FRACT categories and the original fraction of transcriptome mapped to each Gene Ontology category for each mRNA-SEQ sample. Categories are sorted according to sum of transcriptome fractions across all samples.
			Fraction of Transcriptome Allocated to each Original Gene Ontology Category
GOID	Gene Ontology Category Name	FRACT Category	breast	MCF7	BT474	HME	MB435	T47D	adipose	brain	colon	heart	liver	lymphnode	skel muscle	testes		SUM
GO:0006412	translation	translation	0.0694187	0.130371	0.0880027	0.0986043	0.0868845	0.0867663	0.085781	0.0405455	0.117121	0.0434909	0.0317922	0.0971617	0.0832895	0.0805243		1.13975
GO:0006355	regulation of transcription, DNA-dependent	macromolecular turnover	0.0175006	0.0218933	0.025645	0.0148861	0.0205768	0.0211584	0.0179209	0.0178756	0.0194129	0.014691	0.00604852	0.0152712	0.0231872	0.0233781		0.259446
GO:0007165	signal transduction	signal transduction	0.0152538	0.0118066	0.0137827	0.02668	0.0138137	0.0132321	0.0192543	0.0176954	0.0221722	0.0162552	0.0236341	0.0142454	0.0164282	0.0171692		0.241423
GO:0006810	transport	transport	0.0129044	0.0128196	0.0141405	0.011126	0.0142692	0.0175792	0.0157927	0.0164476	0.0129868	0.0257798	0.0298323	0.0101973	0.0112232	0.013354		0.218453
GO:0006953	acute-phase response	acute-phase response	0.0010305	0.000104227	9.3838e-05	0.000834493	0.000282795	0.000759995	0.000488281	0.000602842	0.000290707	0.000244722	0.210749	0.000566293	0.000198935	0.000433238		0.21668
GO:0008150	biological_process	removed	0.0172381	0.0143735	0.0149233	0.0211512	0.0150212	0.0164808	0.0155619	0.0159881	0.0141554	0.0167657	0.00682736	0.0103955	0.0144203	0.0183176		0.21162
GO:0006118	electron transport	electron transport	0.0144833	0.0143116	0.0130096	0.00895019	0.0116629	0.0127593	0.0103703	0.0122936	0.0113445	0.0381821	0.0200907	0.00870873	0.0213351	0.0114569		0.208959
GO:0006350	transcription	macromolecular turnover	0.0136994	0.016885	0.0195024	0.0121362	0.0180329	0.0162491	0.0131378	0.0132858	0.0127062	0.00836679	0.00421737	0.0110529	0.0150094	0.0172068		0.191488
GO:0006508	proteolysis	other	0.015263	0.0105889	0.00739492	0.0129688	0.0108015	0.0169258	0.0169646	0.00843754	0.0116063	0.00816212	0.0187845	0.0107644	0.0101848	0.0122552		0.171102
GO:0008152	metabolic process	metabolic process	0.0139004	0.014979	0.0138201	0.01179	0.0129478	0.0138421	0.011679	0.0130536	0.00892422	0.0111141	0.012378	0.00817945	0.011194	0.0111982		0.169
GO:0007010	cytoskeleton organization and biogenesis	cytoskeleton	0.00846449	0.0140862	0.0121161	0.0191144	0.00714097	0.00657628	0.0122176	0.00594584	0.0148922	0.00931326	0.00204899	0.0115753	0.00881311	0.00651027		0.138815
GO:0007155	cell adhesion	cytoskeleton	0.0113197	0.00609967	0.00657004	0.02294	0.00826763	0.0077506	0.0124975	0.0105805	0.0119547	0.00623559	0.010243	0.00725725	0.00665809	0.00872989		0.137104
GO:0006457	protein folding	macromolecular turnover	0.00658595	0.00843267	0.00894702	0.00630979	0.0113604	0.0106571	0.0064724	0.00826928	0.00807491	0.00763826	0.0065415	0.00786651	0.00702087	0.00890534		0.113082
GO:0015031	protein transport	transport	0.00699951	0.00962293	0.00980483	0.00681427	0.0100683	0.0110015	0.00743811	0.0105976	0.00637632	0.00649286	0.00453495	0.0061049	0.00645192	0.00840859		0.110717
GO:0007186	G-protein coupled receptor protein signaling pathway	G-protein coupled receptor protein signaling pathway	0.00793809	0.00799559	0.00760426	0.00639362	0.00720667	0.00860807	0.00937903	0.0161933	0.00803228	0.00455818	0.00312753	0.00686189	0.00582878	0.00852113		0.108248
GO:0007275	multicellular organismal development	development	0.00848292	0.00726406	0.00734844	0.00591138	0.00941333	0.00724798	0.00915503	0.00997326	0.00809268	0.00565199	0.00346152	0.0072678	0.00542165	0.011277		0.105969
GO:0006955	immune response	immune response	0.00794434	0.00570686	0.00403356	0.00399024	0.00781975	0.00397463	0.0120468	0.00807738	0.0076698	0.00440131	0.00713234	0.0198712	0.00280668	0.00570223		0.101177
GO:0006468	protein amino acid phosphorylation	signal transduction	0.00721997	0.00704561	0.00703795	0.00576491	0.00694665	0.00621133	0.00812946	0.00955952	0.00617436	0.00705123	0.00180141	0.00589086	0.00910354	0.00846088		0.0963977
GO:0006120	mitochondrial electron transport, NADH to ubiquinone	electron transport	0.0063018	0.00652857	0.0073318	0.00423782	0.00596465	0.00640993	0.00404744	0.00751069	0.00561404	0.0158579	0.00454346	0.0035827	0.00952997	0.00664666		0.0941074
GO:0008380	RNA splicing	macromolecular turnover	0.00435476	0.00947731	0.0116348	0.00555372	0.00948341	0.00993963	0.00465777	0.0057298	0.00479715	0.00447543	0.00243019	0.00583776	0.00413643	0.00646524		0.0889734
GO:0006928	cell motility	cytoskeleton	0.00651541	0.00798274	0.0062686	0.00831552	0.00801131	0.00700127	0.00934893	0.00462227	0.00898517	0.00392066	0.00139346	0.00532953	0.00276057	0.00545556		0.085911
GO:0006886	intracellular protein transport	transport	0.00497624	0.00714012	0.00748402	0.00477964	0.00747741	0.00759567	0.00545058	0.00723248	0.00527098	0.00416823	0.00299025	0.00553383	0.00403547	0.00583774		0.0799727
GO:0006629	lipid metabolic process	metabolic process	0.0105113	0.00301888	0.00480589	0.00301775	0.00325505	0.00379095	0.0099118	0.0067407	0.00441469	0.00454034	0.0111101	0.00402409	0.00423569	0.00645175		0.079829
GO:0006512	ubiquitin cycle	macromolecular turnover	0.00458614	0.00639031	0.00698915	0.0043815	0.0067486	0.00642493	0.00459981	0.00741765	0.00468628	0.00521145	0.00198711	0.00412322	0.00779342	0.00764154		0.0789811
GO:0006096	glycolysis	glycolysis	0.00880534	0.0037952	0.00426516	0.00582257	0.00682071	0.00362653	0.00273323	0.00613157	0.00281997	0.00835622	0.00152185	0.00215074	0.0165907	0.00365692		0.0770967
GO:0006954	inflammatory response	inflammatory response	0.00284248	0.00163359	0.00186277	0.00281836	0.00225429	0.00217113	0.00391097	0.00115212	0.00267509	0.00132647	0.0428503	0.00372953	0.00121127	0.00193		0.0723684
GO:0006915	apoptosis	regulation of cell proliferation	0.00457053	0.00578214	0.00554222	0.00495421	0.00539248	0.00531455	0.00493549	0.00668156	0.00474842	0.00788085	0.00297185	0.00458921	0.00332381	0.00538678		0.0720741
GO:0006916	anti-apoptosis	regulation of cell proliferation	0.00393445	0.00708397	0.00564728	0.00558168	0.00521161	0.00549387	0.003499	0.00609036	0.00444045	0.00484144	0.0020406	0.00366503	0.0104917	0.00360348		0.0716249
GO:0006936	muscle contraction	muscle contraction	0.00714584	0.000376005	0.000561442	0.000540519	0.000669274	0.000512903	0.000986567	0.00129806	0.00547033	0.0296762	0.000506868	0.000928112	0.0202353	0.00214325		0.0710507
GO:0030154	cell differentiation	regulation of cell proliferation	0.00452616	0.00859834	0.00452495	0.00573077	0.00835379	0.00536522	0.00446416	0.00574678	0.00490732	0.00274277	0.00257191	0.00442302	0.00391995	0.00448546		0.0703606
GO:0006811	ion transport	transport	0.00399462	0.0045173	0.00523244	0.0049914	0.0044559	0.00533895	0.00386951	0.00855801	0.00506382	0.00730834	0.00350936	0.00331315	0.0047276	0.00436867		0.0692491
GO:0007242	intracellular signaling cascade	signal transduction	0.00469696	0.0043419	0.00507733	0.00402605	0.00399123	0.00429162	0.00485715	0.00699989	0.00619835	0.00376654	0.0013944	0.0049878	0.00779652	0.00516928		0.067595
GO:0006464	protein modification process	signal transduction	0.00421721	0.00538148	0.00534884	0.00418617	0.00621897	0.00520503	0.00435317	0.00490577	0.00472988	0.00361984	0.00167693	0.00410644	0.0055681	0.00555561		0.0650734
GO:0007049	cell cycle	regulation of cell proliferation	0.00425439	0.00527491	0.00545654	0.00422881	0.00585574	0.00618301	0.00440212	0.00850115	0.00389435	0.00266856	0.0011994	0.00352666	0.00331896	0.00572549		0.0644901
GO:0008283	cell proliferation	regulation of cell proliferation	0.00553871	0.00401329	0.00619324	0.00388657	0.00470779	0.0060384	0.00623813	0.00476723	0.00484305	0.00246979	0.0021309	0.00450649	0.00304567	0.00464705		0.0630263
GO:0006397	mRNA processing	macromolecular turnover	0.00327649	0.00694699	0.00781397	0.00407777	0.00647778	0.00674506	0.00328857	0.00389655	0.00302501	0.00295457	0.00150388	0.00369394	0.00320514	0.00459101		0.0614967
GO:0006414	translational elongation	translation	0.00331692	0.00668328	0.00425365	0.00344825	0.00471384	0.00539724	0.00444799	0.00273536	0.0041074	0.00331847	0.00114719	0.00412668	0.00937012	0.00295482		0.0600212
GO:0007605	sensory perception of sound	other	0.00516323	0.00505388	0.00405584	0.00435717	0.00501573	0.00507011	0.00702239	0.00352012	0.00580236	0.0019709	0.00127914	0.00310143	0.00202638	0.0040911		0.0575298
GO:0006937	regulation of muscle contraction	muscle contraction	0.00347042	0.000311893	0.00012157	0.000346915	0.000775218	0.000864343	0.00190458	0.00025744	0.0103509	0.0197869	7.89156e-05	0.0017135	0.0100561	0.00456114		0.0545998
GO:0008544	epidermis development	epidermis development	0.00195718	0.000289281	0.00044943	0.0478862	0.000391134	0.000477843	0.000322901	0.000217439	0.00031478	0.000461851	0.000136807	0.000252075	0.000221409	0.00040276		0.0537811
GO:0006334	nucleosome assembly	macromolecular turnover	0.0026382	0.00511909	0.0125229	0.00290421	0.00347728	0.004508	0.00295762	0.00494107	0.00292357	0.00184059	0.00104482	0.00268707	0.00209351	0.00332181		0.0529797
GO:0007507	heart development	heart development	0.00130182	0.000546417	0.000696153	0.00048072	0.000550042	0.000536565	0.000678463	0.000582049	0.000682155	0.0385209	0.000175037	0.000603503	0.00627603	0.00129692		0.0529268
GO:0006511	ubiquitin-dependent protein catabolic process	metabolic process	0.00282946	0.00463714	0.00709318	0.00300868	0.00465367	0.00454223	0.00308412	0.00411413	0.00248414	0.00316523	0.00206097	0.00234396	0.00433644	0.00392956		0.0522829
GO:0008284	positive regulation of cell proliferation	regulation of cell proliferation	0.00327264	0.00257828	0.00231418	0.00291821	0.00329645	0.00236522	0.00405331	0.00254877	0.00369408	0.00215239	0.0108252	0.00360823	0.0015999	0.00476394		0.0499908
GO:0005975	carbohydrate metabolic process	metabolic process	0.00518272	0.00358249	0.0035414	0.00267982	0.00331254	0.00341169	0.00502959	0.00272227	0.00295389	0.00365014	0.00260145	0.00235037	0.00536667	0.00281228		0.0491973
GO:0016192	vesicle-mediated transport	transport	0.003026	0.003647	0.00363425	0.003166	0.00424457	0.00444693	0.00275896	0.00553776	0.00228714	0.00513235	0.00110711	0.00224226	0.00302715	0.0030514		0.0473089
GO:0008016	regulation of heart contraction	muscle contraction	0.00057023	0.000166803	0.00017807	0.000123008	0.000103528	0.000123369	0.000275263	0.000313191	0.00411133	0.032811	4.8532e-05	0.000340516	0.00624193	0.000790019		0.0461968
GO:0006979	response to oxidative stress	other	0.00306496	0.00287359	0.0033267	0.00275908	0.00222216	0.00313382	0.0032951	0.00338447	0.00278707	0.00323689	0.00283371	0.00236989	0.00743451	0.00289274		0.0456147
GO:0042981	regulation of apoptosis	regulation of cell proliferation	0.00653445	0.0021523	0.0018272	0.00361345	0.00498905	0.00276	0.00414826	0.00271991	0.00397163	0.00208845	0.00172487	0.00279097	0.00330059	0.00285682		0.0454779
GO:0000074	regulation of progression through cell cycle	regulation of cell proliferation	0.00298213	0.00409587	0.00499794	0.00276976	0.00428524	0.0040121	0.0032018	0.00326735	0.00314283	0.00209843	0.00150337	0.00267365	0.00224424	0.00399741		0.0452721
GO:0007264	small GTPase mediated signal transduction	signal transduction	0.00261524	0.00286247	0.00342569	0.00308146	0.00382263	0.00375078	0.00341164	0.00518941	0.00280131	0.00328984	0.00127846	0.00298572	0.00212758	0.00303415		0.0436764
GO:0045449	regulation of transcription	macromolecular turnover	0.00331886	0.00377039	0.00349005	0.00258094	0.0034615	0.00323255	0.00331843	0.00291129	0.00289373	0.00227522	0.00152861	0.00282329	0.00318316	0.00363647		0.0424245
GO:0006357	regulation of transcription from RNA polymerase II promoter	macromolecular turnover	0.00257269	0.00327832	0.00358202	0.00233876	0.00402886	0.00301564	0.00277178	0.00226532	0.00239746	0.00247891	0.00113607	0.0025228	0.00598562	0.00276562		0.0411399
GO:0043123	positive regulation of I-kappaB kinase/NF-kappaB cascade	immune response	0.00602404	0.0022915	0.00209541	0.00320768	0.005059	0.00335565	0.00386159	0.00224695	0.00359499	0.00174389	0.000839044	0.00230639	0.00141095	0.00263637		0.0406735
GO:0015992	proton transport	transport	0.0025133	0.00306385	0.00286349	0.00257162	0.00245166	0.00364358	0.00176096	0.00382313	0.00260083	0.00616479	0.00205047	0.00169173	0.00256729	0.00260778		0.0403745
GO:0006952	defense response	immune response	0.00169979	0.00236084	0.00315884	0.00152862	0.00297777	0.00258162	0.0016531	0.00194283	0.0032876	0.000955698	0.0134427	0.00160865	0.000954522	0.00189195		0.0400445
GO:0006461	protein complex assembly	macromolecular turnover	0.00298876	0.00328416	0.00404583	0.00237936	0.00356156	0.0051742	0.00294278	0.00309345	0.0021154	0.00185272	0.00141348	0.00249235	0.00183636	0.0028135		0.0399939
GO:0007399	nervous system development	development	0.00279184	0.00232929	0.00299023	0.00240253	0.00343248	0.00249034	0.00249405	0.00911446	0.00276707	0.00157188	0.00063864	0.00170336	0.00190745	0.00267035		0.039304
GO:0006942	regulation of striated muscle contraction	muscle contraction	0.0015873	2.34601e-05	1.51678e-05	2.68886e-05	2.3746e-05	1.12502e-05	0.000111899	4.07416e-05	4.1782e-05	0.0276896	4.46956e-06	7.94315e-05	0.00739564	0.000560042		0.0376114
GO:0006813	potassium ion transport	transport	0.00272815	0.00229095	0.00257351	0.00199872	0.00225037	0.00251511	0.00206705	0.00322779	0.0041979	0.00384691	0.000649	0.00182974	0.00360767	0.00366916		0.037452
GO:0030036	actin cytoskeleton organization and biogenesis	cytoskeleton	0.00242811	0.00294653	0.0040864	0.00282955	0.00467728	0.00320469	0.00287296	0.00278178	0.00303123	0.00153259	0.00077175	0.00251275	0.00133749	0.00242199		0.0374351
GO:0000398	nuclear mRNA splicing, via spliceosome	macromolecular turnover	0.00152179	0.00347589	0.00489926	0.00192943	0.00403805	0.00387257	0.00179654	0.00215671	0.0019025	0.00166599	0.000880726	0.00242792	0.00190927	0.00277112		0.0352478
GO:0006091	generation of precursor metabolites and energy	metabolic process	0.00238951	0.00221104	0.00219751	0.00170725	0.00208414	0.00289305	0.00156218	0.00200901	0.0016658	0.0087591	0.00176455	0.00100343	0.00262312	0.00190758		0.0347773
GO:0015986	ATP synthesis coupled proton transport	metabolic process	0.00227314	0.00252535	0.00223802	0.00237809	0.00209731	0.00337892	0.00156729	0.00293414	0.00211619	0.00535533	0.00162974	0.00139029	0.00291699	0.00185452		0.0346553
GO:0007166	cell surface receptor linked signal transduction	signal transduction	0.00217496	0.00254694	0.00259963	0.00258426	0.00345037	0.00314054	0.00283969	0.00163673	0.00284837	0.00201615	0.00139045	0.00277659	0.00161416	0.00278431		0.0344031
GO:0016071	mRNA metabolic process	macromolecular turnover	0.00228745	0.00426448	0.00329293	0.00234309	0.00338724	0.00324408	0.00249563	0.00187854	0.00230399	0.00158653	0.000801727	0.0020903	0.00134398	0.00277799		0.034098
GO:0043066	negative regulation of apoptosis	regulation of cell proliferation	0.00135323	0.00138387	0.000996915	0.00143466	0.00208964	0.00128958	0.00232658	0.000911556	0.00192845	0.000940531	0.00965198	0.00228993	0.00466177	0.00262855		0.0338872
GO:0006446	regulation of translational initiation	translation	0.0018181	0.0032491	0.00278745	0.00318376	0.00312184	0.00288671	0.00196894	0.00159681	0.00267186	0.00185657	0.000761408	0.00200522	0.00394554	0.0019088		0.0337621
GO:0006950	response to stress	other	0.00213395	0.0021102	0.00304044	0.00141477	0.00262293	0.00243983	0.00164371	0.00316693	0.00255128	0.00291819	0.00117769	0.00183672	0.00268583	0.00251601		0.0322585
GO:0000122	negative regulation of transcription from RNA polymerase II promoter	macromolecular turnover	0.00217298	0.00224762	0.00231429	0.00205743	0.00269408	0.00217274	0.00253635	0.00185728	0.00212297	0.0011058	0.000604881	0.00168055	0.00484127	0.00254754		0.0309558
GO:0006366	transcription from RNA polymerase II promoter	macromolecular turnover	0.0021437	0.00215461	0.00266614	0.00167106	0.00315341	0.00247007	0.00223445	0.00236999	0.00199294	0.0015691	0.000773194	0.00158074	0.0020982	0.00272863		0.0296062
GO:0009887	organ morphogenesis	development	0.00259007	0.000511747	0.000545132	0.000493805	0.0007338	0.000449154	0.00290081	0.00114745	0.00474306	0.00283624	0.00485986	0.00302583	0.00128018	0.00310605		0.0292232
GO:0006897	endocytosis	transport	0.00295419	0.00185162	0.00191936	0.00204247	0.00217825	0.00212802	0.00240115	0.0027085	0.00232615	0.00164737	0.00099914	0.00145664	0.00225306	0.002017		0.0288829
GO:0016042	lipid catabolic process	metabolic process	0.00973023	0.000736646	0.000593075	0.000837552	0.000612483	0.000788492	0.00601216	0.00101502	0.000901405	0.000720274	0.00369247	0.000864004	0.00101928	0.00107036		0.0285935
GO:0007517	muscle development	development	0.00224389	0.000160529	0.000173289	0.000293649	0.000389886	0.000349008	0.00288139	0.0014529	0.00881619	0.00268295	0.000152987	0.00192141	0.00306812	0.00350322		0.0280894
GO:0001558	regulation of cell growth	regulation of cell proliferation	0.00207103	0.00108267	0.0028022	0.00191105	0.00168237	0.00207099	0.00385912	0.00153979	0.0032679	0.000931301	0.00128015	0.00197807	0.000812037	0.00274134		0.02803
GO:0006470	protein amino acid dephosphorylation	signal transduction	0.00205993	0.00220806	0.0025442	0.00163647	0.00189157	0.00232972	0.0019526	0.00259328	0.00155522	0.00238828	0.000597636	0.00140917	0.00227933	0.00257447		0.0280199
GO:0008285	negative regulation of cell proliferation	regulation of cell proliferation	0.00204898	0.00253374	0.00191458	0.0017009	0.00218972	0.00151634	0.00304467	0.00206001	0.00270941	0.00133311	0.00100662	0.00224564	0.00127224	0.00219613		0.0277721
GO:0006888	ER to Golgi vesicle-mediated transport	transport	0.00191445	0.00264778	0.00297805	0.00173539	0.00249165	0.00316516	0.00180176	0.002129	0.00145479	0.00124793	0.00131796	0.00129371	0.00138853	0.00199853		0.0275647
GO:0043542	endothelial cell migration	development	0.000134982	0.000160476	0.000187214	0.0263386	0.000174578	0.000127506	6.75244e-05	6.22934e-05	5.72287e-05	4.87655e-05	1.28334e-05	6.3319e-05	2.71273e-05	5.41609e-05		0.0275166
GO:0006364	rRNA processing	macromolecular turnover	0.00139504	0.00343565	0.00356636	0.00224712	0.00348795	0.00244569	0.00155415	0.00136392	0.00149497	0.000825767	0.000748583	0.00138616	0.00157812	0.00181188		0.0273414
GO:0051260	protein homooligomerization	macromolecular turnover	0.00237461	0.00160218	0.00283217	0.00266043	0.00149125	0.00196764	0.00244468	0.00174955	0.00199948	0.00135096	0.00134906	0.00169292	0.00115225	0.0021053		0.0267725
GO:0019882	antigen processing and presentation	immune response	0.00300079	0.000532506	0.000335994	0.00106164	0.00303941	0.000795816	0.00545527	0.000431513	0.00239827	0.0011181	0.00145378	0.00469267	0.000559677	0.00153954		0.026415
GO:0007267	cell-cell signaling	signal transduction	0.00164107	0.00126944	0.00120369	0.00127583	0.00130298	0.00149797	0.00296116	0.00154011	0.00222291	0.000951807	0.00534388	0.00279795	0.000713858	0.00149922		0.0262219
GO:0007283	spermatogenesis	development	0.00186657	0.00193441	0.00228192	0.00134148	0.00207973	0.00220845	0.00170292	0.00190376	0.0013635	0.000945328	0.00111215	0.0014101	0.00141885	0.00464628		0.0262154
GO:0006879	cellular iron ion homeostasis	metabolic process	0.00149275	0.000478131	0.000540642	0.000455903	0.000359429	0.000403145	0.00265933	0.00138123	0.00119026	0.000438296	0.0136806	0.00120485	0.000553772	0.000732804		0.0255711
GO:0007169	transmembrane receptor protein tyrosine kinase signaling pathway	signal transduction	0.00849779	0.000333074	0.000325842	0.000747768	0.00106026	0.000377699	0.00365509	0.00142309	0.00249555	0.00144363	0.000317697	0.0013722	0.000694137	0.00260755		0.0253514
GO:0001501	skeletal development	development	0.00303051	0.00161803	0.00139635	0.00136676	0.000937381	0.00179679	0.00336337	0.00145983	0.00252965	0.00125971	0.000950625	0.00177787	0.00114883	0.00246229		0.025098
GO:0006281	DNA repair	regulation of cell proliferation	0.00117505	0.0030702	0.00283092	0.00142206	0.00280652	0.0025987	0.00118239	0.00128804	0.00107759	0.000984402	0.000528459	0.00108861	0.00313438	0.00183714		0.0250245
GO:0006413	translational initiation	translation	0.00213625	0.00191524	0.00191739	0.00153492	0.0020889	0.00180372	0.00156574	0.00143972	0.00221648	0.00232155	0.000835817	0.0012065	0.00191513	0.00168407		0.0245814
GO:0006816	calcium ion transport	transport	0.00172833	0.00177925	0.00120137	0.00141267	0.00101825	0.0014996	0.00171283	0.00187694	0.00181139	0.00193177	0.000984817	0.00176632	0.00394281	0.00190298		0.0245693
GO:0006260	DNA replication	regulation of cell proliferation	0.00157658	0.00197297	0.00256726	0.00142183	0.00321678	0.00286893	0.00141287	0.0015023	0.00167621	0.000904563	0.000898211	0.00128505	0.00125739	0.00192156		0.0244825
GO:0006396	RNA processing	macromolecular turnover	0.00154537	0.00256783	0.00269942	0.00161019	0.00239796	0.00220348	0.00183391	0.00168318	0.00125069	0.00117871	0.000469701	0.00133915	0.00166155	0.00201515		0.0244563
GO:0045892	negative regulation of transcription, DNA-dependent	macromolecular turnover	0.00196374	0.00244502	0.00232075	0.00188262	0.00183698	0.00237836	0.00194068	0.00101826	0.00172225	0.00122996	0.000464616	0.00186333	0.00173983	0.00152633		0.0243327
GO:0045214	sarcomere organization	muscle contraction	0.000947165	0.00489233	0.00367182	0.00136566	0.000824764	0.00716091	0.00140461	0.000467466	0.000823714	0.000562392	0.000204017	0.000609769	0.000250027	0.000660022		0.0238447
GO:0001503	ossification	development	0.00785892	0.000540028	0.000655881	0.000433707	0.00125171	0.000868804	0.00256048	0.00124689	0.00239108	0.000908251	0.000665718	0.00104272	0.000698054	0.0026855		0.0238077
GO:0002474	antigen processing and presentation of peptide antigen via MHC class I	immune response	0.00252025	0.000493675	0.00027302	0.000831208	0.0015968	0.000598981	0.00397858	0.000608133	0.00237761	0.00160628	0.00105579	0.00522401	0.00054943	0.00145136		0.0231651
GO:0006941	striated muscle contraction	muscle contraction	0.00128746	0.000707337	0.000403463	0.00067993	0.000491158	0.000511581	0.000517361	0.000526571	0.00274669	0.00656935	4.71476e-05	0.000379105	0.00647737	0.00163036		0.0229749
GO:0006006	glucose metabolic process	metabolic process	0.0014625	0.0011964	0.00171952	0.00226513	0.00229486	0.0010276	0.00133488	0.00125687	0.00121506	0.00212223	0.0008593	0.000821709	0.00421175	0.00101711		0.0228049
GO:0006986	response to unfolded protein	signal transduction	0.00113348	0.00179079	0.00155424	0.00177292	0.0015278	0.00167416	0.00102021	0.00130039	0.00256344	0.00142274	0.000787691	0.00237085	0.00178227	0.00177475		0.0224757
GO:0006869	lipid transport	transport	0.00117873	0.000734084	0.000869068	0.000916709	0.000983696	0.000812965	0.00137022	0.00105631	0.0007524	0.000925656	0.00940251	0.000949786	0.000740224	0.000983383		0.0216757
GO:0001666	response to hypoxia	other	0.00108791	0.00053374	0.000556722	0.000638395	0.000510592	0.00052107	0.00119388	0.000949887	0.000608679	0.0098648	0.000780093	0.000438334	0.00263068	0.000540272		0.0208551
GO:0045454	cell redox homeostasis	metabolic process	0.00110555	0.0014231	0.00239046	0.00140275	0.0018899	0.00189196	0.00113229	0.00089667	0.00134727	0.00118431	0.00218212	0.00131209	0.000886285	0.00133375		0.0203785
GO:0007018	microtubule-based movement	cytoskeleton	0.00101111	0.000996542	0.00184417	0.00134433	0.00199829	0.00200301	0.000727403	0.00463746	0.000771635	0.000870247	0.000188243	0.000504238	0.0007006	0.00211319		0.0197105
GO:0007601	visual perception	other	0.00222855	0.000955793	0.0008212	0.00115809	0.00120507	0.000910771	0.0024614	0.00179294	0.00158096	0.00182352	0.000464584	0.00148396	0.000953576	0.00155628		0.0193967
GO:0051258	protein polymerization	metabolic process	0.000666701	0.000416818	0.000725789	0.000806434	0.00126704	0.00120637	0.000442474	0.00268063	0.000506494	0.0004497	0.00816015	0.000263666	0.000306998	0.00130499		0.0192043
GO:0016567	protein ubiquitination	macromolecular turnover	0.00147057	0.00183675	0.00169539	0.00125123	0.0018582	0.00156317	0.00115839	0.00120205	0.0012889	0.00102716	0.000475618	0.00118878	0.00129404	0.00185362		0.0191639
GO:0007268	synaptic transmission	signal transduction	0.000942671	0.000588836	0.000591052	0.000602091	0.000807363	0.000827705	0.000784181	0.00919492	0.00102719	0.000807407	0.000195185	0.000535752	0.00101063	0.00120545		0.0191204
GO:0007017	microtubule-based process	cytoskeleton	0.00104219	0.00113242	0.0018628	0.00120778	0.00180362	0.0019709	0.000765998	0.00373373	0.000885257	0.00107563	0.000286884	0.000608685	0.000670256	0.00196089		0.019007
GO:0006418	tRNA aminoacylation for protein translation	translation	0.000965873	0.00193489	0.00171954	0.00154973	0.00217043	0.00198963	0.000948713	0.0016466	0.000880255	0.000925159	0.000470106	0.000851931	0.00144764	0.00121276		0.0187133
GO:0016311	dephosphorylation	signal transduction	0.00149611	0.00148712	0.00181236	0.00137158	0.0010623	0.00157803	0.00133058	0.00125439	0.000934752	0.00176522	0.000359843	0.00109711	0.00166627	0.00137514		0.0185908
GO:0006633	fatty acid biosynthetic process	metabolic process	0.00384882	0.000918414	0.00222238	0.000725861	0.000751794	0.00113389	0.000861486	0.00264966	0.000468188	0.00114153	0.000496368	0.000413657	0.000331453	0.00261555		0.0185791
GO:0001539	ciliary or flagellar motility	cytoskeleton	0.00106673	0.000900586	0.0011314	0.000831472	0.00124389	0.00107997	0.000986267	0.00520578	0.0014439	0.000891336	0.000555082	0.000908437	0.000632272	0.00166629		0.0185434
GO:0006826	iron ion transport	transport	0.00205778	0.000688307	0.000780292	0.00063321	0.00103114	0.000745496	0.00333903	0.00185239	0.00150114	0.000864572	0.00178351	0.00137446	0.000790749	0.00109734		0.0185394
GO:0006817	phosphate transport	transport	0.00336291	0.000155756	0.000354209	0.000754735	0.000803946	0.000173154	0.00390118	0.000652566	0.00261036	0.000931428	0.000699646	0.00203299	0.000323097	0.00171885		0.0184748
GO:0006874	cellular calcium ion homeostasis	metabolic process	0.00102148	0.000725821	0.000366648	0.000806533	0.000692883	0.000860248	0.00115859	0.000803869	0.00150529	0.00266258	0.00189279	0.00144869	0.00332022	0.00113973		0.0184054
GO:0006917	induction of apoptosis	regulation of cell proliferation	0.00131842	0.00115629	0.00148352	0.00133223	0.00101036	0.00160097	0.00122996	0.00134	0.00187408	0.000898191	0.00128512	0.00121437	0.000875529	0.00171727		0.0183363
GO:0051016	barbed-end actin filament capping	cytoskeleton	0.0034311	0.0003884	0.000381183	0.000700154	0.000901013	0.000582331	0.00352287	0.00111591	0.00233265	0.00118009	0.000112429	0.00104947	0.00139957	0.00119263		0.0182898
GO:0006631	fatty acid metabolic process	metabolic process	0.00170424	0.000655297	0.000810172	0.000542649	0.000559825	0.000676878	0.00116817	0.000693718	0.00118374	0.00182729	0.00555291	0.000446479	0.00164067	0.000624433		0.0180865
GO:0007243	protein kinase cascade	signal transduction	0.000974974	0.00122313	0.00146953	0.00134963	0.00195376	0.00137694	0.00180222	0.00132448	0.00123954	0.000839436	0.000480523	0.00109644	0.0014381	0.00132285		0.0178916
GO:0007596	blood coagulation	other	0.00157195	0.000410504	0.000314149	0.000769938	0.0009432	0.000424918	0.00272331	0.000370653	0.00195731	0.0010249	0.0035937	0.00163967	0.000653455	0.00142035		0.017818
GO:0051301	cell division	regulation of cell proliferation	0.000990154	0.00202468	0.0021593	0.00132021	0.00193325	0.00229762	0.000910518	0.00116242	0.00080821	0.000782771	0.000344481	0.000986522	0.00066809	0.00140354		0.0177918
GO:0006139	nucleobase, nucleoside, nucleotide and nucleic acid metabolic process	metabolic process	0.00101452	0.00139082	0.00182977	0.00106698	0.00177945	0.00175606	0.00091899	0.00165754	0.000970464	0.00126768	0.000720184	0.000860824	0.00107171	0.00109535		0.0174003
GO:0006807	nitrogen compound metabolic process	metabolic process	0.000546063	0.000739458	0.000193021	0.00124265	0.00017369	0.000693067	0.00327971	0.00231275	0.00079006	0.000551947	0.000569124	0.000804376	0.00392064	0.000692694		0.0165093
GO:0045786	negative regulation of progression through cell cycle	regulation of cell proliferation	0.00153782	0.00118632	0.00165538	0.00116366	0.00118223	0.00144759	0.00147171	0.00131668	0.00123298	0.000667082	0.000382035	0.00102083	0.000932349	0.00130164		0.0164983
GO:0016568	chromatin modification	macromolecular turnover	0.000863762	0.00180159	0.00204822	0.000996152	0.00164366	0.00182596	0.00087129	0.00129201	0.000817293	0.000745874	0.00029415	0.000834022	0.000854216	0.00154656		0.0164348
GO:0006940	regulation of smooth muscle contraction	muscle contraction	0.000920051	0.0011512	0.000626126	0.00054263	0.000569087	0.000423061	0.00126123	0.000163675	0.00283282	0.00388211	0.000262028	0.00133196	0.00118408	0.00111989		0.0162699
GO:0009409	response to cold	other	0.00127809	0.00107352	0.00133841	0.000726212	0.000531021	0.000956848	0.00167029	0.000930695	0.00107608	0.000690229	0.000440026	0.000549576	0.00386634	0.0011209		0.0162482
GO:0045445	myoblast differentiation	development	0.00430301	0.000150072	1.28623e-05	0.00153592	0.00308247	0.000875548	0.0017898	0.000253765	0.00154186	0.00053101	0.000167638	0.000610455	0.000459319	0.000933265		0.016247
GO:0007067	mitosis	regulation of cell proliferation	0.000737322	0.00145738	0.00193102	0.000989136	0.00218574	0.00213407	0.000676461	0.001514	0.000638896	0.000715653	0.00026828	0.000817777	0.00084999	0.00127925		0.016195
GO:0007417	central nervous system development	development	0.000778075	0.000543388	0.000261265	0.00205908	0.00137971	0.000341736	0.000961825	0.00638332	0.000997226	0.000426982	0.000127215	0.000586134	0.000542509	0.000714192		0.0161027
GO:0008217	regulation of blood pressure	other	0.0006053	0.000196829	0.000156124	0.00049973	0.000372243	0.000274388	0.000471953	0.000948708	0.00105735	0.00185847	0.00850933	0.000238431	0.000107688	0.00066426		0.0159608
GO:0016055	Wnt receptor signaling pathway	development	0.000916524	0.00149056	0.00189678	0.000874777	0.00100244	0.00261617	0.000827145	0.00118188	0.00102328	0.000861478	0.000374241	0.000923212	0.000623231	0.00121212		0.0158238
GO:0009653	anatomical structure morphogenesis	development	0.00150693	0.00112401	0.000968501	0.00144725	0.00109368	0.00108891	0.00148243	0.00106808	0.00137578	0.00082812	0.000367863	0.000858799	0.000978438	0.00130551		0.0154943
GO:0006520	amino acid metabolic process	metabolic process	0.000979014	0.00134228	0.00127834	0.00124607	0.0013472	0.00126179	0.000841735	0.00108197	0.000725308	0.000904642	0.00192971	0.000708952	0.000912234	0.000907813		0.0154671
GO:0007266	Rho protein signal transduction	signal transduction	0.000967057	0.00114289	0.00236447	0.00105453	0.00199116	0.00169344	0.00123335	0.00117821	0.00107719	0.000402849	0.000271914	0.000869195	0.000244007	0.000745111		0.0152354
GO:0042593	glucose homeostasis	metabolic process	0.000872071	0.00120624	0.00067171	0.00183044	0.00173807	0.000976501	0.00124231	0.000548492	0.00130549	0.000745598	0.000518888	0.00201058	0.000656155	0.000885966		0.0152085
GO:0006417	regulation of translation	translation	0.000849706	0.00120983	0.00122087	0.000838275	0.00100778	0.00113328	0.00128693	0.00144459	0.00122371	0.00091784	0.000408186	0.000992316	0.00155861	0.00106622		0.0151581
GO:0007160	cell-matrix adhesion	cytoskeleton	0.00128145	0.000689284	0.00078858	0.00175097	0.00118063	0.000829914	0.00133868	0.00091813	0.00101146	0.00061493	0.00262826	0.000774261	0.000381588	0.000961922		0.0151501
GO:0042254	ribosome biogenesis and assembly	translation	0.000670448	0.0020381	0.00157169	0.0015333	0.00177409	0.00175009	0.000828711	0.000605308	0.00101444	0.000417825	0.000391521	0.000959051	0.000656147	0.00088269		0.0150934
GO:0007050	cell cycle arrest	regulation of cell proliferation	0.00119064	0.000935537	0.00112819	0.000947504	0.0013504	0.000942761	0.000947004	0.00105284	0.00101016	0.00115175	0.00026485	0.00115593	0.00155515	0.00142821		0.0150609
GO:0007001	chromosome organization and biogenesis (sensu Eukaryota)	macromolecular turnover	0.000769653	0.00268397	0.00113754	0.0010456	0.00114822	0.00128695	0.00115352	0.00114944	0.00100456	0.000459211	0.000242973	0.000926435	0.000551318	0.00146388		0.0150233
GO:0007420	brain development	development	0.000636251	0.000509917	0.000374862	0.000994969	0.00059325	0.000503344	0.000577779	0.00443571	0.00314589	0.000839993	0.000102821	0.000359806	0.000342807	0.00138488		0.0148023
GO:0016481	negative regulation of transcription	macromolecular turnover	0.00145002	0.00107458	0.00104424	0.000702226	0.000899147	0.000931615	0.00220624	0.000907938	0.00111522	0.000859454	0.000292839	0.000910729	0.000896321	0.0011423		0.0144329
GO:0006935	chemotaxis	immune response	0.00120583	0.000524396	0.000687865	0.00144487	0.00124789	0.000870045	0.00130701	0.000748092	0.000742183	0.00040085	0.0005197	0.00184178	0.000451908	0.00225602		0.0142484
GO:0030855	epithelial cell differentiation	development	0.000452422	7.13733e-05	7.57755e-05	0.0132304	1.29425e-05	6.89711e-05	4.4835e-05	9.78443e-06	3.60686e-05	1.88996e-05	2.1652e-05	2.68371e-05	9.98043e-06	2.63893e-05		0.0141063
GO:0016049	cell growth	regulation of cell proliferation	0.00122164	0.000963125	0.000597972	0.0011572	0.00106906	0.00112049	0.00175709	0.000527416	0.00191969	0.000545463	0.000283727	0.000778538	0.000555359	0.00140783		0.0139046
GO:0015671	oxygen transport	transport	0.000672291	4.97638e-05	7.6749e-05	1.54595e-06	4.65252e-05	2.25877e-05	0.000351377	0.000121764	0.000812156	0.00960559	6.04011e-06	0.000111305	0.0016723	0.000266958		0.013817
GO:0008015	blood circulation	immune response	0.0013485	0.000146323	0.000133877	0.000262646	0.000368502	0.000407959	0.00164196	0.000343424	0.00110071	0.000685956	0.00472086	0.00112418	0.000335099	0.00118467		0.0138047
GO:0006958	complement activation, classical pathway	immune response	0.000954045	0.000161014	4.91436e-05	8.90856e-05	4.46642e-05	0.000229357	0.00165089	0.000891533	0.00147226	0.000698155	0.00382469	0.00201027	0.000336691	0.00137587		0.0137877
GO:0006957	complement activation, alternative pathway	metabolic process	0.00409148	9.95276e-06	1.82013e-06	4.09678e-05	4.22956e-06	1.96574e-05	0.00223902	1.23996e-05	0.00301302	0.000439017	0.0014518	0.00109924	0.000181542	0.00101717		0.0136213
GO:0006898	receptor-mediated endocytosis	transport	0.00112839	0.00150203	0.00120656	0.000920046	0.00123933	0.00159723	0.00110118	0.000682984	0.000651364	0.000416659	0.00124927	0.000678423	0.00032835	0.000876242		0.0135781
GO:0006486	protein amino acid glycosylation	macromolecular turnover	0.000870538	0.000949189	0.000985845	0.000864556	0.00141722	0.00125923	0.00108561	0.000900213	0.00122182	0.000593604	0.000769832	0.000997383	0.000620594	0.00097127		0.0135069
GO:0045941	positive regulation of transcription	macromolecular turnover	0.00105929	0.00130341	0.000893706	0.000871176	0.00124068	0.000775218	0.00112052	0.000763877	0.00113274	0.000677347	0.00051543	0.00107313	0.000973807	0.000981423		0.0133818
GO:0045944	positive regulation of transcription from RNA polymerase II promoter	macromolecular turnover	0.00107375	0.00106188	0.00122094	0.000884921	0.00118526	0.000976139	0.00139314	0.00085111	0.00103127	0.000720433	0.000267873	0.000794685	0.000801558	0.000977477		0.0132404
GO:0030168	platelet activation	immune response	0.00047697	0.000267029	0.000167002	0.000351292	0.000216412	4.83295e-05	0.000377065	0.00024136	0.000307877	0.000113583	0.0102256	0.000147911	5.18134e-05	0.000119495		0.0131117
GO:0016337	cell-cell adhesion	cytoskeleton	0.00130184	0.00080744	0.000700821	0.00167857	0.000702214	0.00128717	0.00138165	0.000839434	0.000918782	0.000687716	0.000218289	0.00127706	0.00034695	0.000721393		0.0128693
GO:0008033	tRNA processing	macromolecular turnover	0.00067874	0.00154724	0.00155879	0.000901871	0.00124264	0.00146118	0.000601804	0.000790889	0.000584062	0.000598911	0.00041944	0.000637318	0.000817634	0.000864809		0.0127053
GO:0008654	phospholipid biosynthetic process	metabolic process	0.00112216	0.00112387	0.000859452	0.000556631	0.000940876	0.00113294	0.00102452	0.000973391	0.00107998	0.000757356	0.000404829	0.000909582	0.000408578	0.00140234		0.0126965
GO:0006913	nucleocytoplasmic transport	transport	0.000831559	0.00102441	0.00119536	0.000889399	0.00111356	0.00127658	0.000838858	0.00135347	0.000826587	0.000755923	0.000288108	0.000690021	0.000527071	0.000840681		0.0124516
GO:0009058	biosynthetic process	metabolic process	0.00116334	0.000807998	0.00127767	0.000947935	0.00124874	0.00128888	0.000792901	0.000929854	0.000433459	0.000619281	0.000979907	0.00045675	0.000604136	0.000876024		0.0124269
GO:0001525	angiogenesis	other	0.0010621	0.000808939	0.000953273	0.000821096	0.000863575	0.000885441	0.00156139	0.000715429	0.000957379	0.000849882	0.000440507	0.000721467	0.000587175	0.0010061		0.0122338
GO:0006605	protein targeting	transport	0.000640135	0.00110655	0.00211728	0.000835389	0.00145024	0.000975911	0.000731484	0.00101892	0.000691675	0.000612235	0.000289274	0.000492763	0.000548475	0.000694733		0.0122051
GO:0007156	homophilic cell adhesion	cytoskeleton	0.000795546	0.000993859	0.000778999	0.00155956	0.000516564	0.000739119	0.00100935	0.00212682	0.000837604	0.000829908	0.000267504	0.000622652	0.000386203	0.000732145		0.0121958
GO:0045087	innate immune response	immune response	0.000952381	0.00022919	0.000124801	8.41948e-05	0.00011464	0.000300783	0.00159461	0.000936044	0.00123291	0.000603697	0.00273897	0.00160826	0.000367252	0.00129561		0.0121833
GO:0032313	regulation of Rab GTPase activity	signal transduction	0.00100549	0.00109173	0.000983631	0.000708125	0.0011961	0.000947279	0.000832924	0.00104603	0.000694759	0.000667796	0.000269632	0.000963415	0.000804155	0.000815912		0.012027
GO:0030041	actin filament polymerization	cytoskeleton	0.0023718	0.000262651	0.000299715	0.000403953	0.000532591	0.000429272	0.00280328	0.000459246	0.00187683	0.000615145	3.17737e-05	0.000797662	0.00032154	0.000802281		0.0120077
GO:0008344	adult locomotory behavior	cytoskeleton	0.00152179	0.00087725	0.000424321	0.0011565	0.000712646	0.00049211	0.00105136	0.0013529	0.000948819	0.000507342	0.000644641	0.00125863	0.000273123	0.000723009		0.0119444
GO:0006839	mitochondrial transport	transport	0.000843775	0.00102774	0.00145034	0.000670972	0.00116056	0.000971358	0.00053495	0.000634625	0.00052363	0.00198112	0.000546466	0.000416426	0.000670318	0.000486909		0.0119192
GO:0009405	pathogenesis	development	0.000657737	0.000964408	0.00136398	0.000640727	0.00124479	0.00132835	0.000728311	0.000869273	0.000406537	0.00094061	0.000519924	0.000691583	0.000628941	0.000595645		0.0115808
GO:0009060	aerobic respiration	metabolic process	0.000478435	0.000809602	0.000728903	0.000582091	0.000650887	0.000810227	0.000391509	0.000940222	0.000624512	0.00333302	0.000420505	0.000405861	0.000801789	0.000463095		0.0114407
GO:0006099	tricarboxylic acid cycle	metabolic process	0.000630031	0.000753645	0.00112672	0.000440984	0.000738608	0.00127907	0.000399763	0.000762908	0.000423609	0.00195993	0.000636515	0.000281919	0.00143115	0.000407264		0.0112721
GO:0008202	steroid metabolic process	metabolic process	0.000922769	0.000653002	0.000665512	0.000587372	0.000556956	0.000573097	0.000650198	0.000630507	0.000305936	0.000336987	0.00396158	0.000333129	0.000392849	0.000663372		0.0112333
GO:0042632	cholesterol homeostasis	metabolic process	0.00149537	0.000386013	0.000244756	0.00101914	0.000449448	0.00062973	0.00222942	0.000435699	0.00076845	0.000445023	0.000865367	0.000802648	0.000221703	0.00123978		0.0112325
GO:0006730	one-carbon compound metabolic process	metabolic process	0.000500916	0.00126676	0.000758996	0.00123638	0.000745079	0.00163944	0.000629433	0.00144059	0.00042726	0.000218475	0.000944908	0.000367311	0.000557172	0.000481827		0.0112145
GO:0051272	positive regulation of cell motility	regulation of cell proliferation	0.000615643	0.00113126	0.000710223	0.00123135	0.000632618	0.000657504	0.000991375	0.000322433	0.00143941	0.000226891	0.000345519	0.0017476	0.000471831	0.000665686		0.0111893
GO:0007585	respiratory gaseous exchange	metabolic process	0.000608598	0.000684722	0.000610615	0.00046304	0.000877747	0.000503604	0.000470227	0.00121578	0.000829536	0.00200835	0.000541003	0.000444597	0.00119037	0.000689158		0.0111373
GO:0030218	erythrocyte differentiation	development	0.000550644	0.00110592	0.000761388	0.00108026	0.000614857	0.000706236	0.000909786	0.000332655	0.00142074	0.000253508	0.000370972	0.00182886	0.000483239	0.000711597		0.0111307
GO:0030163	protein catabolic process	metabolic process	0.000635651	0.00098418	0.000900221	0.000533537	0.00118107	0.00105812	0.000611458	0.000821481	0.000709902	0.000698475	0.000485087	0.000459108	0.000938975	0.000872793		0.0108901
GO:0008219	cell death	regulation of cell proliferation	0.000876858	0.000549963	0.000556143	0.000445888	0.000634081	0.000629845	0.000729841	0.00192436	0.000928458	0.000446467	0.000491346	0.00076575	0.000753255	0.00105113		0.0107834
GO:0001843	neural tube closure	development	0.00054473	0.000647947	0.000893662	0.000629133	0.00151316	0.000762983	0.00075775	0.000491273	0.00100873	0.00032388	0.000311284	0.000773578	0.000658762	0.00074209		0.010059
GO:0045893	positive regulation of transcription, DNA-dependent	macromolecular turnover	0.000522202	0.000746516	0.00103352	0.000678274	0.000782438	0.000904574	0.000651647	0.000678896	0.000491237	0.00103879	0.000223206	0.000600774	0.000712017	0.000929347		0.00999344
GO:0030308	negative regulation of cell growth	regulation of cell proliferation	0.000749594	0.000784877	0.000990518	0.00108061	0.00108029	0.000997089	0.000565219	0.000714092	0.000509402	0.000407456	0.000629313	0.000442656	0.000263263	0.000670318		0.0098847
GO:0010033	response to organic substance	immune response	0.000126883	0.000144962	0.000124093	8.69297e-05	8.88899e-05	0.000126246	0.0001839	0.000171279	8.80371e-05	9.9489e-05	0.00824624	0.000120219	0.000113549	0.00015856		0.00987928
GO:0044237	cellular metabolic process	metabolic process	0.000769157	0.000921049	0.00119444	0.00064476	0.000954727	0.00125203	0.00058887	0.000405633	0.000559423	0.000423309	0.000519862	0.000532246	0.000580744	0.000508999		0.00985525
GO:0007154	cell communication	cytoskeleton	0.00066624	0.000629997	0.0006399	0.000825641	0.000916952	0.00069671	0.000798453	0.00110145	0.000694249	0.00065998	0.000294671	0.000579914	0.000539813	0.000753278		0.00979725
GO:0040008	regulation of growth	regulation of cell proliferation	0.00141905	0.000656771	0.000520697	0.0010609	0.00137975	0.000505546	0.00105628	0.000736431	0.000796749	0.000329529	0.000196968	0.000435723	0.000187247	0.000456156		0.0097378
GO:0035023	regulation of Rho protein signal transduction	signal transduction	0.00089144	0.000523626	0.000965373	0.000768649	0.000713856	0.000727655	0.000933019	0.00121696	0.000689912	0.000451029	0.00019514	0.000593467	0.000413822	0.000578902		0.00966285
GO:0042157	lipoprotein metabolic process	metabolic process	7.77107e-05	2.48029e-05	2.81081e-05	4.15148e-05	3.1048e-05	0.000155995	0.000117741	0.000127002	8.71269e-05	9.12248e-05	0.00823785	0.000266197	1.95688e-05	0.000293285		0.00959917
GO:0007584	response to nutrient	metabolic process	0.000830628	0.00057432	0.000398699	0.000257363	0.000298776	0.00159151	0.000708469	0.00031127	0.000692546	0.000448029	0.00179019	0.000543045	0.000232956	0.000731607		0.00940941
GO:0008203	cholesterol metabolic process	metabolic process	0.000809633	0.000460381	0.000670197	0.00041277	0.000459628	0.000447305	0.00064833	0.000465271	0.000273953	0.000274794	0.00331437	0.000285529	0.000327864	0.000555175		0.0094052
GO:0043087	regulation of GTPase activity	signal transduction	0.000796925	0.0006602	0.000804166	0.000623445	0.000760792	0.000732539	0.000711705	0.00128014	0.000475477	0.000410662	0.000216448	0.00061712	0.000508965	0.000644537		0.00924312
GO:0006695	cholesterol biosynthetic process	metabolic process	0.000908427	0.000606602	0.00104476	0.000607199	0.00048788	0.000919523	0.000954839	0.000693663	0.000388071	0.000452778	0.000565517	0.000315494	0.000767206	0.00052988		0.00924184
GO:0001516	prostaglandin biosynthetic process	metabolic process	0.000453832	0.000471037	0.000435497	0.000628174	0.00107595	0.000571258	0.000622488	0.000490988	0.000519083	0.000611949	0.000128367	0.000739198	0.000116892	0.00236759		0.0092323
GO:0051301	glycogen metabolic process	metabolic process	0.00144495	0.000345029	0.000340668	0.000352168	0.000434672	0.000340708	0.00186354	0.000550378	0.000307718	0.000659904	0.000352673	0.000190799	0.00178069	0.000226332		0.00919023
GO:0006801	superoxide metabolic process	metabolic process	0.000381446	0.000421364	0.000208001	0.000163055	0.000150032	0.000134712	0.000783064	0.000235676	0.000489033	0.00028839	0.000254279	0.00109624	0.00425383	0.000281974		0.0091411
GO:0006821	chloride transport	transport	0.000601575	0.000762484	0.000593864	0.00140398	0.000621713	0.00068587	0.000569185	0.000822631	0.000982398	0.0004585	0.000139751	0.00039896	0.000620923	0.000446631		0.00910846
GO:0006754	ATP biosynthetic process	metabolic process	0.000513289	0.000722357	0.000675981	0.000423547	0.000562815	0.000612048	0.000261291	0.00103239	0.000673172	0.00124986	0.000521666	0.00031011	0.000479945	0.00103131		0.00906978
GO:0030521	androgen receptor signaling pathway	signal transduction	0.00208455	0.000469609	0.00159811	0.000355583	0.000545195	0.000513734	0.00043425	0.000356504	0.000535056	0.000758391	8.27641e-05	0.000376599	0.00019519	0.00051414		0.00881968
GO:0030433	ER-associated protein catabolic process	transport	0.000609195	0.000815813	0.00050104	0.000643686	0.00070487	0.000559774	0.000663393	0.000413573	0.000608451	0.00036057	0.000298984	0.00089793	0.00108873	0.000645609		0.00881162
GO:0006974	response to DNA damage stimulus	other	0.000596557	0.000611306	0.000321876	0.000391418	0.000524973	0.000343205	0.000681189	0.000447392	0.000707048	0.000555167	0.000153717	0.000882324	0.00199992	0.000587187		0.00880328
GO:0006066	alcohol metabolic process	metabolic process	0.00104821	1.71409e-05	0.000340972	8.27086e-05	3.87005e-05	7.26469e-05	0.00375829	0.000113663	0.000989981	0.000258793	0.00115609	0.000531421	0.000174076	0.000183973		0.00876667
GO:0000226	microtubule cytoskeleton organization and biogenesis	cytoskeleton	0.000461444	0.00106149	0.000686315	0.000477468	0.000824992	0.000770078	0.000436009	0.00164356	0.000324539	0.000215108	0.000191798	0.000370345	0.000334967	0.000791117		0.00858923
GO:0008643	carbohydrate transport	transport	0.000455963	0.000676622	0.000744678	0.000957305	0.000677811	0.000933177	0.000540984	0.000753236	0.00039897	0.000602307	0.000433938	0.000403165	0.000443133	0.000544972		0.00856626
GO:0000245	spliceosome assembly	macromolecular turnover	0.000390291	0.00120999	0.00108334	0.00066025	0.00120484	0.000852873	0.000426456	0.000423689	0.0003475	0.000350239	0.000204141	0.000548087	0.000388796	0.000471818		0.00856231
GO:0007229	integrin-mediated signaling pathway	signal transduction	0.000563898	0.000305611	0.000762944	0.000917099	0.000767392	0.000407813	0.000796632	0.00152648	0.00059035	0.000330154	0.000234337	0.000522828	0.000244714	0.000414942		0.00838519
GO:0019538	protein metabolic process	metabolic process	0.00045491	0.000838409	0.000723989	0.00083497	0.00129539	0.000780069	0.000462379	0.000406625	0.000614196	0.000384915	0.000190242	0.000439661	0.000317503	0.000639648		0.00838291
GO:0030866	cortical actin cytoskeleton organization and biogenesis	cytoskeleton	0.00146159	0.000330929	0.00017898	0.000430355	0.000643951	0.000572018	0.00086342	0.00076051	0.00084853	0.000274989	0.000591627	0.000481885	0.000196866	0.000675074		0.00831072
GO:0009267	cellular response to starvation	other	2.53376e-05	2.36378e-05	2.6847e-05	1.88859e-05	1.83986e-05	2.38087e-05	5.43955e-06	1.92194e-05	5.84948e-06	1.55069e-06	0.00810867	5.30747e-06	7.16271e-06	1.65611e-05		0.00830668
GO:0007411	axon guidance	development	0.000658972	0.000790547	0.000362306	0.000639022	0.000656292	0.000388651	0.000707544	0.000973028	0.000770174	0.00030937	0.000186346	0.000631064	0.000580942	0.00055382		0.00820808
GO:0050896	response to stimulus	other	0.000946097	0.00037138	0.000434713	0.000460103	0.000609991	0.0004181	0.00163611	0.000556852	0.000615811	0.000375449	0.000180173	0.000509764	0.000324366	0.000683151		0.00812206
GO:0007519	skeletal muscle development	muscle contraction	0.000476486	0.000496562	0.000492908	0.000307144	0.000578081	0.000576338	0.000502313	0.000353142	0.00090102	0.000747576	0.000133204	0.000488915	0.000993073	0.000933519		0.00798028
GO:0008104	protein localization	macromolecular turnover	0.000864771	0.000596955	0.000465395	0.000636194	0.000609701	0.0005502	0.000708076	0.000648347	0.000739508	0.000412596	0.000243651	0.000515609	0.000328804	0.000609761		0.00792957
GO:0006814	sodium ion transport	transport	0.000493401	0.000523374	0.000584988	0.000577412	0.000555066	0.000467925	0.000446377	0.00129002	0.000430939	0.000519412	0.000385603	0.000333106	0.000804206	0.000486588		0.00789842
GO:0007026	negative regulation of microtubule depolymerization	cytoskeleton	0.000628556	0.000290427	0.000224353	0.000479395	0.00044679	0.000240637	0.000454359	0.001327	0.000513653	0.000849423	8.29351e-05	0.00022035	0.00156657	0.000468014		0.00779246
GO:0009615	response to virus	other	0.000456419	0.000891718	0.000800796	0.000401841	0.000695285	0.000403446	0.000564718	0.000389531	0.000572114	0.000412258	0.000212283	0.000710449	0.000452507	0.000652999		0.00761636
GO:0006749	glutathione metabolic process	metabolic process	0.00117695	0.000441461	0.000502102	0.000442755	0.000485517	0.000392542	0.000893995	0.00027895	0.000404072	0.000450692	0.000860526	0.000398932	0.000294933	0.000552186		0.00757561
GO:0006820	anion transport	transport	0.000545941	0.0004518	0.000588935	0.000433756	0.000575474	0.000550407	0.000544818	0.000726039	0.000474234	0.00101932	0.000156869	0.000407041	0.00057115	0.000508617		0.0075544
GO:0001701	in utero embryonic development	development	0.000400669	0.000529718	0.000628309	0.000402266	0.000439831	0.000397534	0.000513994	0.000335883	0.000527788	0.00206434	8.89909e-05	0.000325396	0.000484194	0.000379426		0.00751834
GO:0006939	smooth muscle contraction	muscle contraction	0.000231184	1.80457e-05	4.49242e-05	7.24541e-05	0.000127733	0.000137815	0.000349866	0.000123937	0.00295143	0.00140931	0.000171906	0.000326805	0.000134433	0.00137361		0.00747345
GO:0006968	cellular defense response	other	0.00079142	0.000557576	0.000202601	0.000338222	0.000936402	0.000259718	0.000653023	0.000445808	0.00086345	0.000377169	0.000333414	0.000861568	0.000157216	0.000631894		0.00740948
GO:0006302	double-strand break repair	macromolecular turnover	0.000178848	0.000183135	0.000254785	0.000186764	0.000192421	0.000171192	0.000416631	0.000228443	0.000243655	0.00030693	0.000236162	0.000251598	0.00428972	0.000196214		0.0073365
GO:0006613	cotranslational protein targeting to membrane	other	0.000522108	0.00068674	0.000413777	0.000303394	0.000644585	0.000976155	0.000419968	0.00108538	0.000445624	0.000300489	0.00041629	0.000427293	0.000187533	0.000489277		0.00731861
GO:0030198	extracellular matrix organization and biogenesis	cytoskeleton	0.000844377	0.000664097	0.000169243	0.000277695	0.000364255	0.000350686	0.00113924	0.000696054	0.000885823	0.000376849	0.000369971	0.000502236	0.000136057	0.000511981		0.00728856
GO:0009611	response to wounding	other	0.000605765	0.000313799	0.000552907	0.00027302	0.000328323	0.000233177	0.0013086	0.000441134	0.000641164	0.000345523	0.000987517	0.000520232	0.000253639	0.000404346		0.00720915
GO:0009306	protein secretion	macromolecular turnover	0.000474013	0.000659813	0.000606954	0.000383474	0.000811314	0.000696922	0.000457544	0.000328507	0.000521171	0.000292563	0.000775698	0.000436291	0.00024236	0.000465315		0.00715194
GO:0006333	chromatin assembly or disassembly	macromolecular turnover	0.000348059	0.000741156	0.000888185	0.000324382	0.000752324	0.00088679	0.000306576	0.00072247	0.000379078	0.000302297	9.94109e-05	0.000336702	0.000362873	0.000684979		0.00713528
GO:0006614	SRP-dependent cotranslational protein targeting to membrane	macromolecular turnover	0.00100521	0.000547125	0.000470808	0.000396151	0.000636337	0.000849786	0.00060992	0.000360829	0.000505537	0.00036355	0.00020771	0.000373545	0.000239842	0.000531849		0.0070982
GO:0051028	mRNA transport	macromolecular turnover	0.000352246	0.000660663	0.000832012	0.000496128	0.000887654	0.000730908	0.000479463	0.00051349	0.000340879	0.000298264	0.000168184	0.000397923	0.000358437	0.000576415		0.00709267
GO:0001836	release of cytochrome c from mitochondria	metabolic process	0.000149326	0.000729032	9.3968e-05	0.000195845	9.38606e-05	6.83662e-05	0.000411469	0.000117091	0.00020764	0.000210089	0.000103039	0.000256255	0.00422509	0.00014154		0.00700261
GO:0006289	nucleotide-excision repair	macromolecular turnover	0.000369947	0.000629886	0.000488117	0.00041844	0.0004623	0.000544152	0.000408015	0.000380511	0.000402041	0.00029445	0.00011737	0.000248023	0.00171406	0.000459436		0.00693675
GO:0006094	gluconeogenesis	metabolic process	0.00104681	0.000813377	0.000482537	0.000341971	0.000349483	0.000359406	0.00082477	0.000241539	0.000240306	0.000173062	0.0014583	0.000168948	0.000193505	0.000227615		0.00692163
GO:0055010	ventricular cardiac muscle morphogenesis	muscle contraction	0.000318793	0	0	0	6.34434e-07	5.4943e-06	0	1.23996e-06	1.06354e-06	0.00472989	0	8.34031e-06	0.00159794	0.000167628		0.00683102
GO:0042493	response to drug	other	0.000788882	0.000441852	0.000329235	0.000509822	0.000521571	0.000381771	0.000737247	0.000989799	0.000417346	0.00035571	0.000245851	0.000333686	0.000342783	0.000430671		0.00682623
GO:0006259	DNA metabolic process	metabolic process	0.000417806	0.00046288	0.000502126	0.000198594	0.000392097	0.00089181	0.00100678	0.000168832	0.000900827	0.00017923	0.000293938	0.000589589	0.000222437	0.000524861		0.00675181
GO:0006487	protein amino acid N-linked glycosylation	macromolecular turnover	0.000624336	0.000204032	0.000245978	0.000152111	0.000454678	0.000250383	0.000763239	0.000984589	0.000743036	0.000327466	0.000230306	0.000987719	0.000315407	0.000329044		0.00661232
GO:0016310	phosphorylation	signal transduction	0.000332122	0.000353157	0.00031185	0.000257788	0.00034509	0.000398581	0.000510385	0.000565175	0.000351182	0.000944335	0.00032143	0.000288962	0.00105491	0.000390509		0.00642548
GO:0018279	protein amino acid N-linked glycosylation via asparagine	macromolecular turnover	0.000342134	0.000456168	0.000345826	0.000356729	0.000546036	0.000764929	0.00046003	0.000505905	0.000438179	0.000370098	0.000547086	0.000422576	0.000271315	0.000568339		0.00639535
GO:0008286	insulin receptor signaling pathway	signal transduction	0.00050009	0.000415094	0.000316738	0.000327784	0.000733061	0.000489758	0.000847982	0.000297752	0.00041824	0.000441482	0.00020136	0.000300304	0.000613109	0.000467458		0.00637021
GO:0009117	nucleotide metabolic process	metabolic process	0.00040203	0.000702584	0.000713437	0.000428393	0.000804152	0.000788071	0.000298968	0.000349811	0.000338473	0.000348915	0.000208228	0.000339548	0.000252021	0.000389886		0.00636452
GO:0006284	base-excision repair	macromolecular turnover	0.000354914	0.000683585	0.000940479	0.000368236	0.000795412	0.000629122	0.000409931	0.000339514	0.000357903	0.00024176	0.000163431	0.000362406	0.00024643	0.000412189		0.00630531
GO:0006725	aromatic compound metabolic process	metabolic process	0.00076412	0.000334523	0.00036251	0.000260687	0.000683285	0.000489604	0.000572966	0.000688179	0.000431444	0.000311861	0.000279192	0.000348103	0.000212928	0.000561649		0.00630105
GO:0001837	epithelial to mesenchymal transition	development	0.000939414	0.000330349	0.00047337	0.000217846	0.000341796	0.000328422	0.000625105	0.000156514	0.000485091	0.0004051	7.26286e-05	0.00110957	0.000210272	0.000536099		0.00623158
GO:0045446	endothelial cell differentiation	development	0.000385288	0.000848977	0.000513278	0.000434398	0.000398661	0.000877868	0.000351803	0.000301307	0.000369392	0.000298259	0.000270437	0.000312536	0.000293388	0.000414306		0.0060699
GO:0006469	negative regulation of protein kinase activity	signal transduction	0.000776608	0.000242932	0.000293584	0.000153487	0.0003047	0.000193333	0.00164681	0.000278933	0.000670622	0.000434012	0.000118748	0.000345957	0.000188595	0.000418626		0.00606695
GO:0048167	regulation of synaptic plasticity	signal transduction	0.000442778	0.000678354	0.000355836	0.000610072	0.000597672	0.000378344	0.000471117	0.000292446	0.000503983	0.000199407	0.000145281	0.000449349	0.000513255	0.000394353		0.00603225
GO:0006878	cellular copper ion homeostasis	metabolic process	0.000253325	0.000186799	0.000173166	0.000831885	0.00064381	0.000358605	0.000525708	0.000565767	0.000391856	0.000200383	0.00108331	0.000311287	0.000304741	0.000189573		0.00602022
GO:0006865	amino acid transport	transport	0.000318578	0.00105606	0.000464529	0.0010292	0.000378905	0.000437163	0.000283072	0.00033231	0.000283735	0.000156413	0.000170818	0.000488666	0.000224887	0.000389756		0.00601409
GO:0007218	neuropeptide signaling pathway	signal transduction	0.000696644	0.000385589	0.000329372	0.000223153	0.000321469	0.000242236	0.000494258	0.00130679	0.000476452	0.000264346	0.000291117	0.000278253	0.00011167	0.000535851		0.0059572
GO:0018149	peptide cross-linking	macromolecular turnover	0.000363378	0.000377481	0.000225279	0.00158905	0.00045481	0.000384542	0.000466836	0.000195031	0.000302771	0.000479962	0.000222564	0.000426728	0.000135184	0.00030084		0.00592446
GO:0008360	regulation of cell shape	regulation of cell proliferation	0.000624422	0.000287414	0.000475866	0.000403307	0.000407108	0.00026842	0.000708143	0.000363879	0.000651315	0.000279068	0.000115381	0.000445171	0.000369742	0.000488515		0.00588775
GO:0009790	embryonic development	development	0.000258521	0.000411789	0.000451688	0.000434517	0.000231497	0.000445874	0.000223379	0.000257445	0.00038057	0.00195489	0.000229628	0.000175325	0.000135952	0.000263751		0.00585483
GO:0006493	protein amino acid O-linked glycosylation	macromolecular turnover	0.000615043	0.000254238	0.0003309	0.000350275	0.000641667	0.000402061	0.00058343	0.00029321	0.000638303	0.00041655	0.000232131	0.000429147	0.000366297	0.000300682		0.00585393
GO:0006626	protein targeting to mitochondrion	macromolecular turnover	0.000359026	0.000343923	0.000528749	0.000456443	0.000919083	0.00064436	0.000321538	0.000364962	0.000318708	0.000490362	0.000214446	0.000243301	0.000331004	0.000315643		0.00585155
GO:0006665	sphingolipid metabolic process	metabolic process	0.000559454	0.000282161	0.000222178	0.000383397	0.000419445	0.000213179	0.000532868	0.00101834	0.000336044	0.000575822	0.000173773	0.000367412	0.000455939	0.000307889		0.0058479
GO:0007219	Notch signaling pathway	signal transduction	0.000368565	0.000312736	0.000402941	0.000732745	0.000466111	0.000428199	0.000483549	0.000859649	0.00045494	0.000250587	0.000137216	0.000347104	0.000197836	0.000372		0.00581418
GO:0000187	activation of MAPK activity	signal transduction	0.00058014	0.000149888	0.000118494	0.000214504	0.000549484	0.000149793	0.000682899	0.00123006	0.000351308	0.000200283	0.000180587	0.000584881	0.000204469	0.000598713		0.0057955
GO:0008366	axon ensheathment	development	1.93126e-05	8.1476e-06	5.9422e-06	1.28223e-05	7.80478e-05	6.46389e-06	4.91032e-05	0.00538217	3.957e-05	1.00744e-05	3.52745e-06	4.0646e-05	3.755e-05	8.44111e-05		0.00577779
GO:0007265	Ras protein signal transduction	signal transduction	0.000606084	0.000383615	0.000387192	0.000335697	0.000477392	0.000381424	0.000540037	0.000453015	0.000475427	0.00032062	9.17953e-05	0.000673561	0.000250103	0.0003807		0.00575666
GO:0006641	triacylglycerol metabolic process	metabolic process	0.000668503	6.75497e-05	4.29552e-05	0.000320695	0.000127204	7.10597e-05	0.000176034	4.29578e-05	0.00015806	0.000106952	0.0035435	0.000107823	0.000101233	0.000194807		0.00572933
GO:0007004	telomere maintenance via telomerase	macromolecular turnover	0.000433894	0.000312137	0.000580796	0.000755768	0.000286788	0.00083162	0.000563665	0.000582688	0.000279099	0.000178039	9.20232e-05	0.00023881	0.000258354	0.000333601		0.00572728
GO:0006812	cation transport	transport	0.000354491	0.000399684	0.000302645	0.000380659	0.000384065	0.000403896	0.000238062	0.000970274	0.000244075	0.000455192	0.000336233	0.000257634	0.000487071	0.000434329		0.00564831
GO:0030097	hemopoiesis	development	0.000667296	0.000236913	0.000479384	0.000222781	0.000294349	0.000451468	0.000407321	0.000408836	0.000933917	0.000574962	6.1149e-05	0.000286788	9.76155e-05	0.000468713		0.00559149
GO:0006635	fatty acid beta-oxidation	metabolic process	0.000582585	0.000382648	0.000391871	0.000268472	0.000252108	0.000324218	0.000423402	0.000154071	0.000302413	0.00111612	0.000379521	0.000219814	0.000473079	0.000236799		0.00550712
GO:0007586	digestion	metabolic process	0.000290446	0.000618757	0.000957558	6.28044e-05	2.98184e-05	0.000436797	0.000105985	3.38923e-05	0.00194631	9.82103e-05	0.00073974	5.27658e-05	5.99063e-05	4.93682e-05		0.00548236
GO:0007565	female pregnancy	development	0.000602316	0.000108351	7.91054e-05	0.000127521	7.015e-05	0.000109975	0.000841852	7.89941e-05	0.000251109	0.000137242	0.00260665	0.000183403	0.00012158	0.000160956		0.0054792
GO:0043065	positive regulation of apoptosis	regulation of cell proliferation	0.00039208	0.000473793	0.000446314	0.00052939	0.000287292	0.00040484	0.000527698	0.000301635	0.00046392	0.000248982	0.000348312	0.00035812	0.000252011	0.000424022		0.00545841
GO:0006611	protein export from nucleus	macromolecular turnover	0.000239003	0.000434951	0.000363906	0.000260046	0.000638905	0.000634235	0.000336487	0.000318576	0.000364035	0.000233726	0.000638414	0.000305725	0.000226738	0.000415996		0.00541074
GO:0051056	regulation of small GTPase mediated signal transduction	signal transduction	0.000334973	0.000365245	0.000548091	0.000322539	0.000377561	0.000494355	0.000361618	0.000732898	0.00032961	0.000351773	8.83747e-05	0.000488318	0.000243315	0.000345047		0.00538372
GO:0006887	exocytosis	cytoskeleton	0.000234787	0.000441604	0.000799291	0.000402689	0.000479508	0.000521537	0.000237668	0.00079941	0.000195436	0.000304918	8.87078e-05	0.000266313	0.000205843	0.000335404		0.00531312
GO:0045862	positive regulation of proteolysis	macromolecular turnover	0.000434215	0.000386679	0.000479711	0.000249137	0.000686269	0.000482167	0.000382227	0.000197087	0.00030909	0.000312325	0.000211208	0.00033201	0.000269849	0.000574272		0.00530625
GO:0043161	proteasomal ubiquitin-dependent protein catabolic process	macromolecular turnover	0.000336896	0.000524329	0.000584098	0.000374474	0.00047669	0.000425922	0.000343528	0.000369143	0.000369566	0.000305579	0.000167404	0.00030327	0.000382489	0.000335556		0.00529894
GO:0016525	negative regulation of angiogenesis	development	0.000759398	4.65935e-05	1.32776e-05	6.72968e-05	0.000138884	4.90311e-05	0.000933509	5.40496e-05	0.000505472	0.00133988	0.000320692	0.000442218	0.000162246	0.000445979		0.00527853
GO:0005978	glycogen biosynthetic process	metabolic process	0.000505646	0.00025137	0.000267352	0.000301367	0.000314099	0.000242063	0.000388731	0.000626441	0.000201744	0.000652323	8.10418e-05	0.000166893	0.000930935	0.000255946		0.00518595
GO:0006835	dicarboxylic acid transport	transport	0.000316824	0.000376222	0.000301406	0.000489598	0.000293133	0.000373255	0.000464446	0.00116373	0.000301053	0.000143943	0.000116372	0.000274154	0.000306031	0.000262892		0.00518306
GO:0006606	protein import into nucleus	macromolecular turnover	0.000300506	0.000516256	0.000354163	0.00031321	0.000516653	0.000512226	0.000313639	0.000430007	0.000314479	0.000458689	0.000162965	0.000252775	0.000290694	0.000443742		0.00518
GO:0006098	pentose-phosphate shunt	metabolic process	0.000514	0.000431894	0.000473296	0.000402373	0.000470116	0.000453768	0.00052306	0.000316852	0.000277904	0.000239151	0.000314477	0.000220892	0.000222869	0.000311233		0.00517188
GO:0008652	amino acid biosynthetic process	macromolecular turnover	0.000296724	0.000883268	0.000390549	0.000507073	0.00043011	0.000535738	0.00035008	0.000274787	0.00016961	0.000104118	0.000716756	0.000127182	8.92331e-05	0.000261228		0.00513646
GO:0006471	protein amino acid ADP-ribosylation	macromolecular turnover	0.000238336	0.000393481	0.000364573	0.000214584	0.000362183	0.000332152	0.000217567	0.000315423	0.000162428	0.00135871	8.69205e-05	0.000234838	0.0004386	0.000361799		0.00508159
GO:0006338	chromatin remodeling	macromolecular turnover	0.000271089	0.000641945	0.000505012	0.000279895	0.000483658	0.000553043	0.000267689	0.000359485	0.000240018	0.000292914	9.87545e-05	0.000269589	0.000348225	0.000464535		0.00507585
GO:0017157	regulation of exocytosis	cytoskeleton	0.000305258	0.000392226	0.00046758	0.000142504	0.000150905	0.000306111	0.000300026	0.00150957	0.000226762	0.000310901	0.000230958	0.000171777	0.000247858	0.000267977		0.00503041
GO:0006183	GTP biosynthetic process	metabolic process	0.00040439	0.000491195	0.000804443	0.000409652	0.0004247	0.000570375	0.000294712	0.000211927	0.000312867	0.000175721	0.000150428	0.000318507	0.000117418	0.00032026		0.0050066
GO:0042062	long-term strengthening of neuromuscular junction	signal transduction	0.000386206	0.000534039	0.000189294	0.00046398	0.000456511	0.000279904	0.000439826	0.00017635	0.000465004	0.000176664	0.000136156	0.000434286	0.00049372	0.000368047		0.00499999
GO:0030182	neuron differentiation	development	0.000270015	0.000225647	0.000459681	0.00027173	0.000554781	0.000450203	0.000234515	0.00146271	0.000238398	0.000146039	9.32467e-05	0.000186445	0.000124217	0.000271867		0.00498949
GO:0006367	transcription initiation from RNA polymerase II promoter	macromolecular turnover	0.000290466	0.000539081	0.000596987	0.000314322	0.000511364	0.000405342	0.000331036	0.000295952	0.00028523	0.000187872	0.000162159	0.000244271	0.000252027	0.000547678		0.00496379
GO:0030212	hyaluronan metabolic process	metabolic process	0.000604417	0	1.82013e-06	0	0.000106585	1.83143e-06	0.000223798	1.98394e-05	0.000126562	2.89462e-05	0.00365796	5.15583e-05	6.90225e-05	7.11565e-05		0.0049635
GO:0008624	induction of apoptosis by extracellular signals	regulation of cell proliferation	0.000317874	0.000582398	0.000465524	0.000266812	0.000554797	0.000450436	0.000257992	0.000259622	0.000260552	0.000363501	0.000247435	0.000309967	0.000214362	0.000365454		0.00491673
GO:0006352	transcription initiation	macromolecular turnover	0.000323228	0.000431525	0.000484834	0.000316185	0.000595077	0.000383345	0.000284349	0.000344488	0.000290727	0.000214438	0.000139889	0.000258101	0.00026469	0.000577853		0.00490873
GO:0015904	tetracycline transport	transport	0.000337343	0.000427194	0.000501811	0.000238	0.000491414	0.000712306	0.000638067	0.000256259	0.000314525	0.000177054	0.00013929	0.000301345	9.47214e-05	0.000269969		0.0048993
GO:0008610	lipid biosynthetic process	metabolic process	0.00103807	0.000450639	0.000442293	0.000228028	0.000289302	0.00054882	0.000348131	0.00033479	0.000160595	0.000142663	0.000365448	0.000201852	0.000111131	0.000215294		0.00487706
GO:0032012	regulation of ARF protein signal transduction	signal transduction	0.000299137	0.000489344	0.000416204	0.000225709	0.000217822	0.000307071	0.000322228	0.000991143	0.000234688	0.000241907	8.6039e-05	0.000350124	0.000205765	0.000449441		0.00483662
GO:0006805	xenobiotic metabolic process	metabolic process	0.000693482	0.000320147	0.000181407	7.49788e-05	0.000303682	0.000272884	0.000333833	0.000236502	0.000339802	0.000103173	0.00125421	0.000266452	0.000130448	0.000309926		0.00482093
GO:0007040	lysosome organization and biogenesis	cytoskeleton	0.000487261	0.000290104	0.00018108	0.000361918	0.000451064	0.000219083	0.000497971	0.000466959	0.000281063	0.000434529	0.000175552	0.000330753	0.000331171	0.000300299		0.00480881
GO:0006270	DNA replication initiation	macromolecular turnover	0.000243715	0.00037121	0.000478665	0.000253503	0.00061309	0.000409025	0.000293691	0.000329299	0.000292284	0.000189642	0.000125713	0.000211536	0.000448466	0.000523886		0.00478372
GO:0030301	cholesterol transport	transport	0.000433885	7.23234e-05	3.81188e-05	0.000350896	0.000146536	4.20968e-05	0.000176093	4.78448e-05	0.000121548	0.000124675	0.00287645	5.42301e-05	3.43159e-05	0.000258327		0.00477734
GO:0009636	response to toxin	metabolic process	0.00114761	0.000308245	0.000167307	0.000128094	0.000205169	0.000221029	0.000375205	0.00016762	0.000326427	9.48012e-05	0.000998376	0.000202791	0.000143506	0.000290424		0.0047766
GO:0001570	vasculogenesis	development	0.000330643	0.000129331	0.000347841	0.000196633	0.000107572	0.000184875	0.000683289	0.000114594	0.000468149	0.0012683	7.89172e-05	0.000427546	0.000119842	0.000315904		0.00477344
GO:0042127	regulation of cell proliferation	regulation of cell proliferation	0.000478962	0.000378964	0.000428195	0.000530379	0.000427772	0.000375447	0.000326796	0.000312134	0.000282299	0.000182715	0.000134778	0.000325197	0.000218112	0.000330733		0.00473248
GO:0000910	cytokinesis	cytoskeleton	0.000194969	0.000282763	0.000380395	0.000233577	0.000455363	0.000468296	0.000249515	0.00127544	0.000225306	0.000307408	5.54722e-05	0.000155777	9.59803e-05	0.000324355		0.00470462
GO:0006644	phospholipid metabolic process	metabolic process	0.000655066	0.000305718	0.000232038	0.000374087	0.000221468	0.000312492	0.000527423	0.000299595	0.000225744	0.000194771	0.000160103	0.000247686	0.000257504	0.000673711		0.00468741
GO:0043410	positive regulation of MAPKKK cascade	signal transduction	0.000419021	0.000148462	0.000126954	0.000180877	0.000174681	0.00024442	0.000606725	0.000420864	0.000682041	0.000283948	0.000372439	0.00028833	0.000282276	0.000322675		0.00455371
GO:0007015	actin filament organization	cytoskeleton	0.00026148	0.000223752	0.000347608	0.000277047	0.000266244	0.000185508	0.000173365	0.000272223	0.00029613	0.000205408	5.7758e-05	0.000233255	0.00132655	0.000317734		0.00444406
GO:0006310	DNA recombination	macromolecular turnover	0.000191715	0.000440169	0.000563358	0.000274668	0.00064891	0.000515703	0.000202337	0.000261811	0.000204086	0.000179372	9.27109e-05	0.000203482	0.000220662	0.000407063		0.00440605
GO:0006402	mRNA catabolic process	macromolecular turnover	0.000441028	0.000186614	0.000391632	0.000304167	0.000149092	0.000230456	0.000779323	0.000141356	0.000535316	0.0001244	6.34429e-05	0.000434539	0.000223346	0.000394705		0.00439942
GO:0007338	single fertilization	development	0.000334149	0.000122948	8.09093e-05	0.000378041	0.000265616	0.000137663	0.000427689	0.000154995	0.00052263	0.000423166	5.9532e-05	0.000451339	0.000296493	0.000727594		0.00438276
GO:0051017	actin filament bundle formation	cytoskeleton	0.000452295	0.000315724	0.000298138	0.000668239	0.000456212	0.000210284	0.000397509	0.000453212	0.000341027	0.000128742	5.98797e-05	0.000268228	6.29078e-05	0.00024327		0.00435567
GO:0006584	catecholamine metabolic process	metabolic process	0.000401102	0.000173067	0.000456247	0.000402335	0.000358244	0.000219772	0.00040857	0.000293871	0.000308073	0.000157826	0.000260942	0.000272551	0.00034381	0.000292958		0.00434937
GO:0007162	negative regulation of cell adhesion	cytoskeleton	0.000321777	0.000229648	0.000588475	0.000269308	0.000406887	0.000258132	0.000484257	0.000414425	0.000263794	0.000147609	0.00020388	0.000316563	0.000103059	0.000209863		0.00421768
GO:0030324	lung development	development	0.000398384	0.000221735	0.000224386	0.000237682	0.000161182	0.000609199	0.000448268	0.000188281	0.000436113	0.000247134	0.000144418	0.000238296	9.42146e-05	0.000490165		0.00413946
GO:0009103	lipopolysaccharide biosynthetic process	macromolecular turnover	0.000240784	0.000294436	0.000299412	0.000302234	0.00060377	0.000460301	0.00043171	0.000284778	0.00028113	0.000129913	0.000124061	0.000287783	0.000115689	0.000275655		0.00413166
GO:0030833	regulation of actin filament polymerization	cytoskeleton	0.00022856	0.000300877	0.000328747	0.000530881	0.000477961	0.000478645	0.000282528	0.000226872	0.000242931	0.000189184	9.34045e-05	0.000331186	0.000147552	0.000271474		0.0041308
GO:0000184	mRNA catabolic process, nonsense-mediated decay	macromolecular turnover	0.000215925	0.000433703	0.000382358	0.0002353	0.000459415	0.000496301	0.000209929	0.000285144	0.000212486	0.000180234	0.000175629	0.000202541	0.000268133	0.000363749		0.00412085
GO:0007588	excretion	cytoskeleton	0.000417751	0.000120041	0.000143898	0.000180617	0.000166574	0.000126261	0.0006282	0.000181672	0.000585906	0.00016672	0.000237574	0.000330891	0.000136021	0.000692468		0.00411459
GO:0006401	RNA catabolic process	macromolecular turnover	0.000198708	0.000347185	0.000584445	0.000271895	0.000505729	0.000426541	0.000240549	0.000180704	0.000170344	0.000169818	8.85593e-05	0.000246839	0.00037971	0.000284231		0.00409526
GO:0030001	metal ion transport	transport	0.000254553	0.000466858	0.000386728	0.000241394	0.000430287	0.000521908	0.000267775	0.000280576	0.000191142	0.00013916	0.000183738	0.00022356	9.91927e-05	0.000376739		0.00406361
GO:0051085	chaperone cofactor-dependent protein folding	macromolecular turnover	0.000228467	0.000225079	0.000188758	0.000234192	0.000293751	0.00025805	0.000142785	0.000221712	0.00070401	6.06134e-05	8.50232e-05	0.00088874	6.90394e-05	0.000452838		0.00405306
GO:0008584	male gonad development	development	0.000221492	0.000572615	0.000253337	0.000189722	0.000240154	0.000234031	0.000168604	0.000236933	0.000213757	0.000275166	6.91312e-05	0.000149105	0.000506059	0.000720823		0.00405093
GO:0006465	signal peptide processing	signal transduction	0.000236484	0.000208455	0.000123769	0.000202134	0.00040773	0.000249075	0.000310486	0.000492678	0.000214836	0.000233637	0.000501894	0.00027464	0.000291283	0.000297702		0.0040448
GO:0043010	camera-type eye development	development	0.000505121	0.000149905	8.07245e-05	0.000115847	8.60028e-05	0.000111501	0.000234062	0.000644687	0.000420112	0.000801851	4.20606e-05	0.000140278	0.000370795	0.000335426		0.00403837
GO:0007204	elevation of cytosolic calcium ion concentration	signal transduction	0.000449668	9.04358e-05	0.000100003	0.000222997	8.03919e-05	0.00012719	0.000130284	0.000160191	0.000148029	0.000134787	0.00214287	0.000100514	5.18082e-05	9.51598e-05		0.00403433
GO:0006783	heme biosynthetic process	metabolic process	0.000292995	0.000285312	0.000251785	0.000289866	0.000414074	0.000351635	0.000217236	0.000257912	0.000168579	0.000399733	0.000289668	0.000149957	0.00038505	0.000275807		0.00402961
GO:0006164	purine nucleotide biosynthetic process	macromolecular turnover	0.000162731	0.000310688	0.000335555	0.000266498	0.000383984	0.000329898	0.00015306	0.000199959	0.000146744	0.000210106	9.7306e-05	0.000105367	0.00110603	0.000200415		0.00400834
GO:0006265	DNA topological change	macromolecular turnover	0.000239617	0.000338781	0.000516979	0.000387146	0.00041805	0.000430082	0.0002028	0.000290399	0.000189275	0.000151072	0.000136793	0.000165121	0.000199167	0.000315582		0.00398086
GO:0048168	regulation of neuronal synaptic plasticity	signal transduction	0.000165785	0.000113098	0.000156494	0.000108057	0.000521358	0.000252157	0.000202677	0.000993446	0.00017173	4.78991e-05	0.000662817	0.000283883	5.78247e-05	0.000200657		0.00393788
GO:0007257	activation of JNK activity	signal transduction	0.000339425	0.000271737	0.000340281	0.000208009	0.000473917	0.000264038	0.000485821	0.000209759	0.000318447	0.000180763	7.6131e-05	0.000326718	0.000154971	0.000280461		0.00393048
GO:0008543	fibroblast growth factor receptor signaling pathway	signal transduction	0.000260612	0.000380432	0.000416499	0.000207518	0.000413646	0.000442002	0.000296461	0.000387065	0.000178241	0.000142778	8.86069e-05	0.000187002	0.000131166	0.000395533		0.00392756
GO:0019221	cytokine and chemokine mediated signaling pathway	immune response	0.000359007	0.000270682	0.000283339	0.000252199	0.00030852	0.000284465	0.000410041	0.000285284	0.000231929	0.000175192	0.000143989	0.000275282	0.000263682	0.000259139		0.00380275
GO:0007409	axonogenesis	development	0.000173502	0.00013003	0.000144553	0.00011768	0.00061896	0.000122501	0.000168113	0.00147784	0.00025087	8.29791e-05	3.94563e-05	0.000115929	9.24858e-05	0.000242426		0.00377733
GO:0000079	regulation of cyclin-dependent protein kinase activity	regulation of cell proliferation	0.000206112	0.000417254	0.000340607	0.00027175	0.000627083	0.000348489	0.000249224	0.000174628	0.000249513	0.000134834	6.83377e-05	0.000176207	0.000193626	0.000310583		0.00376825
GO:0007030	Golgi organization and biogenesis	macromolecular turnover	0.000255403	0.000234332	0.000261857	0.00019908	0.000261175	0.000292175	0.000255262	0.000333302	0.000218912	0.000231983	0.000100379	0.000223251	0.000637698	0.000261758		0.00376657
GO:0000188	inactivation of MAPK activity	signal transduction	0.00054317	0.000197894	0.000311124	0.000410456	0.000341347	0.00024942	0.000233616	0.000223748	0.000195912	0.000205853	5.81322e-05	0.00016591	0.000314798	0.000282441		0.00373382
GO:0019079	viral genome replication	macromolecular turnover	0.000244968	0.000295265	0.000291828	0.00030436	0.000557993	0.000310428	0.000239607	0.000202702	0.000243689	0.000200397	0.000139217	0.000220543	0.000242814	0.00023683		0.00373064
GO:0001937	negative regulation of endothelial cell proliferation	regulation of cell proliferation	0.000508099	0.000251761	0.000224125	0.000520494	0.00021045	0.000312576	0.000151557	0.000194024	0.000211063	0.000446002	7.26568e-05	0.000110714	0.000204044	0.000286855		0.00370442
GO:0006891	intra-Golgi vesicle-mediated transport	transport	0.000255157	0.000420938	0.000499514	0.000219945	0.000344208	0.000437975	0.000214385	0.000260262	0.000147655	0.000156388	0.00013441	0.000201544	0.000147806	0.000262862		0.00370305
GO:0006959	humoral immune response	immune response	0.000368763	0.000249225	0.000267186	0.000207434	0.000403078	0.000225955	0.000320642	0.000256412	0.000241842	0.000204305	0.000202257	0.000335703	0.000136647	0.000273175		0.00369262
GO:0006904	vesicle docking during exocytosis	cytoskeleton	0.000198585	0.000404856	0.000309119	0.000409253	0.000130736	0.000426663	0.000191334	0.000499374	0.000178072	0.000158584	0.00017034	0.000300689	8.91215e-05	0.000216206		0.00368293
GO:0000082	G1/S transition of mitotic cell cycle	regulation of cell proliferation	0.000234357	0.000344809	0.000408004	0.000215068	0.000324178	0.000340183	0.000170659	0.000305384	0.000202619	0.000165343	8.23077e-05	0.000140423	0.000264009	0.000441844		0.00363919
GO:0007512	adult heart development	heart development	8.72523e-05	5.34323e-06	4.0603e-06	4.14732e-06	2.63534e-06	4.70186e-06	4.32042e-06	7.20132e-06	2.8293e-06	0.00304605	2.70334e-06	5.15194e-06	0.000391056	5.20984e-05		0.00361955
GO:0031175	neurite development	development	0.000203102	0.000193745	0.000567211	3.40932e-05	3.43494e-05	0.000773732	0.000378208	0.000659996	0.000188927	7.67193e-05	5.50197e-05	0.000145512	7.24198e-05	0.000220687		0.00360372
GO:0045429	positive regulation of nitric oxide biosynthetic process	signal transduction	0.000465258	0.000147336	0.000261309	0.000109953	0.000211426	0.000216103	0.000233637	0.000291773	0.000844816	0.000123113	4.65379e-05	0.000181956	0.000145377	0.000308296		0.00358689
GO:0006368	RNA elongation from RNA polymerase II promoter	macromolecular turnover	0.000205096	0.000299108	0.00031282	0.000350081	0.000230405	0.000318151	0.000233624	0.000184878	0.000208773	0.000156723	0.000115544	0.0001939	0.00025903	0.000439893		0.00350803
GO:0006406	mRNA export from nucleus	macromolecular turnover	0.000180219	0.000428687	0.000421361	0.000186751	0.000356637	0.000395102	0.000182631	0.000202114	0.000161694	0.000128811	7.69137e-05	0.000237741	0.000168693	0.000345404		0.00347276
GO:0046777	protein amino acid autophosphorylation	signal transduction	0.000257973	0.000342946	0.000347102	0.000227525	0.000311143	0.000305832	0.000295485	0.000353006	0.00018786	0.000181201	8.61422e-05	0.00023338	0.000154184	0.000185756		0.00346954
GO:0007398	ectoderm development	development	2.19746e-05	2.18068e-05	2.1146e-05	0.00319946	2.56302e-05	3.65052e-05	1.69113e-05	2.61801e-05	1.18722e-05	1.36586e-05	7.09832e-06	1.28563e-05	8.53901e-06	2.81782e-05		0.00345182
GO:0019885	antigen processing and presentation of endogenous peptide antigen via MHC class I	immune response	0.000429511	0.000330514	0.000325349	0.000175949	0.000256946	0.000247549	0.000443021	0.000163055	0.000286536	8.40818e-05	0.000112003	0.000325862	0.000112867	0.000151664		0.00344491
GO:0006944	membrane fusion	cytoskeleton	0.000223603	0.000196464	0.000192276	0.000134355	0.000157201	0.000240319	0.000211163	0.000898926	0.000204696	0.00020861	0.000101173	0.000139405	0.000236828	0.000263149		0.00340817
GO:0031424	keratinization	development	0.000141496	0.000244514	0.00035666	0.000781204	0.000353108	0.000370778	0.000145745	0.00012069	9.87322e-05	0.000129569	2.86797e-05	0.000101961	0.000386352	0.000137469		0.00339696
GO:0051289	protein homotetramerization	macromolecular turnover	0.000108517	0.000296878	0.000288289	0.000264584	0.000191176	0.000363387	0.000109741	0.000220093	0.000240183	0.000421787	0.000247905	0.000115501	0.000233548	0.000271398		0.00337299
GO:0006325	establishment and/or maintenance of chromatin architecture	macromolecular turnover	0.000496924	0.000218177	0.000230955	0.00011395	0.00014881	0.000255638	0.000436718	0.000234215	0.000190404	0.000116187	7.31476e-05	0.000179303	0.000260824	0.000387864		0.00334312
GO:0006510	ATP-dependent proteolysis	macromolecular turnover	0.000117628	0.00117387	0.000203248	0.000131793	0.000304105	0.000169408	0.000114144	0.000221127	9.09329e-05	0.00019711	0.000127755	9.77248e-05	0.00017082	0.000184125		0.00330379
GO:0015804	neutral amino acid transport	transport	0.000214371	0.000771726	0.000265194	0.000717478	0.000182379	0.000242116	0.000188226	0.000115482	8.24954e-05	5.27234e-05	0.000104072	8.8323e-05	9.93663e-05	0.000112208		0.00323616
GO:0006796	phosphate metabolic process	metabolic process	0.000146383	0.000293275	0.000293683	0.000177917	0.000318335	0.000299073	0.000163482	0.000389584	0.000175885	0.000205183	8.80875e-05	0.000221349	0.000235408	0.000193856		0.0032015
GO:0007254	JNK cascade	signal transduction	0.000172303	0.000185489	0.000300974	0.000179452	0.000327211	0.00028063	0.000241239	0.000335874	0.000234616	0.000116978	6.21279e-05	0.000178629	0.000286743	0.000258942		0.00316121
GO:0006108	malate metabolic process	metabolic process	0.000148954	0.000226149	0.000307299	0.000155175	0.000228396	0.000334847	0.00011518	0.000254606	0.000118053	0.000565829	0.000148613	7.27882e-05	0.000337081	0.000138664		0.00315163
GO:0008277	regulation of G-protein coupled receptor protein signaling pathway	G-protein coupled receptor protein signaling pathway	0.000245964	0.000311134	0.000141728	0.000115406	0.000161781	0.000122706	0.000362233	0.000331649	0.00029186	0.00024432	5.21014e-05	0.000347305	0.000122417	0.000287413		0.00313802
GO:0006890	retrograde vesicle-mediated transport, Golgi to ER	transport	0.000179237	0.00025705	0.000186295	0.000174428	0.000314764	0.000315199	0.000191403	0.000288522	0.000172507	0.000159992	0.000208356	0.000162656	0.000201263	0.000324331		0.003136
GO:0015074	DNA integration	macromolecular turnover	0.000153868	0.000589286	0.000274385	0.000137107	0.000292791	0.000354383	0.000102315	0.000189714	8.34881e-05	0.000265168	0.000238889	0.000108424	0.000142929	0.000192715		0.00312546
GO:0006914	autophagy	cytoskeleton	0.000166706	0.000237318	0.000152891	0.0001762	0.000343906	0.000428312	0.000240618	0.000171032	0.000121598	0.000237359	9.7902e-05	0.000170547	0.000374458	0.000203617		0.00312246
GO:0030300	regulation of cholesterol absorption	metabolic process	0.000107698	0	0	0	3.17217e-07	0	3.45368e-06	6.19981e-07	2.65886e-07	4.85308e-05	0.00277899	2.24655e-07	3.25578e-07	0.000179006		0.00311943
GO:0007016	cytoskeletal anchoring	cytoskeleton	0.000208352	0.000180477	0.00024766	0.000528948	0.000384044	0.000284971	0.000185532	0.000205503	0.000172365	0.000122263	2.48557e-05	8.90307e-05	0.000363171	0.00011531		0.00311248
GO:0006378	mRNA polyadenylation	macromolecular turnover	0.000107247	0.000438806	0.000431554	0.000223236	0.000244849	0.000275081	0.000125783	0.000489289	0.000141841	9.92441e-05	5.12758e-05	0.000155787	9.52857e-05	0.000230742		0.00311002
GO:0016485	protein processing	macromolecular turnover	0.000248437	0.000245529	0.000242654	0.000221979	0.000298735	0.000292599	0.000277622	0.000187996	0.000174535	0.000157573	0.000108765	0.000180507	0.000136027	0.000283534		0.00305649
GO:0045785	positive regulation of cell adhesion	cytoskeleton	0.000369995	1.25792e-05	7.43222e-06	0.000110632	1.55436e-05	1.50439e-05	0.000106706	2.44745e-05	4.62134e-05	0.000169444	0.00203055	7.72411e-05	2.69144e-05	3.95857e-05		0.00305236
GO:0045597	positive regulation of cell differentiation	regulation of cell proliferation	0.000297017	9.4954e-05	8.50446e-05	2.85389e-05	1.32358e-05	0.000198295	8.04341e-05	0.000759944	0.000278691	2.73628e-05	0.000363348	0.000270506	1.87008e-05	0.000514413		0.00303048
GO:0015813	L-glutamate transport	transport	0.000290599	6.96693e-05	0.000108298	0.000183891	0.000351476	0.000116296	0.000174791	0.0005188	0.000200371	0.000346321	6.63543e-05	0.000253343	0.000184147	0.000152713		0.00301707
GO:0030048	actin filament-based movement	cytoskeleton	0.000129584	0.000146849	0.000131761	0.00012633	0.000131844	6.67789e-05	0.000199607	8.31231e-05	0.000114146	0.00135404	2.37259e-05	0.00016579	0.000256517	8.65326e-05		0.00301663
GO:0030900	forebrain development	development	0.000196957	0.000248913	0.000265675	0.000178724	0.000170033	0.000314704	0.000274852	0.000580017	0.00015779	0.000109097	5.29104e-05	0.000164795	6.90762e-05	0.000226617		0.00301016
GO:0006306	DNA methylation	macromolecular turnover	0.000508709	0.000348283	0.000210442	0.000151139	0.000269296	0.000132378	0.00047872	9.32924e-05	0.000179004	6.13482e-05	3.40493e-05	0.000201106	8.34781e-05	0.000255546		0.00300679
GO:0043433	negative regulation of transcription factor activity	macromolecular turnover	0.000217511	0.000237851	0.000243589	0.000225998	0.000209487	7.19254e-05	0.000310048	8.8062e-05	0.000676093	5.86066e-05	5.8435e-05	0.000238772	7.21965e-05	0.000298151		0.00300673
GO:0008299	isoprenoid biosynthetic process	metabolic process	0.000110441	0.00020276	0.000380651	0.000242483	0.000145285	0.000375078	0.000104923	0.000248158	9.86258e-05	0.000166716	0.000129015	0.000114001	0.000513024	0.00017555		0.00300671
GO:0030100	regulation of endocytosis	cytoskeleton	0.000183067	0.000197922	0.000222334	0.00018057	0.000336821	0.000319258	0.000200753	0.00026018	0.000156399	8.19404e-05	6.97375e-05	0.000142389	0.000476571	0.000172498		0.00300044
GO:0050729	positive regulation of inflammatory response	inflammatory response	0.000629594	1.74927e-05	1.57538e-05	2.1617e-05	2.42815e-05	7.14537e-06	0.00138089	3.89461e-05	0.000268496	0.000254407	6.55366e-05	0.000144378	6.00592e-05	6.0852e-05		0.00298945
GO:0006376	mRNA splice site selection	macromolecular turnover	0.000137091	0.000397802	0.000493776	0.000206655	0.000279659	0.000441149	0.000139953	0.000156353	0.000115354	0.000108775	9.58472e-05	0.000158646	7.67557e-05	0.000174768		0.00298258
GO:0006479	protein amino acid methylation	signal transduction	0.000179605	0.000322248	0.000229337	0.000215661	0.000352238	0.00019865	0.000163981	0.000278744	0.000194061	0.000180983	5.32747e-05	0.000176174	0.000211235	0.000222105		0.0029783
GO:0007052	mitotic spindle organization and biogenesis	regulation of cell proliferation	0.000170432	0.000153251	0.000244667	0.000143185	0.000372781	0.000247436	0.000239738	0.000417139	0.00019453	9.05799e-05	5.55798e-05	0.000212931	0.000241353	0.000173182		0.00295678
GO:0019915	sequestering of lipid	metabolic process	0.000520011	7.10749e-05	2.00708e-05	0.00039911	0.000151156	5.19134e-05	0.000487847	3.73039e-05	0.000442596	0.000152332	0.0001044	9.64686e-05	0.000286033	0.000106765		0.00292708
GO:0043193	positive regulation of gene-specific transcription	macromolecular turnover	0.000114513	0.000401388	0.000403593	0.000179248	0.000320782	0.000308466	0.000154157	0.000129074	0.000187817	0.000100081	7.40271e-05	0.000145697	0.000202695	0.000197179		0.00291872
GO:0009116	nucleoside metabolic process	metabolic process	0.000208536	0.00022372	0.000376828	0.000192181	0.00038582	0.000263635	0.000146557	0.000182623	0.000162687	8.92212e-05	8.94719e-05	0.000123015	4.8446e-05	0.000423155		0.0029159
GO:0007595	lactation	other	0.000335273	0.000239704	0.000247493	0.000186622	0.000248825	0.000175297	0.000210816	0.000166155	0.000198809	0.000208161	0.000109331	0.000216925	0.000183227	0.00016878		0.00289542
GO:0007031	peroxisome organization and biogenesis	cytoskeleton	0.000195268	0.000238313	0.000192206	0.000162634	0.000432092	0.000321783	0.000201453	0.000233361	0.000173889	0.000103931	0.000141573	0.000142206	0.00012767	0.000216966		0.00288334
GO:0009725	response to hormone stimulus	other	0.000189719	0.000111648	0.000146579	0.000117683	0.000108766	0.000510751	0.000153034	6.56766e-05	0.000255074	0.000140553	0.000590732	0.000165363	4.71882e-05	0.000270218		0.00287298
GO:0007528	neuromuscular junction development	muscle contraction	0.000176647	7.10516e-05	0.00010031	0.000119103	0.000675919	0.000151297	0.000160366	0.000230123	0.000169791	0.000268039	2.71226e-05	0.00011171	0.000416569	0.000179578		0.00285763
GO:0016051	carbohydrate biosynthetic process	metabolic process	0.00028071	0.000244838	0.000186018	8.34816e-05	0.000289133	0.000362014	0.000261582	0.000142182	0.000189594	0.000154793	9.33393e-05	0.000117539	0.00024822	0.000200637		0.00285408
GO:0031018	endocrine pancreas development	development	0.000294916	5.05458e-05	3.76378e-05	1.08079e-05	3.51658e-06	0.000171305	8.09493e-05	0.000739992	0.000272809	2.54018e-05	0.00037044	0.000263315	1.60649e-05	0.000505152		0.00284285
GO:0030968	unfolded protein response	macromolecular turnover	0.000203815	0.000331245	0.000589169	0.000146236	0.000192016	0.000207667	9.16015e-05	0.000115789	8.85931e-05	0.000117449	9.37428e-05	0.000356474	0.000130547	0.000143955		0.0028083
GO:0009952	anterior/posterior pattern formation	development	0.000147844	0.000259744	0.000602078	0.000134611	0.000188237	0.000244857	0.000176632	0.000177442	0.000148268	0.000134627	4.73776e-05	0.000163079	0.000132757	0.000201564		0.00275912
GO:0007566	embryo implantation	development	0.00019165	0.000201918	0.000204263	0.000196906	0.000159176	0.000528219	0.000176877	0.00014369	0.000205447	9.06719e-05	0.00013412	0.000217107	0.000129283	0.00017312		0.00275245
GO:0006892	post-Golgi vesicle-mediated transport	cytoskeleton	0.000234396	0.00022261	0.000190022	0.000134112	0.000242354	0.000310489	0.000231742	0.000268824	0.000175059	0.000117852	7.93471e-05	0.00017887	0.000165046	0.000185797		0.00273652
GO:0046907	intracellular transport	transport	0.00011632	0.000157248	0.000142554	0.000110068	9.17009e-05	0.00022811	0.000140927	0.000295827	0.000118813	6.67863e-05	0.000652709	0.000280481	6.95889e-05	0.000239884		0.00271102
GO:0016477	cell migration	cytoskeleton	0.000179481	0.000181921	0.000155401	0.000242494	0.000272791	0.00013224	0.000232256	0.000221003	0.000214756	0.000216152	0.000140323	0.000145933	0.000159654	0.000213909		0.00270831
GO:0009165	nucleotide biosynthetic process	metabolic process	0.00010522	0.000176496	0.000297592	0.000250097	0.00044182	0.000245046	0.00012972	0.000177315	0.000118691	9.26278e-05	9.17749e-05	0.00012556	5.14413e-05	0.000367094		0.00267049
GO:0009968	negative regulation of signal transduction	signal transduction	0.000491159	8.1818e-05	6.19106e-05	0.000375935	9.73977e-05	5.93036e-05	0.000278786	0.000188876	0.000253031	0.000203662	4.22808e-05	0.000203898	8.0582e-05	0.000228536		0.00264718
GO:0006694	steroid biosynthetic process	metabolic process	0.000154114	0.000170717	0.000420754	0.000245291	0.000232245	0.000244954	0.000144364	0.000191257	0.000118904	0.000137563	0.000158216	0.000157809	8.27401e-05	0.000178783		0.00263771
GO:0007126	meiosis	regulation of cell proliferation	0.000143678	0.000201404	0.000181872	0.000117831	0.000198943	0.000203961	0.000133794	0.00025944	0.0002165	0.000101125	2.16422e-05	0.00012597	0.000187562	0.00053956		0.00263328
GO:0046488	phosphatidylinositol metabolic process	metabolic process	0.000124692	0.000126068	0.000559995	0.000106091	0.000147189	0.000191995	0.000132967	0.000544344	0.000147301	0.000104068	1.9337e-05	0.000116259	0.00011265	0.000184429		0.00261738
GO:0000045	autophagic vacuole formation	cytoskeleton	0.000128623	8.28291e-05	7.64456e-05	7.28145e-05	9.0005e-05	6.56875e-05	0.000276847	0.000558314	0.000200584	0.000287946	6.89181e-05	0.000121718	0.000333999	0.000188838		0.00255357
GO:0006836	neurotransmitter transport	transport	9.11276e-05	0.00021355	0.00025223	0.00014786	0.000215395	0.000189931	0.000110189	0.00065907	0.00010367	0.000103264	8.98774e-05	9.677e-05	5.09451e-05	0.000215809		0.00253969
GO:0050905	neuromuscular process	muscle contraction	0.000118339	0.000116212	0.00012885	0.000374285	0.000259071	0.000206793	0.000143207	0.00053187	0.000197238	0.000115932	5.50671e-05	0.000103911	2.59842e-05	0.000135304		0.00251206
GO:0007626	locomotory behavior	cytoskeleton	0.000155669	0.000147229	0.000126827	0.000148804	0.000173501	0.000236087	0.000163993	0.000462669	0.000142298	0.000199409	0.000134952	0.000112941	8.11396e-05	0.000154186		0.0024397
GO:0042552	myelination	development	4.95851e-05	6.28222e-05	5.17187e-05	4.28257e-05	0.000125197	5.9234e-05	9.05661e-05	0.00146921	0.000122378	3.33862e-05	1.83301e-05	7.35408e-05	5.85205e-05	6.9765e-05		0.00232708
all other	sum of all transcriptome fraction from all other GO categories	other	0.0400382	0.0393462	0.0406697	0.0366147	0.0407371	0.0421802	0.0440779	0.0529187	0.0331923	0.0269263	0.0389401	0.0331332	0.0260393	0.0404207		0.535235
