# Supplementary material for: An Abundance of Ubiquitously Expressed Genes Revealed by Tissue Transcriptome Sequence Data
Source: PLoS Comput Biol. 2009 Dec 11;5(12):e1000598. doi: 10.1371/journal.pcbi.1000598 (PMC2781110; doi:10.1371/journal.pcbi.1000598)
Supplement: Figure S6 — Gene expression for genes with multiple mRNA isoforms (0.19 MB PDF) [file pcbi.1000598.s007.pdf]

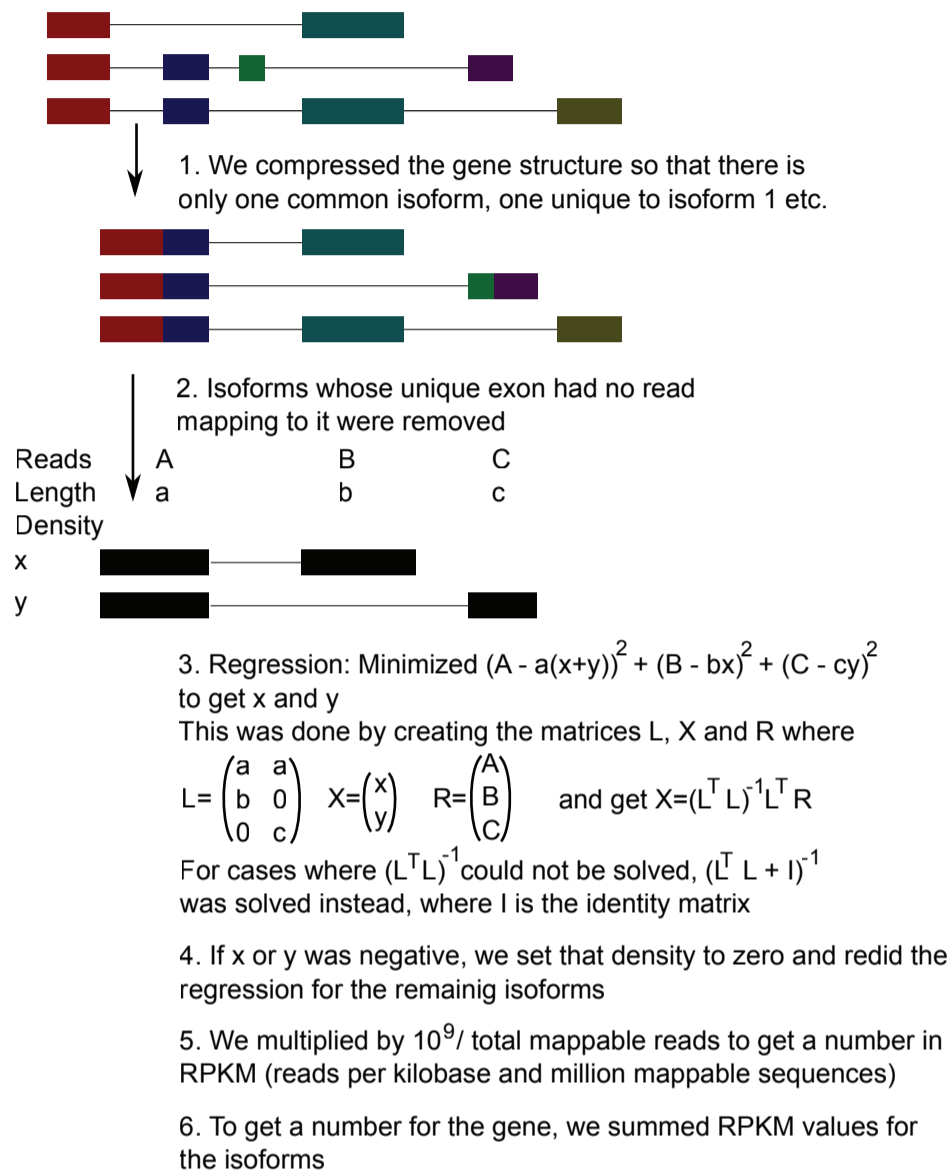

### Supplemental Figure 6. Gene expression for genes with multiple mRNA isoforms

How gene expression from genes with multiple annotated isoforms was calculated. For simplicity, a case where only two isoforms are expressed is shown, but the algorithm was used also for cases with more isoforms.
