# Supplementary material for: An Abundance of Ubiquitously Expressed Genes Revealed by Tissue Transcriptome Sequence Data
Source: PubMed Central journal article supplement (PMC2781110; doi:10.1371/journal.pcbi.1000598), 2009-12-11
Supplement: pcbi.1000598.s001.pdf [file pcbi.1000598.s001.pdf]

Supplemental Table 1. Tissue transcriptome data used

| Sample                     | # reads that map to genome uniquely | Source                | Figures |    |    |    |    |    |    |    |    |   |    |    |    |    |    |    |  |
|----------------------------|-------------------------------------|-----------------------|---------|----|----|----|----|----|----|----|----|---|----|----|----|----|----|----|--|
|                            |                                     |                       | 1A      | 1B | 1C | 2A | 2B | 2C | 2D | 3A | 3B | 4 | 5A | S1 | S2 | S3 | S4 | S5 |  |
| Human brain, low coverage  | 4,399,037                           | Wang et al. 2008      |         | X  | X  |    |    |    |    |    |    |   |    | X  |    |    |    | X  |  |
| UHR                        | 4,356,896                           | Wang et al. 2008      |         | X  | X  |    |    |    |    |    |    |   |    | X  | X  |    |    | X  |  |
| Human adipose tissue       | 18,404,196                          | Wang et al. 2008      | X       | X  | X  | X  |    |    |    | X  |    | X | X  |    |    |    | X  | X  |  |
| Human lymph node           | 16,515,702                          | Wang et al. 2008      | X       | X  | X  | X  |    |    |    | X  |    | X |    |    |    |    | X  | X  |  |
| Human skeletal muscle      | 15,014,322                          | Wang et al. 2008      | X       | X  | X  | X  |    |    |    | X  |    | X |    |    |    |    | X  | X  |  |
| Human heart                | 11,828,357                          | Wang et al. 2008      | X       | X  | X  | X  |    |    |    | X  |    | X | X  |    |    |    | X  | X  |  |
| Human testes               | 19,232,158                          | Wang et al. 2008      | X       | X  | X  | X  |    |    |    | X  | X  | X |    |    |    |    | X  | X  |  |
| Human brain                | 11,282,682                          | Wang et al. 2008      | X       | X  | X  | X  |    |    |    | X  | X  | X |    |    |    |    | X  | X  |  |
| Human colon                | 18,449,121                          | Wang et al. 2008      | X       | X  | X  | X  |    |    |    | X  |    | X |    |    |    |    | X  | X  |  |
| Human liver                | 13,123,679                          | Wang et al. 2008      | X       | X  | X  | X  |    | X  |    | X  |    | X |    |    |    |    | X  | X  |  |
| Human breast               | 11,020,683                          | Wang et al. 2008      | X       | X  | X  | X  |    | X  |    | X  |    | X |    |    |    |    | X  | X  |  |
| HME                        | 13,168,691                          | Wang et al. 2008      |         | X  | X  |    |    | X  |    | X  |    |   |    |    |    |    |    | X  |  |
| BT474                      | 12,247,760                          | Wang et al. 2008      |         | X  | X  |    |    | X  |    | X  |    |   |    |    |    |    |    | X  |  |
| MCF7                       | 10,724,379                          | Wang et al. 2008      |         | X  | X  |    |    | X  |    | X  |    |   |    |    |    |    |    | X  |  |
| MB435                      | 13,123,679                          | Wang et al. 2008      |         | X  | X  |    |    | X  |    | X  |    |   |    |    |    |    |    | X  |  |
| T47D                       | 10,499,080                          | Wang et al. 2008      |         | X  | X  |    |    | X  |    | X  |    |   |    |    |    |    |    | X  |  |
| Human liver                | 33,553,178                          | Marioni et al. 2008   |         | X  | X  |    |    |    | X  |    |    |   |    |    |    |    |    | X  |  |
| Human kidney               | 32,876,644                          | Marioni et al. 2008   | X       | X  | X  | X  |    |    |    |    |    | X |    |    |    |    | X  | X  |  |
| Human cerebellum           | 15,914,965                          | Mudge et al. 2008     | X       | X  | X  | X  |    | X  |    |    |    | X |    |    |    |    | X  | X  |  |
| Human cerebellum           | 17,426,793                          | Mudge et al. 2008     |         | X  | X  |    |    | X  |    |    |    |   |    |    |    |    |    | X  |  |
| Human cerebellum           | 5,845,502                           | Mudge et al. 2008     |         | X  | X  |    |    | X  |    |    |    |   |    |    |    |    |    | X  |  |
| Human cerebellum           | 17,497,308                          | Mudge et al. 2008     |         | X  | X  |    |    | X  |    |    |    |   |    |    |    |    |    | X  |  |
| Human cerebellum           | 16,421,177                          | Mudge et al. 2008     |         | X  | X  |    |    | X  |    |    |    |   |    |    |    |    |    | X  |  |
| Human cerebellum           | 6,568,735                           | Mudge et al. 2008     |         | X  | X  |    |    | X  |    |    |    |   |    |    |    |    |    | X  |  |
| Mouse brain 1              | 14,488,583                          | Mortazavi et al. 2008 |         | X  |    |    |    |    | X  |    |    |   | X  |    |    |    |    | X  |  |
| Mouse liver 1              | 13,133,047                          | Mortazavi et al. 2008 |         | X  |    |    |    |    | X  |    |    |   | X  |    |    |    |    | X  |  |
| Mouse muscle 1             | 16,632,815                          | Mortazavi et al. 2008 |         | X  |    |    |    |    | X  |    |    |   | X  |    |    |    |    | X  |  |
| Mouse brain 2              | 26,519,332                          | Mortazavi et al. 2008 |         |    |    |    |    |    | X  |    |    |   |    |    |    |    |    |    |  |
| Mouse liver 2              | 17,673,013                          | Mortazavi et al. 2008 |         |    |    |    |    |    | X  |    |    |   |    |    |    |    |    |    |  |
| Mouse muscle 2             | 16,632,815                          | Mortazavi et al. 2008 |         |    |    |    |    |    | X  |    |    |   |    |    |    |    |    |    |  |
| Mouse embryonic stem cells | 31,974,136                          | Cloonan et al. 2008   |         |    |    |    |    |    |    |    |    |   | X  |    |    |    |    |    |  |
| Mouse embryoid bodies      | 29,180,840                          | Cloonan et al. 2008   |         |    |    |    |    |    |    |    |    |   | X  |    |    |    |    |    |  |

Abbreviations: UHR, universal human reference; HME, human mammary epithelium
